# Supplementary material for: Temporal expression profiles of lncRNA and mRNA in human embryonic stem cell-derived motor neurons during differentiation
Source: PeerJ. 2020 Nov 13;8:e10075. doi: 10.7717/peerj.10075 (PMC7668206; doi:10.7717/peerj.10075)
Supplement: File S2 [file peerj-08-10075-s002.xlsx]

## Sheet:  D6 vs D0 up 
id	foldChange	log2FoldChange	pval
ENSG00000184486	299.191	8.22492	2.69571e-12
ENSG00000148053	454.292	8.82748	6.47794e-12
ENSG00000111783	315.147	8.29988	1.36138e-11
ENSG00000182968	318.942	8.31715	3.12582e-11
ENSG00000197921	194.092	7.6006	3.76348e-11
ENSG00000075891	267.934	8.06573	1.74708e-10
ENSG00000163873	92.5453	6.53209	1.06588e-09
ENSG00000198732	92.4911	6.53124	2.31551e-09
ENSG00000144218	158.334	7.30683	2.49629e-09
ENSG00000143195	93.9591	6.55396	2.62894e-09
ENSG00000135903	97.7972	6.61172	5.61636e-09
ENSG00000078018	112.482	6.81355	5.7318e-09
ENSG00000143995	93.8204	6.55183	6.7309e-09
ENSG00000136099	79.5846	6.31442	8.40458e-09
ENSG00000145934	69.4974	6.11889	8.64601e-09
ENSG00000120094	98.0287	6.61513	1.13241e-08
ENSG00000111432	87.487	6.451	6.98669e-08
ENSG00000169554	48.8599	5.61058	8.38321e-08
ENSG00000114654	87.1557	6.44552	1.37529e-07
ENSG00000122756	43.2967	5.43619	1.8024e-07
ENSG00000144857	37.2826	5.22043	1.89747e-07
ENSG00000156395	98.6817	6.62471	2.26023e-07
ENSG00000109906	50.7166	5.66439	2.74085e-07
ENSG00000125740	77.5569	6.27718	3.16569e-07
ENSG00000134138	42.7941	5.41934	3.17889e-07
ENSG00000112139	45.5708	5.51004	3.41795e-07
ENSG00000008196	77.2281	6.27105	4.00917e-07
ENSG00000166426	30.4369	4.92775	4.73875e-07
ENSG00000165655	50.5855	5.66065	6.62771e-07
ENSG00000162873	53.5441	5.74266	6.76335e-07
ENSG00000173917	60.7871	5.92569	8.51646e-07
ENSG00000105996	1259.72	10.2989	1.2014e-06
ENSG00000129159	62.1247	5.95709	1.25125e-06
ENSG00000179981	54.0677	5.7567	1.51531e-06
ENSG00000166450	25.7416	4.68603	1.79455e-06
ENSG00000205336	34.9257	5.12622	2.48335e-06
ENSG00000121297	35.0899	5.13299	2.70146e-06
ENSG00000152217	21.0293	4.39433	7.58835e-06
ENSG00000175745	31.8552	4.99346	8.51663e-06
ENSG00000198729	169.055	7.40135	9.05093e-06
ENSG00000120738	21.309	4.41339	1.04033e-05
ENSG00000157851	19.3412	4.27361	1.04534e-05
ENSG00000140807	18.5094	4.21019	1.14535e-05
ENSG00000198719	21.5738	4.43121	1.15428e-05
ENSG00000185551	30.2642	4.91954	1.16806e-05
ENSG00000120093	31.0147	4.95488	1.49896e-05
ENSG00000141449	19.7696	4.30521	1.52869e-05
ENSG00000115266	19.9652	4.31942	1.78236e-05
ENSG00000215397	65.5573	6.03468	1.8392e-05
ENSG00000127863	21.6659	4.43735	2.03051e-05
ENSG00000182463	64.0072	6.00016	2.215e-05
ENSG00000185565	22.7051	4.50494	2.29188e-05
ENSG00000077279	29.9181	4.90295	2.55879e-05
ENSG00000196091	892.636	9.80193	2.58272e-05
ENSG00000276644	46.8527	5.55006	4.14548e-05
ENSG00000149527	75.8604	6.24528	4.18893e-05
ENSG00000144834	24.7981	4.63216	4.19525e-05
ENSG00000171956	23.3827	4.54737	4.29825e-05
ENSG00000111218	21.9327	4.45501	4.33181e-05
ENSG00000161681	20.3926	4.34997	4.3859e-05
ENSG00000155093	22.8693	4.51534	4.40531e-05
ENSG00000134532	20.786	4.37754	4.61067e-05
ENSG00000105894	15.2927	3.93477	4.84339e-05
ENSG00000112539	47.1828	5.56019	5.11174e-05
ENSG00000170390	39.8883	5.31789	5.59045e-05
ENSG00000170549	20.4783	4.35603	6.02052e-05
ENSG00000109132	Inf	Inf	6.30035e-05
ENSG00000196220	14.0656	3.81409	6.543e-05
ENSG00000140836	15.1476	3.92102	7.2286e-05
ENSG00000152977	47.922	5.58262	7.38992e-05
ENSG00000167614	13.6101	3.76661	7.65626e-05
ENSG00000134595	18.0748	4.17591	7.67333e-05
ENSG00000100433	30.2978	4.92114	7.6753e-05
ENSG00000104490	32.5107	5.02284	8.03227e-05
ENSG00000119547	20.0711	4.32705	8.40446e-05
ENSG00000170345	18.092	4.17728	9.19505e-05
ENSG00000125869	31.5994	4.98182	9.37074e-05
ENSG00000138795	18.9718	4.24579	9.44472e-05
ENSG00000174498	12.1028	3.59727	9.93613e-05
ENSG00000147234	23.4401	4.55091	0.000109883
ENSG00000154928	15.2699	3.93262	0.00011668
ENSG00000147509	69.9065	6.12735	0.000122364
ENSG00000177508	14.7941	3.88695	0.000139279
ENSG00000141622	14.2226	3.83011	0.000140251
ENSG00000166963	13.7695	3.7834	0.000143058
ENSG00000174721	11.8727	3.56958	0.000153999
ENSG00000198756	14.7529	3.88293	0.000170489
ENSG00000157168	13.9382	3.80097	0.000206722
ENSG00000182175	10.6642	3.41471	0.000211292
ENSG00000163623	52.0466	5.70173	0.000211906
ENSG00000139767	16.1263	4.01135	0.000225649
ENSG00000150687	12.8128	3.67951	0.00022892
ENSG00000144749	10.2147	3.35257	0.000229896
ENSG00000103056	29.657	4.8903	0.00023432
ENSG00000170689	27.5629	4.78466	0.000253782
ENSG00000110900	12.8825	3.68734	0.000288091
ENSG00000069188	9.88437	3.30515	0.000288315
ENSG00000075461	15.5442	3.95831	0.000288993
ENSG00000181234	15.7165	3.97421	0.000289069
ENSG00000149256	9.97655	3.31854	0.000292672
ENSG00000135333	14.6652	3.87432	0.000297609
ENSG00000187695	48.6437	5.60418	0.000334988
ENSG00000081479	13.6904	3.7751	0.000338592
ENSG00000205922	631.866	9.30348	0.000345324
ENSG00000182742	24.1233	4.59236	0.000345617
ENSG00000171533	18.8435	4.236	0.0003477
ENSG00000148204	9.86538	3.30238	0.000384816
ENSG00000165300	12.4811	3.64167	0.00038938
ENSG00000180592	11.7974	3.56039	0.000455495
ENSG00000168772	17.2194	4.10596	0.000497124
ENSG00000114656	19.9853	4.32086	0.000546248
ENSG00000108947	9.83506	3.29793	0.000567119
ENSG00000149294	10.6101	3.40737	0.000568246
ENSG00000266074	8.95585	3.16283	0.000577921
ENSG00000018625	8.67583	3.117	0.000603631
ENSG00000185008	10.8262	3.43645	0.000609618
ENSG00000107796	20.5425	4.36054	0.000621006
ENSG00000183779	10.5003	3.39235	0.000622581
ENSG00000104722	10.1761	3.34712	0.000628101
ENSG00000185920	8.7713	3.13279	0.000673744
ENSG00000105997	176.271	7.46165	0.000688752
ENSG00000148516	16.4439	4.03948	0.000710582
ENSG00000144847	20.5414	4.36047	0.000730898
ENSG00000125430	10.7939	3.43214	0.000737439
ENSG00000147027	12.9635	3.69639	0.000738938
ENSG00000134775	9.31777	3.21999	0.000751067
ENSG00000169856	13.1618	3.71828	0.000764479
ENSG00000240694	12.3225	3.62322	0.000775983
ENSG00000104967	9.01774	3.17277	0.000832684
ENSG00000171786	26.0293	4.70206	0.000840204
ENSG00000131409	9.31414	3.21942	0.000919131
ENSG00000176842	16.7911	4.06962	0.000931464
ENSG00000186854	10.9613	3.45434	0.00112246
ENSG00000148848	18.5822	4.21585	0.0011236
ENSG00000100767	8.31704	3.05607	0.00119152
ENSG00000130287	9.67715	3.27458	0.0012432
ENSG00000004139	9.28776	3.21533	0.00125473
ENSG00000100626	10.6484	3.41257	0.00131375
ENSG00000184349	8.81967	3.14072	0.00132078
ENSG00000175356	15.833	3.98486	0.00134922
ENSG00000149289	10.2571	3.35855	0.00137243
ENSG00000196776	11.0411	3.46481	0.00151242
ENSG00000198914	99.5798	6.63778	0.00160134
ENSG00000091129	9.58002	3.26003	0.0016553
ENSG00000116035	Inf	Inf	0.00173281
ENSG00000105290	7.80185	2.96382	0.00173441
ENSG00000187122	10.1016	3.33651	0.00176681
ENSG00000101384	7.23292	2.85458	0.00177188
ENSG00000157423	24.2119	4.59764	0.00177684
ENSG00000109991	36.1412	5.17557	0.00183333
ENSG00000196361	17.4324	4.1237	0.00183336
ENSG00000179388	30.5376	4.93251	0.00183726
ENSG00000185386	16.6056	4.05359	0.00187965
ENSG00000164900	108.32	6.75915	0.00193728
ENSG00000159409	37.4439	5.22666	0.00194306
ENSG00000163395	36.5007	5.18985	0.00196775
ENSG00000081138	23.1021	4.52995	0.00207278
ENSG00000170989	24.8935	4.6377	0.00231315
ENSG00000125398	9.49216	3.24674	0.00233444
ENSG00000117461	7.72547	2.94962	0.0024235
ENSG00000212719	43.7793	5.45218	0.00243916
ENSG00000007350	457.351	8.83716	0.00248906
ENSG00000047634	40.0729	5.32455	0.00279899
ENSG00000139219	6.59723	2.72186	0.00284548
ENSG00000048540	19.4603	4.28246	0.00290389
ENSG00000116039	80.8638	6.33742	0.00294919
ENSG00000141431	20.6077	4.36511	0.00301581
ENSG00000205683	43.0218	5.427	0.00323703
ENSG00000198795	7.11748	2.83137	0.00335583
ENSG00000013619	18.1603	4.18272	0.00372259
ENSG00000146197	7.66241	2.9378	0.00376195
ENSG00000217236	419.238	8.71163	0.00394362
ENSG00000189184	6.80495	2.76658	0.00410722
ENSG00000140557	7.91457	2.98451	0.00411597
ENSG00000179314	5.96361	2.57619	0.00412698
ENSG00000090097	6.03717	2.59387	0.00456157
ENSG00000172379	6.51998	2.70487	0.00465879
ENSG00000136944	11.4157	3.51295	0.00476814
ENSG00000184613	6.45779	2.69104	0.00500547
ENSG00000125266	6.37245	2.67185	0.00502617
ENSG00000176771	14.3758	3.84557	0.00505692
ENSG00000087495	21.6967	4.43941	0.0050741
ENSG00000128594	7.05457	2.81856	0.00544316
ENSG00000262655	7.15897	2.83975	0.00554092
ENSG00000102678	102.102	6.67386	0.00561898
ENSG00000110436	13.1228	3.714	0.00587097
ENSG00000204347	10.9642	3.45473	0.00595128
ENSG00000064300	6.52582	2.70616	0.00598709
ENSG00000102362	27.5653	4.78478	0.00615776
ENSG00000102385	10.6619	3.4144	0.00622217
ENSG00000157542	10.0202	3.32485	0.0062364
ENSG00000117707	10.8481	3.43937	0.00641393
ENSG00000147642	76.7982	6.263	0.00642669
ENSG00000198720	5.96925	2.57755	0.00653599
ENSG00000021645	6.80074	2.76569	0.00653913
ENSG00000090776	5.65287	2.49898	0.00673114
ENSG00000167992	6.24775	2.64334	0.00676134
ENSG00000136040	10.7998	3.43293	0.00704168
ENSG00000164099	7.03429	2.8144	0.00705957
ENSG00000144152	8.59878	3.10413	0.00738143
ENSG00000160097	9.71918	3.28083	0.0074736
ENSG00000112232	6.28148	2.6511	0.00772182
ENSG00000244694	18.5274	4.21159	0.00790315
ENSG00000125285	6.23966	2.64147	0.00807315
ENSG00000165194	8.47183	3.08267	0.0084277
ENSG00000082684	5.29482	2.40458	0.00850026
ENSG00000110881	6.45851	2.6912	0.0085972
ENSG00000163661	20.8756	4.38375	0.00887654
ENSG00000120278	9.9139	3.30945	0.00895916
ENSG00000184194	5.65069	2.49843	0.00908277
ENSG00000133216	5.12265	2.35689	0.00920829
ENSG00000111728	11.0469	3.46557	0.00925518
ENSG00000065534	5.11534	2.35483	0.00930712
ENSG00000198727	5.23552	2.38833	0.00935535
ENSG00000165495	6.38798	2.67536	0.00945016
ENSG00000198105	91.2696	6.51206	0.00956056
ENSG00000167552	4.77142	2.25442	0.00987233
ENSG00000134686	5.13167	2.35943	0.00987619
ENSG00000104435	23.9191	4.58009	0.00999696
ENSG00000273079	6.59394	2.72114	0.0100505
ENSG00000168309	42.1961	5.39904	0.0100516
ENSG00000085117	9.41322	3.23469	0.0102514
ENSG00000183908	12.1934	3.60803	0.0103498
ENSG00000085276	26.3278	4.71851	0.0103667
ENSG00000154188	49.6922	5.63495	0.0103956
ENSG00000130822	6.85074	2.77626	0.0104936
ENSG00000180447	7.58156	2.9225	0.0105284
ENSG00000021826	9.26448	3.21171	0.0108043
ENSG00000185742	68.6313	6.10079	0.0108418
ENSG00000022267	5.86779	2.55282	0.0108678
ENSG00000180891	5.63757	2.49507	0.0110174
ENSG00000105991	68.2014	6.09173	0.0111483
ENSG00000153721	5.6145	2.48916	0.0113338
ENSG00000145721	9.87484	3.30376	0.01144
ENSG00000102466	104.308	6.70471	0.0114961
ENSG00000163449	8.08902	3.01597	0.0118048
ENSG00000181085	5.92012	2.56563	0.0118942
ENSG00000187323	19.7727	4.30544	0.0120934
ENSG00000250091	8.07942	3.01425	0.0125704
ENSG00000156299	4.70834	2.23522	0.0127672
ENSG00000100228	9.09315	3.18478	0.0133377
ENSG00000174672	4.98764	2.31836	0.0135712
ENSG00000087903	6.22476	2.63802	0.013845
ENSG00000171016	13.3728	3.74123	0.014373
ENSG00000132688	4.32842	2.11384	0.0145827
ENSG00000162490	4.49749	2.16912	0.014895
ENSG00000188290	5.99323	2.58333	0.0150714
ENSG00000103260	5.09613	2.3494	0.0155888
ENSG00000171234	170.504	7.41366	0.0156944
ENSG00000159388	5.11391	2.35443	0.0157746
ENSG00000078053	5.9866	2.58174	0.0159071
ENSG00000060718	5.16326	2.36828	0.0160539
ENSG00000183914	9.14576	3.1931	0.0163413
ENSG00000085185	4.58848	2.19802	0.0169626
ENSG00000075407	7.01416	2.81027	0.0171913
ENSG00000132970	4.578	2.19472	0.0172535
ENSG00000156011	4.67534	2.22507	0.0172839
ENSG00000139220	13.8618	3.79305	0.0174781
ENSG00000104290	4.76423	2.25224	0.0176674
ENSG00000242732	8.46215	3.08102	0.0177731
ENSG00000133056	4.33859	2.11723	0.0177918
ENSG00000182985	5.12103	2.35643	0.0178649
ENSG00000106829	4.64825	2.21669	0.0182723
ENSG00000143126	4.15372	2.0544	0.0184833
ENSG00000182957	4.85152	2.27844	0.0188811
ENSG00000140937	4.85573	2.27969	0.0189204
ENSG00000196159	4.57283	2.19309	0.018979
ENSG00000091592	6.41788	2.6821	0.01901
ENSG00000198886	4.29968	2.10423	0.0190247
ENSG00000118946	5.15708	2.36656	0.0194186
ENSG00000188779	23.6853	4.56592	0.0199321
ENSG00000088881	6.25559	2.64515	0.0199456
ENSG00000153707	4.80053	2.26319	0.0199618
ENSG00000151640	4.63846	2.21364	0.020117
ENSG00000106571	4.22058	2.07744	0.0202121
ENSG00000170500	16.7829	4.06892	0.0202757
ENSG00000141570	6.91441	2.78961	0.0203518
ENSG00000145284	5.98695	2.58182	0.0214522
ENSG00000132821	9.11325	3.18797	0.0215121
ENSG00000166949	4.29419	2.10239	0.0217507
ENSG00000198646	4.44975	2.15373	0.0218933
ENSG00000154134	4.67329	2.22444	0.0220484
ENSG00000263961	283.838	8.14893	0.0221024
ENSG00000136732	4.57566	2.19398	0.0224918
ENSG00000047648	9.31658	3.2198	0.0229437
ENSG00000131711	3.9057	1.96558	0.0229894
ENSG00000112541	5.90418	2.56174	0.0232326
ENSG00000108557	4.15021	2.05318	0.0233383
ENSG00000137764	4.58981	2.19844	0.0235289
ENSG00000188042	4.47271	2.16115	0.0243673
ENSG00000205593	6.29413	2.65401	0.0247358
ENSG00000101265	4.82562	2.27071	0.024874
ENSG00000176887	3.85792	1.94782	0.0248934
ENSG00000146426	4.57795	2.1947	0.0251623
ENSG00000180530	6.92462	2.79173	0.025814
ENSG00000159433	3.98623	1.99502	0.0259404
ENSG00000116729	4.5537	2.18704	0.0264019
ENSG00000140538	7.26904	2.86177	0.0269603
ENSG00000178662	5.17453	2.37143	0.0270769
ENSG00000076356	3.87077	1.95262	0.027239
ENSG00000180340	3.99911	1.99968	0.0272957
ENSG00000126259	5.11262	2.35406	0.0274345
ENSG00000103187	3.87184	1.95302	0.0274759
ENSG00000112320	5.51629	2.4637	0.0279964
ENSG00000198929	4.44979	2.15374	0.02814
ENSG00000158292	4.17021	2.06012	0.0284078
ENSG00000205143	16.6903	4.06094	0.0288701
ENSG00000122877	11.1215	3.47527	0.029358
ENSG00000170921	4.07881	2.02815	0.0298837
ENSG00000175866	4.11929	2.0424	0.0300755
ENSG00000151835	4.07902	2.02822	0.030111
ENSG00000187240	5.30258	2.40669	0.0305388
ENSG00000109339	5.52245	2.46531	0.0309563
ENSG00000239887	4.39419	2.1356	0.0310163
ENSG00000171843	8.3385	3.05979	0.0311839
ENSG00000196358	9.784	3.29042	0.0312919
ENSG00000104313	12.3062	3.62131	0.0317861
ENSG00000174501	5.81658	2.54017	0.0322149
ENSG00000116117	5.09791	2.34991	0.0323238
ENSG00000005379	3.93493	1.97634	0.0326392
ENSG00000015592	37.292	5.22079	0.0328774
ENSG00000140450	8.24405	3.04335	0.03466
ENSG00000198786	3.57185	1.83667	0.0349044
ENSG00000173376	12.7699	3.67467	0.0353236
ENSG00000225968	4.42675	2.14625	0.0354713
ENSG00000041515	24.9685	4.64204	0.0355254
ENSG00000119242	4.52459	2.17779	0.0361483
ENSG00000196208	3.5529	1.829	0.0363419
ENSG00000178235	23.9206	4.58018	0.0366019
ENSG00000006283	4.23842	2.08353	0.0370292
ENSG00000102935	3.48784	1.80233	0.037971
ENSG00000186469	4.96518	2.31185	0.0382887
ENSG00000003137	20.2598	4.34055	0.0391498
ENSG00000196517	3.85605	1.94712	0.0395098
ENSG00000183496	4.06762	2.02418	0.0395176
ENSG00000183722	10.3125	3.36632	0.0395802
ENSG00000196376	4.92305	2.29955	0.040811
ENSG00000106003	3.61734	1.85493	0.0412478
ENSG00000175265	3.61828	1.8553	0.0420027
ENSG00000063127	4.70535	2.2343	0.0421885
ENSG00000152784	39.8956	5.31816	0.0428591
ENSG00000166780	4.17548	2.06194	0.0428728
ENSG00000100154	3.4506	1.78685	0.0434452
ENSG00000151376	8.60637	3.10541	0.0438463
ENSG00000078549	3.95374	1.98322	0.0438916
ENSG00000169862	3.73878	1.90257	0.0442839
ENSG00000269713	3.85783	1.94779	0.0448811
ENSG00000271254	4.2006	2.07059	0.0451784
ENSG00000158258	4.94231	2.30518	0.0458101
ENSG00000101198	4.59927	2.20141	0.0464202
ENSG00000053438	3.49051	1.80344	0.0465029
ENSG00000163273	9.95044	3.31476	0.0469245
ENSG00000169184	3.49268	1.80433	0.0469898
ENSG00000154721	7.72918	2.95031	0.0470218
ENSG00000146592	9.73762	3.28357	0.0471127
ENSG00000104093	4.73813	2.24432	0.0475205
ENSG00000117114	3.92796	1.97378	0.0478018
ENSG00000091656	4.09454	2.0337	0.0480728
ENSG00000143344	5.64989	2.49822	0.0493864
ENSG00000160145	3.61642	1.85456	0.0495566

## Sheet: D6 vs D0 down
id	foldChange	log2FoldChange	pval
ENSG00000146904	0.00418748	-7.8997	2.1132e-11
ENSG00000148357	0.00402877	-7.95544	2.15955e-11
ENSG00000130182	0.0047473	-7.71868	2.34561e-11
ENSG00000204531	0.00630625	-7.309	2.42011e-11
ENSG00000147596	0.00241569	-8.69335	4.70986e-11
ENSG00000241186	0.00417032	-7.90563	6.4811e-11
ENSG00000039068	0.0054004	-7.53272	1.23912e-10
ENSG00000240563	0.00937982	-6.73622	1.45356e-09
ENSG00000133477	0.00524778	-7.57408	1.79436e-09
ENSG00000106538	0.0048461	-7.68896	2.23725e-09
ENSG00000111319	0.00764206	-7.03182	3.05965e-09
ENSG00000128052	0.00651491	-7.26204	5.88177e-09
ENSG00000138650	0.0102519	-6.60796	7.63676e-09
ENSG00000156966	0.011076	-6.49642	8.17829e-09
ENSG00000101276	0.00190315	-9.03739	1.08593e-08
ENSG00000179059	0.0100906	-6.63084	1.26185e-08
ENSG00000136574	0.00598018	-7.38559	1.28623e-08
ENSG00000163508	0.00488999	-7.67595	1.57841e-08
ENSG00000163694	0.00880469	-6.82751	1.6878e-08
ENSG00000167600	0.0144126	-6.11652	1.71634e-08
ENSG00000129354	0.00792073	-6.98015	2.9362e-08
ENSG00000131203	0	-Inf	3.0395e-08
ENSG00000184697	0.0176227	-5.82642	3.50606e-08
ENSG00000160973	0.013631	-6.19696	4.50069e-08
ENSG00000182866	0.00453829	-7.78364	4.79493e-08
ENSG00000104413	0.00704657	-7.14886	6.89816e-08
ENSG00000170373	0.0170618	-5.87309	7.22633e-08
ENSG00000052344	0.0151178	-6.04761	7.97825e-08
ENSG00000050555	0.0115323	-6.43818	8.73012e-08
ENSG00000124839	0.0149063	-6.06794	9.54494e-08
ENSG00000205517	0.00751886	-7.05527	1.02667e-07
ENSG00000102755	0.00304852	-8.35768	1.0419e-07
ENSG00000120949	0.00517702	-7.59366	1.09852e-07
ENSG00000103067	0.011308	-6.46651	1.20507e-07
ENSG00000156453	0.0216773	-5.52767	1.30756e-07
ENSG00000198286	0.0082428	-6.92265	1.39414e-07
ENSG00000110148	0.0167373	-5.90079	1.94708e-07
ENSG00000163251	0.0263023	-5.24867	2.15706e-07
ENSG00000164736	0.0111704	-6.48417	2.78754e-07
ENSG00000069482	0.0132424	-6.23869	3.04322e-07
ENSG00000159166	0.00375817	-8.05575	3.12309e-07
ENSG00000141448	0.0131776	-6.24577	3.29888e-07
ENSG00000133980	0.024779	-5.33474	3.46252e-07
ENSG00000170542	0.0177578	-5.8154	3.48108e-07
ENSG00000185885	0.0196829	-5.66691	3.95802e-07
ENSG00000161249	0.0235555	-5.40779	4.50312e-07
ENSG00000101076	0.00943034	-6.72847	4.5522e-07
ENSG00000141738	0.00845098	-6.88667	5.26694e-07
ENSG00000107562	0.00651539	-7.26193	6.27628e-07
ENSG00000158246	0.0225013	-5.47385	6.31785e-07
ENSG00000163814	0.0013655	-9.51635	6.48576e-07
ENSG00000105707	0.00969983	-6.68783	6.8536e-07
ENSG00000154783	0.0158742	-5.97717	6.96952e-07
ENSG00000141934	0.0150721	-6.05197	7.31058e-07
ENSG00000119888	0.0235536	-5.40791	8.39192e-07
ENSG00000141682	0.012805	-6.28715	9.61832e-07
ENSG00000118898	0.0241874	-5.3696	1.115e-06
ENSG00000188112	0.0231947	-5.43006	1.1879e-06
ENSG00000169894	0.00204408	-8.93433	1.23677e-06
ENSG00000273706	0.0138799	-6.17086	1.30149e-06
ENSG00000077009	0.00983653	-6.66763	1.32352e-06
ENSG00000140832	0.00586814	-7.41288	1.39328e-06
ENSG00000130203	0.0380264	-4.71686	1.50622e-06
ENSG00000151650	0.00522648	-7.57994	1.5404e-06
ENSG00000127824	0.0086144	-6.85903	1.59799e-06
ENSG00000142273	0.00629576	-7.3114	1.60399e-06
ENSG00000135525	0.0218533	-5.516	1.70808e-06
ENSG00000050327	0.01523	-6.03694	1.85179e-06
ENSG00000136383	0.0353888	-4.82056	1.95972e-06
ENSG00000083307	0.0141857	-6.13941	2.03293e-06
ENSG00000110799	0.00886084	-6.81834	2.04137e-06
ENSG00000171126	0.00925164	-6.75607	2.30139e-06
ENSG00000119866	0.00788274	-6.98709	2.40516e-06
ENSG00000165588	0.0164871	-5.92252	2.44972e-06
ENSG00000131969	0.00905901	-6.78643	2.47057e-06
ENSG00000092758	0.0324269	-4.94667	2.54519e-06
ENSG00000124493	0.0253339	-5.30279	2.65609e-06
ENSG00000181885	0.0141262	-6.14548	2.91263e-06
ENSG00000111704	0.010549	-6.56676	2.91892e-06
ENSG00000111057	0.0427438	-4.54814	2.94581e-06
ENSG00000176485	0.0198794	-5.65258	2.96379e-06
ENSG00000128610	0.00483355	-7.6927	3.22084e-06
ENSG00000010278	0.021492	-5.54005	3.38886e-06
ENSG00000106078	0.0169202	-5.88511	3.45178e-06
ENSG00000043143	0.0263937	-5.24366	3.5744e-06
ENSG00000130768	0.0171521	-5.86547	3.58643e-06
ENSG00000130303	0.0338334	-4.88541	3.67658e-06
ENSG00000166145	0.0351281	-4.83123	3.8014e-06
ENSG00000135919	0.0379936	-4.7181	3.89715e-06
ENSG00000136110	0.00761468	-7.037	5.46042e-06
ENSG00000180730	0.014442	-6.11358	6.11239e-06
ENSG00000243709	0.0253663	-5.30094	6.49584e-06
ENSG00000078295	0.0309668	-5.01313	6.89027e-06
ENSG00000176387	0.0149467	-6.06403	7.14673e-06
ENSG00000078725	0.00932025	-6.74542	7.30548e-06
ENSG00000198626	0.0158615	-5.97833	7.39163e-06
ENSG00000137486	0.0391986	-4.67305	8.30013e-06
ENSG00000184344	0.000982333	-9.9915	8.30095e-06
ENSG00000187678	0.040874	-4.61267	8.63208e-06
ENSG00000156574	0.0199676	-5.6462	1.0228e-05
ENSG00000108950	0.0158043	-5.98354	1.11239e-05
ENSG00000170421	0.0548658	-4.18795	1.11253e-05
ENSG00000147869	0.047275	-4.40278	1.16586e-05
ENSG00000103490	0.00399905	-7.96613	1.34612e-05
ENSG00000197406	0.0305862	-5.03098	1.41809e-05
ENSG00000105289	0.0175469	-5.83264	1.47311e-05
ENSG00000095596	0.0498753	-4.32553	1.48092e-05
ENSG00000204936	0	-Inf	1.51601e-05
ENSG00000116774	0.0412969	-4.59782	1.53835e-05
ENSG00000062038	0.0484991	-4.3659	1.66068e-05
ENSG00000165905	0.0322981	-4.95241	1.67721e-05
ENSG00000096433	0.0492912	-4.34253	1.74264e-05
ENSG00000164379	0.0141468	-6.14338	1.8552e-05
ENSG00000198682	0.0153515	-6.02548	1.90767e-05
ENSG00000179023	0.0104839	-6.57568	1.91616e-05
ENSG00000118137	0.0358132	-4.80336	1.94067e-05
ENSG00000163191	0.0305161	-5.03429	2.16096e-05
ENSG00000128849	0.0539418	-4.21245	2.27618e-05
ENSG00000174640	0.0242083	-5.36836	2.29443e-05
ENSG00000175832	0.0467788	-4.418	2.68527e-05
ENSG00000158874	0.016106	-5.95626	2.7636e-05
ENSG00000149418	0.0219827	-5.50749	2.96577e-05
ENSG00000042493	0.0351095	-4.83199	2.99499e-05
ENSG00000148926	0.0380925	-4.71435	3.12199e-05
ENSG00000130477	0.0511287	-4.28972	3.42927e-05
ENSG00000125968	0.0541536	-4.2068	3.44796e-05
ENSG00000137331	0.035338	-4.82263	3.5121e-05
ENSG00000163501	0.0150498	-6.05411	3.54233e-05
ENSG00000159618	0.0100296	-6.63959	3.5611e-05
ENSG00000099337	0.0147655	-6.08162	3.63959e-05
ENSG00000118640	0.019611	-5.67219	4.18295e-05
ENSG00000112379	0.0483524	-4.37027	4.56033e-05
ENSG00000171345	0.0637336	-3.9718	4.59428e-05
ENSG00000076716	0.0643221	-3.95854	5.21344e-05
ENSG00000125144	0.00123518	-9.66107	5.55676e-05
ENSG00000162069	0.00679399	-7.20153	5.56069e-05
ENSG00000110090	0.0327704	-4.93146	5.58221e-05
ENSG00000125798	0.0186309	-5.74616	5.58596e-05
ENSG00000101210	0.0253967	-5.29921	6.0659e-05
ENSG00000143768	0.0649154	-3.94529	6.67213e-05
ENSG00000166250	0.0332107	-4.91221	6.94514e-05
ENSG00000125462	0.00417032	-7.90563	7.77955e-05
ENSG00000158825	0.00710062	-7.13784	7.80749e-05
ENSG00000164591	0.00899151	-6.79722	8.10829e-05
ENSG00000102096	0.0594699	-4.0717	8.74715e-05
ENSG00000157227	0.0691903	-3.85329	8.97231e-05
ENSG00000179046	0.00425886	-7.87532	9.1312e-05
ENSG00000167779	0.0281245	-5.15203	9.80205e-05
ENSG00000106789	0.0547514	-4.19096	9.84709e-05
ENSG00000173281	0.0538308	-4.21542	9.93574e-05
ENSG00000101194	0.0338937	-4.88284	0.000101152
ENSG00000106631	0.022359	-5.483	0.000108166
ENSG00000169692	0.02108	-5.56798	0.000108179
ENSG00000184012	0.008729	-6.83997	0.000108268
ENSG00000111331	0	-Inf	0.000111985
ENSG00000132359	0.0673996	-3.89112	0.000119434
ENSG00000175707	0.00751987	-7.05508	0.000120025
ENSG00000088305	0.0858921	-3.54133	0.000120657
ENSG00000135063	0.00886009	-6.81846	0.000120863
ENSG00000090530	0.0564303	-4.14739	0.000122618
ENSG00000179344	0.0240043	-5.38056	0.000123065
ENSG00000167642	0.075453	-3.72828	0.000123426
ENSG00000008516	0.0293792	-5.08906	0.000132398
ENSG00000058085	0.00897907	-6.79922	0.000133279
ENSG00000139629	0.0126159	-6.30862	0.00014356
ENSG00000153093	0.014717	-6.08637	0.000148039
ENSG00000128567	0.0904048	-3.46746	0.000152338
ENSG00000050344	0.0372583	-4.7463	0.000155815
ENSG00000185101	0.0267183	-5.22603	0.000159482
ENSG00000124225	0.036613	-4.7715	0.000163859
ENSG00000184261	0.041077	-4.60553	0.000163877
ENSG00000164976	0.0417053	-4.58362	0.000168208
ENSG00000127831	0.0307367	-5.02389	0.000179785
ENSG00000008323	0.0344968	-4.85739	0.00018046
ENSG00000112297	0.0193519	-5.69138	0.000188887
ENSG00000151952	0.0465848	-4.424	0.000192569
ENSG00000134954	0.0315634	-4.9856	0.000192695
ENSG00000163520	0.0827744	-3.59467	0.000194576
ENSG00000166105	0.0340963	-4.87424	0.000198307
ENSG00000154914	0.0114373	-6.45011	0.000198414
ENSG00000049089	0.0810559	-3.62494	0.00019853
ENSG00000089250	0.0195076	-5.67982	0.000199655
ENSG00000006327	0.050372	-4.31123	0.000200097
ENSG00000188643	0.0496832	-4.3311	0.000208913
ENSG00000142405	0.00568573	-7.45844	0.000210253
ENSG00000185155	0.0192349	-5.70013	0.000210916
ENSG00000121310	0.0435767	-4.5203	0.00021311
ENSG00000107485	0.0150405	-6.05501	0.000219276
ENSG00000145911	0.0794739	-3.65338	0.000224707
ENSG00000131771	0.00967177	-6.692	0.000226988
ENSG00000197993	0.0259387	-5.26875	0.000228384
ENSG00000164265	0.00756545	-7.04636	0.000256535
ENSG00000135842	0.0280784	-5.15439	0.000258812
ENSG00000120937	0.0418716	-4.57788	0.000261644
ENSG00000168672	0.0735673	-3.76479	0.000269612
ENSG00000124570	0.0383242	-4.7056	0.000273258
ENSG00000130707	0.0525361	-4.25055	0.000275384
ENSG00000164142	0.0358533	-4.80175	0.000275641
ENSG00000059804	0.0972837	-3.36166	0.000287559
ENSG00000164488	0.034686	-4.8495	0.000292839
ENSG00000170961	0.0374342	-4.7395	0.00029559
ENSG00000137880	0.0220129	-5.50551	0.000299285
ENSG00000145113	0.0101617	-6.62071	0.000319678
ENSG00000112343	0.00948179	-6.72063	0.000336355
ENSG00000116661	0.0481741	-4.3756	0.000337025
ENSG00000255192	0.0109996	-6.50641	0.000343645
ENSG00000177469	0.0663709	-3.91331	0.000357682
ENSG00000159753	0.0677736	-3.88313	0.000363595
ENSG00000152208	0.0256159	-5.28681	0.000367918
ENSG00000139874	0.00160989	-9.27882	0.000381714
ENSG00000117595	0.00521019	-7.58445	0.000387812
ENSG00000184363	0.0242596	-5.3653	0.000395388
ENSG00000167105	0.0230566	-5.43868	0.000406526
ENSG00000103257	0.105808	-3.24048	0.000409497
ENSG00000073350	0.0847167	-3.56121	0.000428875
ENSG00000198624	0.00991941	-6.65553	0.000455622
ENSG00000142173	0.104658	-3.25624	0.000458161
ENSG00000168938	0.00824998	-6.92139	0.000462919
ENSG00000135480	0.0122687	-6.34888	0.000471151
ENSG00000170608	0.0363235	-4.78295	0.00047915
ENSG00000132297	0.0054141	-7.52906	0.000501222
ENSG00000162542	0.00842825	-6.89055	0.000533067
ENSG00000125845	0.0739165	-3.75796	0.000535215
ENSG00000146700	0.0599703	-4.05961	0.000544716
ENSG00000156959	0.0566586	-4.14156	0.00054664
ENSG00000166482	0.0386167	-4.69463	0.000552236
ENSG00000182107	0.00756002	-7.04739	0.000562617
ENSG00000125850	0.00170862	-9.19295	0.000565095
ENSG00000170190	0.0630117	-3.98824	0.000574067
ENSG00000253304	0.0248295	-5.3318	0.000579458
ENSG00000167772	0.026736	-5.22507	0.000594007
ENSG00000189430	0.0112946	-6.46822	0.000644236
ENSG00000111344	0.00774488	-7.01254	0.000657965
ENSG00000130762	0.0784281	-3.67249	0.000661105
ENSG00000132698	0.053643	-4.22047	0.000663108
ENSG00000100341	0.0017565	-9.15308	0.000674605
ENSG00000132031	0.0264933	-5.23823	0.000693891
ENSG00000172830	0.0636801	-3.97301	0.000710642
ENSG00000154096	0.113841	-3.13491	0.000721889
ENSG00000065717	0.0245623	-5.34741	0.00078598
ENSG00000125966	0.0676967	-3.88477	0.000861981
ENSG00000109854	0.0439414	-4.50828	0.000865229
ENSG00000117834	0.02497	-5.32366	0.00086996
ENSG00000006047	0.0648209	-3.9474	0.000870355
ENSG00000065361	0.099323	-3.33173	0.000875477
ENSG00000165863	0.0199642	-5.64644	0.000906963
ENSG00000130545	0.0186826	-5.74216	0.000909452
ENSG00000089820	0.0782042	-3.67661	0.000918239
ENSG00000119411	0.00473095	-7.72365	0.000932193
ENSG00000122359	0.0905864	-3.46456	0.000950801
ENSG00000167306	0.0597196	-4.06565	0.000955966
ENSG00000204264	0.0182173	-5.77855	0.000974473
ENSG00000197444	0.0771076	-3.69698	0.000990892
ENSG00000204711	0.00603286	-7.37294	0.000999923
ENSG00000124143	0.0112272	-6.47686	0.00100599
ENSG00000213626	0.0898548	-3.47626	0.00104297
ENSG00000185187	0.0662931	-3.915	0.00107021
ENSG00000156049	0.00839299	-6.8966	0.00108904
ENSG00000154760	0.00189955	-9.04013	0.00109535
ENSG00000130813	0.0286561	-5.12502	0.00112054
ENSG00000140835	0.00348856	-8.16315	0.00113479
ENSG00000253368	0.0239239	-5.38541	0.001166
ENSG00000011201	0.0931848	-3.42376	0.0011718
ENSG00000145794	0.0546265	-4.19426	0.0011849
ENSG00000265763	0	-Inf	0.00119299
ENSG00000179178	0.0105854	-6.56179	0.00119414
ENSG00000111679	0.0612799	-4.02844	0.00125646
ENSG00000056972	0.0336103	-4.89495	0.00127199
ENSG00000137193	0.101622	-3.29872	0.00128608
ENSG00000133401	0.0792055	-3.65826	0.00129629
ENSG00000142910	0.016866	-5.88974	0.00130111
ENSG00000130307	0.0212107	-5.55907	0.00130817
ENSG00000180347	0	-Inf	0.00134124
ENSG00000104518	0.0728247	-3.77943	0.0013606
ENSG00000164292	0.0985435	-3.3431	0.0013631
ENSG00000101443	0.0565825	-4.1435	0.00137942
ENSG00000159251	0.0845257	-3.56447	0.00140415
ENSG00000163492	0.0137735	-6.18196	0.00143371
ENSG00000092421	0.135116	-2.88772	0.0014704
ENSG00000105048	0.101814	-3.29599	0.00152217
ENSG00000162496	0.0429937	-4.53973	0.00153215
ENSG00000113763	0.0351779	-4.82919	0.001535
ENSG00000148677	0.0412368	-4.59992	0.00156267
ENSG00000185436	0.0340537	-4.87605	0.00161172
ENSG00000130830	0.0131278	-6.25123	0.00162029
ENSG00000134207	0.095452	-3.38908	0.0016326
ENSG00000197461	0.0804515	-3.63574	0.00163351
ENSG00000165215	0.0283685	-5.13957	0.00164436
ENSG00000158710	0.106501	-3.23106	0.00168856
ENSG00000143494	0.121686	-3.03876	0.00176927
ENSG00000134755	0.070504	-3.82615	0.00183003
ENSG00000235750	0.00804946	-6.95689	0.00195395
ENSG00000130208	0.0800452	-3.64304	0.00195666
ENSG00000048545	0.0368736	-4.76127	0.00200595
ENSG00000089847	0.0651851	-3.93931	0.00202014
ENSG00000150907	0.0956243	-3.38648	0.00205013
ENSG00000173193	0.0744961	-3.74669	0.00207049
ENSG00000213214	0.0126957	-6.29951	0.00208091
ENSG00000143632	0.0693142	-3.85071	0.00209495
ENSG00000162949	0.00544102	-7.52191	0.0021319
ENSG00000169418	0.0388243	-4.68689	0.00216447
ENSG00000130675	0.008221	-6.92647	0.00220217
ENSG00000141524	0.121257	-3.04386	0.00229688
ENSG00000187140	0.0295568	-5.08036	0.00233113
ENSG00000166073	0.0874109	-3.51604	0.00233184
ENSG00000124302	0.0533285	-4.22895	0.00234209
ENSG00000095739	0.0399189	-4.64678	0.00252264
ENSG00000226792	0.0131392	-6.24997	0.00252273
ENSG00000198113	0.0857329	-3.54401	0.00252468
ENSG00000197747	0.0527172	-4.24558	0.00253208
ENSG00000166206	0.121778	-3.03768	0.00259789
ENSG00000160223	0.0397464	-4.65303	0.00263512
ENSG00000135926	0.0671507	-3.89645	0.00271673
ENSG00000170955	0.0415133	-4.59028	0.00274256
ENSG00000152939	0.0438846	-4.51014	0.00275311
ENSG00000103335	0.13032	-2.93987	0.00279509
ENSG00000135750	0.0201854	-5.63054	0.00281387
ENSG00000177685	0.0789805	-3.66236	0.00286136
ENSG00000178038	0.0447181	-4.483	0.00288288
ENSG00000135916	0.155991	-2.68047	0.00307689
ENSG00000133106	0.0291183	-5.10193	0.00310029
ENSG00000143850	0.087965	-3.50693	0.00315815
ENSG00000125730	0.0223709	-5.48223	0.00317457
ENSG00000024422	0.0702019	-3.83235	0.0031772
ENSG00000165795	0.061187	-4.03063	0.00318788
ENSG00000143382	0.0386463	-4.69353	0.00324415
ENSG00000188522	0.135176	-2.88709	0.00324869
ENSG00000164619	0.0346874	-4.84944	0.00329502
ENSG00000198915	0.0749399	-3.73812	0.00332497
ENSG00000178343	0.00591137	-7.40229	0.00335537
ENSG00000184408	0.0544854	-4.19799	0.00336759
ENSG00000008083	0.160816	-2.63652	0.00337291
ENSG00000082781	0.158831	-2.65444	0.00339642
ENSG00000187210	0.0501481	-4.31766	0.0034011
ENSG00000189431	0.0467066	-4.42023	0.00344365
ENSG00000076662	0.0672575	-3.89416	0.0034484
ENSG00000181284	0.0338423	-4.88503	0.00350889
ENSG00000130055	0.0731213	-3.77356	0.00358249
ENSG00000146674	0.0703332	-3.82965	0.00360256
ENSG00000115414	0.169265	-2.56265	0.00362152
ENSG00000124507	0.0701613	-3.83318	0.00362894
ENSG00000126803	0.064341	-3.95812	0.00363426
ENSG00000087085	0.0417145	-4.58331	0.00364879
ENSG00000135269	0.051394	-4.28226	0.00370027
ENSG00000072818	0.0527473	-4.24476	0.00373199
ENSG00000124145	0.135463	-2.88403	0.00373837
ENSG00000158815	0.147664	-2.75961	0.00374259
ENSG00000084636	0.0889517	-3.49083	0.00374751
ENSG00000152804	0.00438933	-7.83178	0.00409616
ENSG00000135111	0.039885	-4.64801	0.00412892
ENSG00000128283	0.0884028	-3.49976	0.00414739
ENSG00000177096	0.0405042	-4.62578	0.00414851
ENSG00000164741	0.078062	-3.67924	0.00416395
ENSG00000147601	0.161072	-2.63422	0.00419451
ENSG00000100292	0.0749242	-3.73842	0.00420406
ENSG00000135636	0.117126	-3.09386	0.00422234
ENSG00000261150	0.147675	-2.75951	0.00422704
ENSG00000009950	0.0515809	-4.27702	0.00430509
ENSG00000166888	0.146129	-2.77469	0.00433194
ENSG00000174292	0.0573121	-4.12502	0.00437341
ENSG00000169851	0.11712	-3.09394	0.00438393
ENSG00000213694	0.109211	-3.19481	0.00441648
ENSG00000173156	0.0320582	-4.96316	0.00454221
ENSG00000171794	0.0146775	-6.09025	0.00455118
ENSG00000140545	0.172964	-2.53146	0.0045887
ENSG00000140564	0.154494	-2.69438	0.00460804
ENSG00000166387	0.119259	-3.06783	0.00470918
ENSG00000181274	0.116211	-3.10518	0.00471392
ENSG00000103044	0.128804	-2.95675	0.00471574
ENSG00000181392	0.0531371	-4.23414	0.00478883
ENSG00000142632	0.142378	-2.8122	0.00479995
ENSG00000176720	0.130782	-2.93476	0.00481348
ENSG00000174951	0.045759	-4.4498	0.00485204
ENSG00000140511	0.10219	-3.29067	0.00487975
ENSG00000157399	0.0625488	-3.99887	0.00489504
ENSG00000132749	0.0993814	-3.33088	0.00493175
ENSG00000105357	0.148962	-2.74699	0.0050033
ENSG00000173227	0.068136	-3.87544	0.00511075
ENSG00000089116	0.0670067	-3.89955	0.0054916
ENSG00000137267	0.174402	-2.51951	0.00550628
ENSG00000158764	0.00651274	-7.26252	0.00551103
ENSG00000164056	0.0845068	-3.56479	0.00556444
ENSG00000177706	0.150778	-2.7295	0.00563907
ENSG00000181019	0.0696795	-3.84312	0.00585157
ENSG00000103710	0.076109	-3.71579	0.00591151
ENSG00000133937	0.0591912	-4.07847	0.00594047
ENSG00000158220	0.0397213	-4.65394	0.00602808
ENSG00000162433	0.130562	-2.9372	0.00608645
ENSG00000166831	0.162081	-2.62522	0.00609281
ENSG00000070886	0.0213721	-5.54813	0.00611562
ENSG00000121570	0.177631	-2.49305	0.00619709
ENSG00000166535	0.00667159	-7.22775	0.00620056
ENSG00000061337	0.126815	-2.97921	0.00620924
ENSG00000275410	0.0386192	-4.69454	0.00624563
ENSG00000130270	0.0464615	-4.42782	0.00629139
ENSG00000084674	0.021503	-5.53932	0.00630123
ENSG00000111752	0.187425	-2.41562	0.00643018
ENSG00000113356	0.084131	-3.57122	0.00651861
ENSG00000135127	0.0882288	-3.50261	0.00657501
ENSG00000115828	0.00267457	-8.54648	0.00684223
ENSG00000107099	0.0428898	-4.54322	0.00689876
ENSG00000079337	0.0977875	-3.35421	0.00701206
ENSG00000106211	0.167181	-2.58051	0.00720924
ENSG00000134463	0.083421	-3.58345	0.00724709
ENSG00000186838	0.0353245	-4.82319	0.00733731
ENSG00000102996	0.182575	-2.45344	0.00735039
ENSG00000162458	0.159513	-2.64825	0.00739433
ENSG00000138083	0.0134497	-6.21628	0.00743233
ENSG00000243811	0.0687069	-3.8634	0.00751346
ENSG00000147394	0.0981847	-3.34836	0.00753001
ENSG00000173218	0.126729	-2.98018	0.00754145
ENSG00000132622	0.0684562	-3.86868	0.00759753
ENSG00000005884	0.141635	-2.81975	0.00769381
ENSG00000178568	0.0638558	-3.96904	0.00769765
ENSG00000115107	0.127705	-2.96911	0.00772513
ENSG00000136603	0.0918699	-3.44426	0.00775556
ENSG00000197355	0.0864188	-3.53251	0.00776382
ENSG00000095383	0.0947148	-3.40027	0.00779001
ENSG00000189334	0.0567714	-4.13869	0.00788469
ENSG00000085831	0.0268651	-5.21813	0.00798495
ENSG00000121898	0.00704657	-7.14886	0.00803785
ENSG00000149591	0.187173	-2.41756	0.00804519
ENSG00000104998	0.0863179	-3.5342	0.00810045
ENSG00000100065	0.136284	-2.87532	0.00817957
ENSG00000171587	0.0815079	-3.61692	0.00820024
ENSG00000182718	0.143357	-2.80231	0.00832244
ENSG00000169871	0.174102	-2.52199	0.00848505
ENSG00000159167	0.160557	-2.63884	0.00849599
ENSG00000140044	0.0841457	-3.57097	0.00851994
ENSG00000184254	0.0217671	-5.52171	0.00856094
ENSG00000023892	0.0539118	-4.21326	0.00861706
ENSG00000184307	0.0470139	-4.41077	0.00861849
ENSG00000041982	0.189632	-2.39873	0.00871476
ENSG00000143248	0.0497694	-4.3286	0.00872851
ENSG00000165731	0.0980598	-3.35019	0.00883704
ENSG00000050767	0.124782	-3.00252	0.00893743
ENSG00000129521	0.10194	-3.2942	0.00896883
ENSG00000101445	0.128699	-2.95793	0.00897708
ENSG00000171724	0.170559	-2.55166	0.009005
ENSG00000174059	0.0051967	-7.58819	0.00924461
ENSG00000105088	0.171555	-2.54326	0.00940246
ENSG00000171219	0.133253	-2.90776	0.00947062
ENSG00000092068	0.188752	-2.40543	0.0094792
ENSG00000144730	0.180137	-2.47283	0.00957048
ENSG00000157992	0.0864262	-3.53239	0.00963747
ENSG00000111110	0.165683	-2.5935	0.00970804
ENSG00000100604	0.0751616	-3.73386	0.00972515
ENSG00000172819	0.157051	-2.6707	0.00973962
ENSG00000257017	0.00289038	-8.43452	0.00975036
ENSG00000173546	0.0960811	-3.3796	0.00979677
ENSG00000173890	0.00290714	-8.42619	0.0100025
ENSG00000211445	0.103044	-3.27867	0.0100337
ENSG00000120875	0.17737	-2.49516	0.0101671
ENSG00000105329	0.123725	-3.01479	0.0103996
ENSG00000115112	0.0145357	-6.10426	0.0106265
ENSG00000186510	0.00294989	-8.40512	0.0106631
ENSG00000174469	0.194747	-2.36032	0.0108237
ENSG00000167641	0.0631166	-3.98584	0.0108751
ENSG00000103316	0.035769	-4.80515	0.0109044
ENSG00000170382	0.113553	-3.13856	0.0111966
ENSG00000138166	0.0798459	-3.64664	0.0113328
ENSG00000074211	0.0579251	-4.10967	0.0113797
ENSG00000101665	0.135863	-2.87978	0.0114672
ENSG00000182240	0.0938767	-3.41309	0.0115181
ENSG00000154122	0.0695588	-3.84562	0.011773
ENSG00000182511	0.098652	-3.34151	0.0117814
ENSG00000102575	0.0030301	-8.36642	0.0119698
ENSG00000101282	0.0611691	-4.03105	0.0120945
ENSG00000205358	0.00303928	-8.36205	0.012125
ENSG00000141655	0.0394423	-4.66411	0.0121641
ENSG00000137198	0.0097375	-6.68223	0.012187
ENSG00000164176	0.0820084	-3.60809	0.0121972
ENSG00000182472	0.0816556	-3.6143	0.012237
ENSG00000244405	0.104889	-3.25306	0.012254
ENSG00000131037	0.141564	-2.82048	0.0122831
ENSG00000185201	0.185303	-2.43204	0.0123112
ENSG00000123104	0.12338	-3.01882	0.0126669
ENSG00000188313	0.136179	-2.87642	0.0127464
ENSG00000139289	0.132875	-2.91186	0.0128969
ENSG00000178980	0.21253	-2.23426	0.0130931
ENSG00000196155	0.139198	-2.84479	0.013143
ENSG00000079739	0.205083	-2.28572	0.0133311
ENSG00000112419	0.179444	-2.4784	0.0133501
ENSG00000064763	0.0615179	-4.02285	0.0135283
ENSG00000137460	0.140847	-2.8278	0.0139521
ENSG00000113407	0.2069	-2.273	0.0139791
ENSG00000137801	0.179322	-2.47938	0.0140987
ENSG00000067057	0.212531	-2.23425	0.0146399
ENSG00000167553	0.225702	-2.14751	0.0150597
ENSG00000065923	0.125908	-2.98955	0.0152229
ENSG00000164626	0.190403	-2.39287	0.0153349
ENSG00000172818	0.0081986	-6.93041	0.0155923
ENSG00000143674	0.138786	-2.84906	0.0156483
ENSG00000175766	0.00323536	-8.27186	0.0157134
ENSG00000110719	0.145591	-2.78	0.0158898
ENSG00000154237	0.059211	-4.07799	0.0159684
ENSG00000125844	0.228657	-2.12874	0.016025
ENSG00000007264	0.122918	-3.02424	0.016072
ENSG00000163359	0.159467	-2.64867	0.0160753
ENSG00000144645	0.162652	-2.62014	0.0161638
ENSG00000043355	0.221717	-2.17321	0.0162563
ENSG00000031081	0.0543541	-4.20147	0.0163565
ENSG00000105464	0.115751	-3.11091	0.0163662
ENSG00000145536	0.080884	-3.628	0.0164414
ENSG00000179627	0.0689058	-3.85923	0.0165279
ENSG00000113749	0.0443135	-4.49611	0.016588
ENSG00000068831	0.0935319	-3.4184	0.0168748
ENSG00000111077	0.100374	-3.31654	0.0170992
ENSG00000154310	0.145213	-2.78376	0.0171096
ENSG00000155269	0.0387618	-4.68922	0.0172682
ENSG00000164007	0.11598	-3.10805	0.0175157
ENSG00000138100	0.0126957	-6.29951	0.0177956
ENSG00000171604	0.209143	-2.25744	0.0179849
ENSG00000140859	0.154839	-2.69116	0.0180619
ENSG00000090339	0.0665528	-3.90936	0.018072
ENSG00000105131	0.117452	-3.08985	0.0180964
ENSG00000149150	0.120253	-3.05585	0.0181447
ENSG00000095777	0.0182357	-5.77709	0.0182315
ENSG00000017483	0.146365	-2.77235	0.0191065
ENSG00000183569	0.0926503	-3.43206	0.0192441
ENSG00000133805	0.0469665	-4.41222	0.0193381
ENSG00000100031	0.144971	-2.78616	0.0193608
ENSG00000105514	0.17406	-2.52235	0.0193683
ENSG00000049283	0.0129917	-6.26626	0.0195105
ENSG00000115138	0.0263404	-5.24658	0.0195124
ENSG00000153443	0.157675	-2.66498	0.0196841
ENSG00000101335	0.226577	-2.14193	0.0197243
ENSG00000175906	0.170221	-2.55452	0.0198054
ENSG00000142089	0.232948	-2.10192	0.0198948
ENSG00000075673	0.0187033	-5.74057	0.0201693
ENSG00000137834	0.206611	-2.27501	0.020438
ENSG00000126218	0.0750821	-3.73539	0.0204442
ENSG00000160113	0.222627	-2.1673	0.0208808
ENSG00000104953	0.00632784	-7.30407	0.0210175
ENSG00000154080	0.0223377	-5.48438	0.0213267
ENSG00000198844	0.0207988	-5.58736	0.0217711
ENSG00000107338	0.0640745	-3.96411	0.0220314
ENSG00000079691	0.185665	-2.42922	0.0222901
ENSG00000169174	0.228292	-2.13105	0.0223371
ENSG00000138119	0.153925	-2.6997	0.0225441
ENSG00000163286	0.0113329	-6.46334	0.0225997
ENSG00000075643	0.110901	-3.17266	0.0229268
ENSG00000014216	0.247362	-2.0153	0.0230739
ENSG00000112812	0.0461132	-4.43868	0.0232232
ENSG00000086475	0.245671	-2.0252	0.0232551
ENSG00000100097	0.113901	-3.13415	0.0232942
ENSG00000164125	0.0417901	-4.5807	0.0233227
ENSG00000160963	0.236763	-2.07849	0.0233677
ENSG00000169026	0.0629417	-3.98984	0.0237574
ENSG00000157150	0	-Inf	0.0240572
ENSG00000175538	0.0115615	-6.43452	0.0243746
ENSG00000185442	0.161385	-2.63142	0.024506
ENSG00000125731	0.0766901	-3.70482	0.0245657
ENSG00000182022	0.105387	-3.24623	0.0247114
ENSG00000106785	0.152111	-2.71681	0.0248468
ENSG00000106991	0.0413407	-4.59629	0.0249025
ENSG00000007944	0.14081	-2.82818	0.0251376
ENSG00000179832	0.220526	-2.18098	0.0252193
ENSG00000150510	0.18686	-2.41997	0.0252251
ENSG00000126561	0.118875	-3.07248	0.02535
ENSG00000115648	0.0233791	-5.41864	0.0254008
ENSG00000283567	0.00367385	-8.08849	0.0255879
ENSG00000136943	0.197907	-2.33711	0.0257495
ENSG00000187634	0.0777114	-3.68573	0.025853
ENSG00000185432	0.119721	-3.06225	0.0260612
ENSG00000143819	0.199948	-2.3223	0.0266488
ENSG00000177106	0.198484	-2.3329	0.0267426
ENSG00000164344	0.00675395	-7.21005	0.0268126
ENSG00000057657	0.118858	-3.07269	0.0268643
ENSG00000130517	0.166439	-2.58694	0.0270715
ENSG00000108821	0.247579	-2.01404	0.0272013
ENSG00000171017	0.0436071	-4.51929	0.0274242
ENSG00000178078	0.150268	-2.73439	0.0274765
ENSG00000183696	0.180468	-2.47018	0.027625
ENSG00000107731	0.225056	-2.15165	0.0276674
ENSG00000087086	0.265861	-1.91125	0.0277365
ENSG00000147676	0.0320094	-4.96536	0.0281207
ENSG00000167900	0.22878	-2.12797	0.0282705
ENSG00000165912	0.227392	-2.13675	0.0284661
ENSG00000162344	0.0769536	-3.69987	0.0285536
ENSG00000139800	0.20861	-2.26112	0.0285628
ENSG00000100439	0.216522	-2.20742	0.028873
ENSG00000121207	0.058625	-4.09234	0.0297972
ENSG00000114854	0.0886339	-3.496	0.0298725
ENSG00000139725	0.180489	-2.47001	0.0299524
ENSG00000101331	0.0942009	-3.40812	0.0301005
ENSG00000157510	0.0447418	-4.48223	0.0301579
ENSG00000109625	0.0295658	-5.07993	0.0302948
ENSG00000274286	0.105101	-3.25015	0.030389
ENSG00000135547	0.0436071	-4.51929	0.0303935
ENSG00000171444	0.237438	-2.07438	0.030446
ENSG00000152137	0.0496165	-4.33304	0.030604
ENSG00000178573	0.073989	-3.75655	0.0308027
ENSG00000101347	0.205888	-2.28007	0.0308107
ENSG00000139832	0.078561	-3.67004	0.03084
ENSG00000002834	0.267349	-1.9032	0.0309504
ENSG00000117791	0.00703833	-7.15055	0.0310662
ENSG00000167315	0.16716	-2.5807	0.031321
ENSG00000125637	0.0633612	-3.98026	0.0315401
ENSG00000138759	0.271573	-1.88059	0.0316311
ENSG00000149201	0.122565	-3.02838	0.0316703
ENSG00000185585	0.17996	-2.47426	0.031758
ENSG00000119669	0.243038	-2.04075	0.031854
ENSG00000146530	0.0830478	-3.58991	0.032124
ENSG00000022556	0.250117	-1.99932	0.0323031
ENSG00000158828	0.230459	-2.11742	0.032483
ENSG00000134917	0.103972	-3.26573	0.032542
ENSG00000104321	0.00393319	-7.99009	0.0325583
ENSG00000163032	0.0620881	-4.00954	0.032692
ENSG00000159314	0.174428	-2.51929	0.0326925
ENSG00000177519	0.102014	-3.29316	0.032748
ENSG00000071282	0.101703	-3.29757	0.0330252
ENSG00000160867	0.241951	-2.04722	0.0330875
ENSG00000184792	0.115653	-3.11212	0.0331358
ENSG00000140575	0.254686	-1.97321	0.0331709
ENSG00000068697	0.234333	-2.09337	0.0336532
ENSG00000184557	0.195377	-2.35567	0.0338929
ENSG00000132849	0.20249	-2.30408	0.0340491
ENSG00000157557	0.242426	-2.04438	0.0342085
ENSG00000011347	0.209807	-2.25287	0.0344634
ENSG00000133124	0.127744	-2.96867	0.0344676
ENSG00000168004	0.00401185	-7.96152	0.0348263
ENSG00000125733	0.256962	-1.96037	0.0348657
ENSG00000166016	0.150444	-2.7327	0.0351075
ENSG00000176658	0.204402	-2.29052	0.0351079
ENSG00000128923	0.203773	-2.29497	0.0351262
ENSG00000187808	0.00729427	-7.09902	0.0351443
ENSG00000101098	0.226692	-2.1412	0.0353827
ENSG00000198417	0.0966427	-3.3712	0.0354213
ENSG00000169764	0.218062	-2.19719	0.0357434
ENSG00000196126	0.10788	-3.2125	0.035906
ENSG00000135929	0.146235	-2.77364	0.0359345
ENSG00000100889	0.243582	-2.03752	0.0359473
ENSG00000169715	0.0153358	-6.02695	0.0359612
ENSG00000145247	0.140021	-2.83628	0.036
ENSG00000111321	0.0470139	-4.41077	0.0360142
ENSG00000165929	0.0128998	-6.2765	0.0360835
ENSG00000144668	0.186018	-2.42649	0.0361163
ENSG00000105650	0.0418773	-4.57769	0.0365785
ENSG00000196502	0.0294989	-5.0832	0.0366993
ENSG00000074317	0.0406317	-4.62125	0.0371058
ENSG00000131620	0.0643347	-3.95826	0.0371084
ENSG00000131459	0.25274	-1.98428	0.0371567
ENSG00000089327	0.241366	-2.05071	0.0371948
ENSG00000117602	0.183431	-2.44669	0.0377685
ENSG00000275896	0.0315702	-4.98529	0.0381719
ENSG00000129667	0.200508	-2.31827	0.0383564
ENSG00000170412	0.182019	-2.45784	0.0384902
ENSG00000140459	0.0383154	-4.70593	0.0392661
ENSG00000107438	0.254656	-1.97338	0.0394815
ENSG00000100985	0.0264634	-5.23986	0.0395294
ENSG00000117154	0.118597	-3.07586	0.0395862
ENSG00000135253	0.202472	-2.30421	0.0398585
ENSG00000006611	0.0265334	-5.23605	0.0398835
ENSG00000227051	0.229364	-2.12429	0.0399598
ENSG00000086967	0.0457784	-4.44919	0.0399975
ENSG00000046604	0.259347	-1.94704	0.0400564
ENSG00000144476	0.182157	-2.45674	0.0401358
ENSG00000092820	0.28861	-1.79281	0.0404711
ENSG00000141736	0.293283	-1.76963	0.0405724
ENSG00000153956	0.0584605	-4.0964	0.0405823
ENSG00000159374	0.00762709	-7.03465	0.0407814
ENSG00000162105	0.265956	-1.91074	0.0410645
ENSG00000136068	0.29586	-1.75701	0.0411793
ENSG00000120833	0.191571	-2.38405	0.0414863
ENSG00000128294	0.2456	-2.02562	0.0417732
ENSG00000143375	0.270096	-1.88846	0.0422065
ENSG00000106038	0.0229905	-5.44282	0.0425641
ENSG00000160691	0.287994	-1.79589	0.042574
ENSG00000174827	0.020833	-5.58498	0.0426491
ENSG00000176920	0.0344154	-4.8608	0.0428869
ENSG00000148834	0.182357	-2.45516	0.0430973
ENSG00000128274	0.14089	-2.82736	0.0433424
ENSG00000132205	0.146387	-2.77214	0.0433434
ENSG00000008283	0.196079	-2.35049	0.0434804
ENSG00000105993	0.289281	-1.78946	0.0435628
ENSG00000186297	0.105767	-3.24104	0.0436892
ENSG00000127561	0.172384	-2.5363	0.0437525
ENSG00000170775	0.106024	-3.23754	0.0440552
ENSG00000088280	0.269262	-1.89292	0.0441282
ENSG00000130584	0.233355	-2.0994	0.04431
ENSG00000125753	0.280899	-1.83188	0.0443501
ENSG00000026559	0.257319	-1.95837	0.0448278
ENSG00000179855	0.0313426	-4.99573	0.0449993
ENSG00000141753	0.284083	-1.81562	0.0451861
ENSG00000125378	0.1656	-2.59422	0.0454951
ENSG00000171314	0.303127	-1.722	0.045972
ENSG00000172216	0.104844	-3.25369	0.0460721
ENSG00000142102	0.289017	-1.79078	0.0461699
ENSG00000185156	0.01393	-6.16566	0.0464963
ENSG00000125148	0.0923407	-3.43689	0.046623
ENSG00000204634	0.216857	-2.20519	0.0467685
ENSG00000185527	0.0278601	-5.16566	0.0468491
ENSG00000171766	0.177533	-2.49384	0.0469737
ENSG00000197837	0.287995	-1.79588	0.0471448
ENSG00000237172	0.178938	-2.48247	0.0472043
ENSG00000174567	0	-Inf	0.0474111
ENSG00000132561	0.120758	-3.04981	0.0475006
ENSG00000159214	0.158656	-2.65602	0.0477426
ENSG00000066735	0.292181	-1.77507	0.0482804
ENSG00000179044	0.0112272	-6.47686	0.0484918
ENSG00000130733	0.261457	-1.93536	0.0487349
ENSG00000108518	0.307268	-1.70243	0.0487698
ENSG00000205277	0.0630433	-3.98751	0.048984
ENSG00000113580	0.0112692	-6.47147	0.0490626
ENSG00000185070	0.127532	-2.97107	0.0494873
ENSG00000124313	0.227508	-2.13601	0.0495463
ENSG00000158473	0.00812115	-6.9441	0.0497898

## Sheet: D12 vs D0 up
id	foldChange	log2FoldChange	pval
ENSG00000197921	477.585	8.89961	7.6431e-12
ENSG00000170689	459.834	8.84497	1.25822e-11
ENSG00000178403	914.575	9.83696	2.93566e-11
ENSG00000163395	486.683	8.92684	5.8306e-11
ENSG00000128652	627.388	9.29322	3.69157e-10
ENSG00000198353	501.147	8.96909	6.75489e-10
ENSG00000120093	196.344	7.61724	9.58896e-10
ENSG00000152784	592.319	9.21023	9.92034e-10
ENSG00000105997	957.313	9.90285	1.74622e-09
ENSG00000182742	181.379	7.50287	2.89907e-09
ENSG00000184486	180.165	7.49318	4.35898e-09
ENSG00000205683	318.352	8.31448	4.75247e-09
ENSG00000123307	389.766	8.60647	5.04257e-09
ENSG00000163623	241.724	7.91722	8.80496e-09
ENSG00000173110	2344.35	11.195	1.43503e-08
ENSG00000105991	493.375	8.94654	1.83969e-08
ENSG00000155511	195.943	7.61429	1.91662e-08
ENSG00000148826	1253.99	10.2923	1.99928e-08
ENSG00000109991	210.972	7.72091	2.12779e-08
ENSG00000147488	1204.72	10.2345	2.88691e-08
ENSG00000179981	126.795	6.98636	3.37916e-08
ENSG00000104435	156.93	7.29398	1.18371e-07
ENSG00000111783	144.363	7.17356	1.44971e-07
ENSG00000175745	78.8781	6.30155	1.8238e-07
ENSG00000278500	707.85	9.4673	1.83325e-07
ENSG00000120068	138.752	7.11636	1.931e-07
ENSG00000109906	72.8018	6.1859	2.78924e-07
ENSG00000122592	934.221	9.86762	2.86305e-07
ENSG00000171786	101.149	6.66034	3.31736e-07
ENSG00000143995	76.4768	6.25695	3.95673e-07
ENSG00000112139	62.1931	5.95868	4.95366e-07
ENSG00000151892	64.9095	6.02036	5.28524e-07
ENSG00000171094	65.3701	6.03056	5.63724e-07
ENSG00000162873	73.708	6.20375	6.19855e-07
ENSG00000140067	1543.84	10.5923	6.50352e-07
ENSG00000005102	193.354	7.5951	6.97171e-07
ENSG00000162992	588.507	9.20091	9.11769e-07
ENSG00000197757	98.1577	6.61703	9.34081e-07
ENSG00000262655	46.3561	5.53469	1.01925e-06
ENSG00000157851	43.2232	5.43373	1.0241e-06
ENSG00000165973	216.481	7.7581	1.38185e-06
ENSG00000185386	62.029	5.95487	1.80786e-06
ENSG00000184221	85.1599	6.4121	1.92441e-06
ENSG00000120094	66.5976	6.0574	1.93983e-06
ENSG00000149294	39.1361	5.29043	2.21712e-06
ENSG00000159409	112.664	6.81589	2.95873e-06
ENSG00000156395	89.2769	6.48021	3.12026e-06
ENSG00000078018	64.4916	6.01104	3.43934e-06
ENSG00000036448	88.9797	6.4754	3.49121e-06
ENSG00000182463	97.7512	6.61104	3.69231e-06
ENSG00000041515	131.998	7.04438	4.24265e-06
ENSG00000140836	34.2191	5.09673	4.45776e-06
ENSG00000136099	42.9933	5.42604	5.49483e-06
ENSG00000114115	30.6582	4.9382	6.10855e-06
ENSG00000119614	1184.05	10.2095	6.1955e-06
ENSG00000134595	36.3304	5.1831	6.36709e-06
ENSG00000134138	37.2958	5.22094	6.47796e-06
ENSG00000148053	120.472	6.91256	6.61331e-06
ENSG00000187122	34.6395	5.11435	7.11619e-06
ENSG00000148516	43.2015	5.43301	7.33166e-06
ENSG00000164330	96.9604	6.59932	8.73832e-06
ENSG00000181965	1134.79	10.1482	8.74337e-06
ENSG00000107796	48.5824	5.60236	9.27623e-06
ENSG00000198719	30.8285	4.94619	9.44849e-06
ENSG00000205336	37.7158	5.2371	9.79929e-06
ENSG00000184144	53.1948	5.73321	1.01183e-05
ENSG00000144834	38.9526	5.28365	1.13928e-05
ENSG00000164929	84.7243	6.4047	1.14304e-05
ENSG00000154764	136.79	7.09582	1.37421e-05
ENSG00000244694	61.7696	5.94883	1.4055e-05
ENSG00000198914	220.297	7.78331	1.40961e-05
ENSG00000128917	62.8723	5.97435	1.41154e-05
ENSG00000173917	52.1016	5.70326	1.41522e-05
ENSG00000276644	65.3477	6.03007	1.41967e-05
ENSG00000165655	42.1916	5.39888	1.4269e-05
ENSG00000196361	46.0366	5.52471	1.45275e-05
ENSG00000077279	40.9582	5.35608	1.50396e-05
ENSG00000162374	158.742	7.31054	1.51028e-05
ENSG00000171956	35.2512	5.1396	1.56729e-05
ENSG00000110042	24.1469	4.59376	1.77988e-05
ENSG00000169856	31.6159	4.98258	1.81014e-05
ENSG00000198729	175.643	7.4565	2.00301e-05
ENSG00000205927	35.7078	5.15817	2.34681e-05
ENSG00000166450	23.2726	4.54056	2.39453e-05
ENSG00000165556	44.1993	5.46595	2.4845e-05
ENSG00000139445	49.6287	5.6331	2.52363e-05
ENSG00000111432	49.1365	5.61872	2.92343e-05
ENSG00000139767	28.6199	4.83895	3.09625e-05
ENSG00000169554	26.2852	4.71618	3.11359e-05
ENSG00000160097	31.5973	4.98173	3.18557e-05
ENSG00000167614	21.3778	4.41804	3.56148e-05
ENSG00000173376	52.4667	5.71333	3.8498e-05
ENSG00000122756	24.989	4.64322	3.90512e-05
ENSG00000217236	918.387	9.84296	4.49264e-05
ENSG00000107187	Inf	Inf	4.91642e-05
ENSG00000092969	52.745	5.72096	5.78971e-05
ENSG00000165495	20.688	4.37072	7.33213e-05
ENSG00000181234	24.616	4.62152	7.60244e-05
ENSG00000037965	60.6226	5.92178	7.77154e-05
ENSG00000005020	37.0965	5.21321	8.68307e-05
ENSG00000155093	25.2908	4.66054	9.40502e-05
ENSG00000124762	18.2576	4.19043	9.72915e-05
ENSG00000119547	24.4233	4.61018	9.80496e-05
ENSG00000129159	40.8664	5.35284	0.000100886
ENSG00000162706	21.0278	4.39422	0.000109951
ENSG00000110900	19.4971	4.28519	0.000111244
ENSG00000144218	49.223	5.62126	0.000119884
ENSG00000117707	26.5118	4.72856	0.00012328
ENSG00000108001	40.7402	5.34838	0.000123521
ENSG00000104490	35.8416	5.16356	0.000129741
ENSG00000125618	84.9151	6.40795	0.000156158
ENSG00000196220	15.821	3.98377	0.000159859
ENSG00000118432	29.9406	4.90403	0.000164677
ENSG00000156427	45.9729	5.52271	0.000170053
ENSG00000170166	296.746	8.21308	0.000181098
ENSG00000085563	171.831	7.42485	0.000188766
ENSG00000163273	34.7474	5.11883	0.000193314
ENSG00000144857	15.3406	3.93929	0.0001967
ENSG00000115266	16.9443	4.08273	0.000204626
ENSG00000188290	17.3014	4.11282	0.000213604
ENSG00000106006	288.829	8.17407	0.000217088
ENSG00000111218	20.8169	4.37968	0.00021768
ENSG00000198732	21.6011	4.43303	0.000219567
ENSG00000141622	16.605	4.05354	0.000227086
ENSG00000121454	74.171	6.21278	0.000233912
ENSG00000167178	56.2692	5.81427	0.000251626
ENSG00000181291	35.5471	5.15166	0.000254964
ENSG00000148204	13.4968	3.75455	0.000295802
ENSG00000141314	13.2407	3.72691	0.000327992
ENSG00000166963	14.9195	3.89913	0.000341151
ENSG00000175093	13.3859	3.74264	0.00036115
ENSG00000149527	62.8972	5.97492	0.000363632
ENSG00000178235	66.284	6.05059	0.000383235
ENSG00000118495	18.6666	4.22238	0.000389758
ENSG00000145920	32.393	5.01761	0.000400695
ENSG00000103187	12.2818	3.61845	0.000401948
ENSG00000015592	97.6446	6.60947	0.000421638
ENSG00000185920	12.3707	3.62886	0.000425056
ENSG00000189056	21.9864	4.45854	0.00042836
ENSG00000168772	20.9443	4.38849	0.000430465
ENSG00000170549	17.9863	4.16883	0.000430591
ENSG00000173267	16.3392	4.03026	0.000436848
ENSG00000185551	20.6028	4.36477	0.000445049
ENSG00000164434	24.0373	4.5872	0.000479802
ENSG00000002933	169.954	7.409	0.000494234
ENSG00000176771	25.1673	4.65348	0.000514667
ENSG00000163909	18.0568	4.17447	0.000524126
ENSG00000240694	15.8822	3.98934	0.000549553
ENSG00000169085	66.5137	6.05558	0.000568275
ENSG00000125398	14.6706	3.87485	0.000639043
ENSG00000165023	52.3938	5.71132	0.000668702
ENSG00000143333	13.4563	3.75021	0.000687311
ENSG00000100987	335.158	8.3887	0.000704307
ENSG00000107742	17.721	4.14739	0.000730851
ENSG00000174498	10.6908	3.4183	0.000733968
ENSG00000170390	30.7456	4.94231	0.000738175
ENSG00000007372	11.9659	3.58086	0.000745629
ENSG00000160145	11.2668	3.49401	0.000793469
ENSG00000132639	91.7507	6.51965	0.000918931
ENSG00000150687	12.1804	3.60649	0.000943425
ENSG00000170989	32.601	5.02684	0.000966123
ENSG00000182985	11.5675	3.53201	0.000973247
ENSG00000121297	16.497	4.04413	0.0010102
ENSG00000106004	67.5009	6.07683	0.00106078
ENSG00000090932	12.8366	3.68219	0.00109197
ENSG00000212719	55.4639	5.79348	0.00109231
ENSG00000165194	14.9078	3.89799	0.0011029
ENSG00000067798	32.9038	5.04018	0.00110915
ENSG00000144596	10.8597	3.44092	0.00113891
ENSG00000188483	12.7139	3.66833	0.00118648
ENSG00000090097	9.93051	3.31187	0.00119149
ENSG00000064651	11.0363	3.46419	0.00121076
ENSG00000143195	16.3332	4.02973	0.00123923
ENSG00000162545	15.2612	3.9318	0.00126481
ENSG00000277531	19.0337	4.25048	0.00126516
ENSG00000168874	20.0537	4.3258	0.001306
ENSG00000182968	42.255	5.40105	0.00133768
ENSG00000173404	55.281	5.78871	0.00134184
ENSG00000110436	19.8113	4.30825	0.00136372
ENSG00000114541	15.5262	3.95663	0.00139041
ENSG00000168993	44.6946	5.48203	0.00142614
ENSG00000205922	539.244	9.0748	0.0014418
ENSG00000182175	9.15987	3.19533	0.00152667
ENSG00000180806	165.38	7.36964	0.00161087
ENSG00000141431	25.8956	4.69464	0.00162275
ENSG00000076356	8.97025	3.16515	0.00164027
ENSG00000104722	10.2623	3.35929	0.00169336
ENSG00000106565	37.2398	5.21877	0.0017284
ENSG00000269891	521.651	9.02694	0.00173239
ENSG00000078399	81.5464	6.34955	0.00178512
ENSG00000064692	13.5727	3.76263	0.00181209
ENSG00000105996	509.335	8.99247	0.00197267
ENSG00000187323	31.48	4.97636	0.00197585
ENSG00000172667	12.5963	3.65493	0.00198616
ENSG00000171004	11.711	3.54979	0.00202072
ENSG00000064300	9.82355	3.29624	0.0020437
ENSG00000183779	10.0956	3.33566	0.00205856
ENSG00000100234	12.4953	3.64331	0.00211731
ENSG00000260027	91.1569	6.51028	0.00233767
ENSG00000141449	9.63486	3.26826	0.00255224
ENSG00000069188	7.9894	2.99809	0.00256743
ENSG00000171843	16.3736	4.0333	0.00259553
ENSG00000120278	14.5099	3.85897	0.00265576
ENSG00000103260	8.96324	3.16402	0.00270103
ENSG00000134686	8.26588	3.04717	0.00271769
ENSG00000203867	10.0453	3.32845	0.00303236
ENSG00000174721	8.17455	3.03114	0.00307741
ENSG00000085276	36.4125	5.18636	0.00326554
ENSG00000187957	44.9517	5.4903	0.00334515
ENSG00000184185	9.76462	3.28756	0.00339263
ENSG00000125869	19.4484	4.28158	0.00348577
ENSG00000158258	10.4311	3.38282	0.00350609
ENSG00000134121	179.162	7.48512	0.00355656
ENSG00000147509	44.2919	5.46897	0.00360159
ENSG00000180011	10.288	3.36289	0.00378536
ENSG00000113231	25.9038	4.69509	0.00380456
ENSG00000102678	117.877	6.88114	0.00384182
ENSG00000132718	11.1754	3.48226	0.00386595
ENSG00000105290	7.96103	2.99296	0.00390304
ENSG00000134775	8.02398	3.00432	0.00403013
ENSG00000115902	13.7745	3.78393	0.00411632
ENSG00000153976	10.0587	3.33037	0.00416113
ENSG00000281873	Inf	Inf	0.00421093
ENSG00000250091	11.5406	3.52864	0.00441891
ENSG00000204882	11.8336	3.56482	0.00456011
ENSG00000152217	7.88826	2.97971	0.00469908
ENSG00000123080	63.0971	5.9795	0.00471153
ENSG00000260903	8.52221	3.09123	0.00485593
ENSG00000188763	9.65965	3.27197	0.0048899
ENSG00000163449	11.1426	3.47802	0.00490083
ENSG00000095713	17.7675	4.15117	0.0049111
ENSG00000277586	7.65875	2.93711	0.00505905
ENSG00000215397	29.9891	4.90637	0.00512335
ENSG00000159388	7.76502	2.95699	0.00513407
ENSG00000177508	8.87051	3.14902	0.00515293
ENSG00000111859	8.66547	3.11528	0.00555378
ENSG00000143126	6.59941	2.72234	0.00556828
ENSG00000112539	24.1339	4.59299	0.00563994
ENSG00000183273	44.7602	5.48415	0.00577065
ENSG00000026103	38.7897	5.2776	0.00585251
ENSG00000266074	6.73512	2.7517	0.00595067
ENSG00000151640	7.23585	2.85516	0.00597673
ENSG00000167552	6.44518	2.68822	0.0060096
ENSG00000091129	8.58128	3.10119	0.00604749
ENSG00000145632	8.56769	3.09891	0.00637857
ENSG00000182752	10.5987	3.40582	0.00659938
ENSG00000177519	7.563	2.91896	0.00663557
ENSG00000125430	8.15883	3.02836	0.00663745
ENSG00000135454	13.158	3.71787	0.00664701
ENSG00000152092	8.03004	3.00541	0.00668207
ENSG00000163638	6.71071	2.74647	0.00680785
ENSG00000242732	11.6281	3.53955	0.0072139
ENSG00000165633	15.2957	3.93505	0.00723422
ENSG00000149243	19.8152	4.30853	0.00732529
ENSG00000188211	14.1361	3.82131	0.00733859
ENSG00000117425	12.0619	3.59238	0.00753759
ENSG00000120075	42.0177	5.39293	0.00771706
ENSG00000100647	7.99094	2.99836	0.00772229
ENSG00000081479	8.66486	3.11518	0.0077551
ENSG00000163132	12.2114	3.61015	0.0081071
ENSG00000152583	59.7303	5.90039	0.0083435
ENSG00000182580	6.60707	2.72401	0.00858272
ENSG00000198886	6.11511	2.61238	0.00870777
ENSG00000129993	12.6766	3.6641	0.00872377
ENSG00000074416	26.6303	4.735	0.00879667
ENSG00000106829	6.42384	2.68344	0.00903599
ENSG00000047634	34.1076	5.09202	0.00913032
ENSG00000176842	11.9744	3.58189	0.0093663
ENSG00000108511	17.3349	4.11561	0.0094071
ENSG00000198873	7.70277	2.94538	0.00944995
ENSG00000167992	6.74049	2.75285	0.00958254
ENSG00000066056	11.3554	3.50531	0.00964804
ENSG00000184232	9.67293	3.27395	0.0097911
ENSG00000144476	6.28914	2.65286	0.00982986
ENSG00000124635	5.77072	2.52875	0.00988735
ENSG00000166111	35.6271	5.1549	0.00991071
ENSG00000075461	8.97216	3.16546	0.0101375
ENSG00000079931	11.2241	3.48852	0.0103475
ENSG00000179455	359.79	8.49101	0.010492
ENSG00000185650	5.66334	2.50165	0.0107079
ENSG00000151320	16.8045	4.07078	0.0107368
ENSG00000172379	6.34383	2.66535	0.01074
ENSG00000183018	9.22835	3.20607	0.0107499
ENSG00000116117	7.54424	2.91538	0.0109584
ENSG00000165300	7.36069	2.87984	0.0115011
ENSG00000116035	Inf	Inf	0.0115141
ENSG00000103056	15.7243	3.97492	0.0124868
ENSG00000180891	6.30479	2.65645	0.0126999
ENSG00000131711	5.31603	2.41035	0.0127519
ENSG00000198435	6.60704	2.724	0.0129193
ENSG00000187714	Inf	Inf	0.0129803
ENSG00000137166	5.51482	2.46331	0.0132751
ENSG00000157570	5.45133	2.44661	0.0134366
ENSG00000114646	8.58403	3.10166	0.0135589
ENSG00000140557	6.89615	2.78579	0.0141345
ENSG00000047648	11.4359	3.51549	0.0145393
ENSG00000090776	5.54437	2.47102	0.0145489
ENSG00000134291	8.42027	3.07387	0.015072
ENSG00000185565	7.90634	2.98301	0.0152252
ENSG00000108551	8.20833	3.03709	0.0152358
ENSG00000234444	15.7801	3.98004	0.0153453
ENSG00000180447	7.79741	2.96299	0.0153843
ENSG00000137868	5.60748	2.48735	0.0155237
ENSG00000198756	6.94984	2.79698	0.0159871
ENSG00000087303	5.72714	2.51781	0.0160401
ENSG00000149289	6.94495	2.79596	0.0162587
ENSG00000159713	7.32245	2.87233	0.0165555
ENSG00000101198	6.74091	2.75294	0.0167219
ENSG00000008735	8.19732	3.03515	0.0168222
ENSG00000117971	7.85122	2.97292	0.0168549
ENSG00000186732	19.9537	4.31859	0.0169808
ENSG00000129116	5.43703	2.44282	0.0169862
ENSG00000055118	6.07144	2.60204	0.0169877
ENSG00000197852	5.7849	2.53229	0.0172373
ENSG00000188897	7.80538	2.96447	0.0172412
ENSG00000117461	5.78593	2.53255	0.0174945
ENSG00000179546	7.29179	2.86627	0.0175743
ENSG00000099338	7.41906	2.89124	0.0176096
ENSG00000196767	29.9929	4.90655	0.0176504
ENSG00000077092	10.2368	3.3557	0.0178903
ENSG00000214456	9.71914	3.28083	0.017898
ENSG00000198727	5.21939	2.38388	0.0180387
ENSG00000196208	4.91967	2.29856	0.0182201
ENSG00000175197	8.53602	3.09356	0.0183608
ENSG00000111186	6.84153	2.77432	0.0186076
ENSG00000100626	6.8942	2.78538	0.0186238
ENSG00000128594	6.0901	2.60647	0.0186274
ENSG00000075891	24.5368	4.61688	0.0187829
ENSG00000143320	4.80361	2.26412	0.019044
ENSG00000117394	4.79649	2.26198	0.01909
ENSG00000171016	13.511	3.75606	0.0193411
ENSG00000115758	5.01595	2.32652	0.0193562
ENSG00000114126	4.93183	2.30212	0.0205882
ENSG00000158816	7.81717	2.96665	0.0207777
ENSG00000271254	5.79962	2.53596	0.0209364
ENSG00000128645	166.7	7.38111	0.0209719
ENSG00000131080	6.97752	2.80272	0.0214063
ENSG00000137142	5.48122	2.4545	0.0216601
ENSG00000060709	12.1222	3.59958	0.0217077
ENSG00000126603	4.96822	2.31273	0.0217484
ENSG00000179242	5.09361	2.34869	0.0221977
ENSG00000171533	9.13802	3.19188	0.0226177
ENSG00000225968	5.57981	2.48022	0.0232061
ENSG00000131759	4.98427	2.31738	0.0232658
ENSG00000146592	12.7721	3.67492	0.0233283
ENSG00000166165	4.53966	2.18259	0.0233723
ENSG00000174672	5.01258	2.32555	0.0235637
ENSG00000163873	6.33483	2.66331	0.023881
ENSG00000140937	5.22355	2.38503	0.0239219
ENSG00000116574	5.22222	2.38466	0.0239247
ENSG00000144485	5.00989	2.32478	0.0240658
ENSG00000163661	17.6755	4.14368	0.0242227
ENSG00000119242	5.636	2.49467	0.0244836
ENSG00000198899	4.79786	2.26239	0.0246058
ENSG00000113369	7.74796	2.95382	0.0251735
ENSG00000108557	4.67827	2.22597	0.0253614
ENSG00000198763	4.89199	2.29042	0.0254606
ENSG00000171791	7.83112	2.96922	0.0255162
ENSG00000261678	16.1395	4.01252	0.0256265
ENSG00000130766	4.82943	2.27185	0.026273
ENSG00000108387	7.41495	2.89044	0.026551
ENSG00000170091	52.5609	5.71592	0.0267536
ENSG00000161896	35.2501	5.13955	0.0268312
ENSG00000185088	6.77621	2.76048	0.0268639
ENSG00000102034	7.82389	2.96789	0.0268875
ENSG00000148798	5.61793	2.49004	0.0270287
ENSG00000147234	9.02984	3.1747	0.0270993
ENSG00000169862	4.83051	2.27218	0.0272301
ENSG00000149295	13.8904	3.79602	0.0274338
ENSG00000081138	14.2687	3.83478	0.0274595
ENSG00000172458	23.7514	4.56994	0.0277109
ENSG00000048052	5.49863	2.45907	0.0282942
ENSG00000087495	15.6368	3.96687	0.02872
ENSG00000196776	6.50318	2.70114	0.0288271
ENSG00000164651	4.98388	2.31727	0.0289585
ENSG00000115109	4.65517	2.21883	0.0293078
ENSG00000112541	6.17896	2.62736	0.0293496
ENSG00000146197	5.409	2.43536	0.0294919
ENSG00000122367	12.9365	3.69337	0.0296117
ENSG00000187260	4.48578	2.16536	0.0296122
ENSG00000138136	Inf	Inf	0.0296709
ENSG00000177182	108.494	6.76147	0.0297696
ENSG00000139910	6.2462	2.64298	0.0310498
ENSG00000188130	4.41788	2.14335	0.0312431
ENSG00000156011	4.58139	2.19579	0.0317439
ENSG00000133056	4.31253	2.10853	0.0318435
ENSG00000172789	39.6656	5.30982	0.0320844
ENSG00000163297	6.28344	2.65155	0.0322789
ENSG00000106003	4.38767	2.13346	0.0325357
ENSG00000104967	4.6369	2.21316	0.0329528
ENSG00000183044	5.44121	2.44393	0.0329611
ENSG00000132688	4.09042	2.03225	0.0330576
ENSG00000138795	6.70101	2.74438	0.0330927
ENSG00000101265	5.03917	2.33319	0.033098
ENSG00000172201	5.19801	2.37796	0.0334012
ENSG00000189184	4.75425	2.24922	0.0335735
ENSG00000173846	5.1969	2.37765	0.0337493
ENSG00000180530	7.05944	2.81955	0.0339665
ENSG00000154529	7.57603	2.92144	0.0345861
ENSG00000167676	6.68108	2.74008	0.0350177
ENSG00000213088	82.2502	6.36195	0.0351135
ENSG00000198400	14.5851	3.86642	0.0351668
ENSG00000107105	7.95828	2.99246	0.0352203
ENSG00000198720	4.52327	2.17737	0.0359882
ENSG00000055163	4.15344	2.05431	0.0367162
ENSG00000101670	5.04984	2.33624	0.0368104
ENSG00000150551	9.72676	3.28196	0.0371619
ENSG00000168918	5.23896	2.38928	0.0374674
ENSG00000175356	8.36607	3.06455	0.0376444
ENSG00000169122	5.27657	2.3996	0.0378832
ENSG00000080298	4.84833	2.27749	0.0380837
ENSG00000169252	15.0328	3.91004	0.038941
ENSG00000205363	5.81364	2.53944	0.03902
ENSG00000080644	8.86775	3.14857	0.0390905
ENSG00000125851	8.66824	3.11574	0.0392802
ENSG00000100592	4.70353	2.23374	0.0393289
ENSG00000127863	5.66202	2.50132	0.0396343
ENSG00000175879	Inf	Inf	0.0397933
ENSG00000189077	4.93267	2.30237	0.0400586
ENSG00000214595	11.317	3.50042	0.0402069
ENSG00000110881	4.91754	2.29794	0.0414926
ENSG00000149571	10.7431	3.42534	0.0417983
ENSG00000144908	9.63206	3.26784	0.0422088
ENSG00000175866	4.25122	2.08788	0.0422496
ENSG00000183283	4.74624	2.24678	0.0423322
ENSG00000132669	6.2894	2.65292	0.0430058
ENSG00000197576	243.672	7.92879	0.0436177
ENSG00000165156	12.229	3.61224	0.0437298
ENSG00000163531	4.02116	2.00761	0.0437661
ENSG00000100503	3.974	1.99059	0.0443094
ENSG00000179604	4.03418	2.01228	0.0448283
ENSG00000109265	3.96643	1.98784	0.0448356
ENSG00000219481	4.07569	2.02704	0.0452556
ENSG00000168505	6.46311	2.69223	0.0453447
ENSG00000170500	14.3486	3.84284	0.0453453
ENSG00000162981	5.58142	2.48063	0.0457971
ENSG00000164867	4.69887	2.23231	0.0458243
ENSG00000072182	15.541	3.95801	0.0459536
ENSG00000140481	4.83959	2.27488	0.0463916
ENSG00000168702	94.7123	6.56548	0.0465011
ENSG00000123454	28.2671	4.82105	0.0480257
ENSG00000120889	3.72984	1.89911	0.0489844
ENSG00000277075	3.66562	1.87406	0.0491097
ENSG00000026025	3.65118	1.86836	0.0496778

## Sheet: D12 vs D0 down
id	foldChange	log2FoldChange	pval
ENSG00000204531	0.00334628	-8.22323	5.3018e-11
ENSG00000130182	0.00333102	-8.22982	1.99813e-10
ENSG00000133980	0.00308926	-8.33852	2.26126e-10
ENSG00000179059	0.00246986	-8.66136	4.86956e-10
ENSG00000160973	0.00275167	-8.50548	5.75722e-10
ENSG00000146904	0.00459095	-7.76699	1.37151e-09
ENSG00000147596	0.00370782	-8.07521	5.88641e-09
ENSG00000101276	0.00066769	-10.5485	8.30111e-09
ENSG00000165905	0.00283281	-8.46355	9.72835e-09
ENSG00000170373	0.00653385	-7.25785	1.11617e-08
ENSG00000161249	0.00650831	-7.2635	1.27623e-08
ENSG00000241186	0.00644076	-7.27855	1.35492e-08
ENSG00000111319	0.00609338	-7.35854	1.92552e-08
ENSG00000184697	0.00968507	-6.69002	2.92861e-08
ENSG00000141738	0.00207542	-8.91238	4.33959e-08
ENSG00000167600	0.0103856	-6.58927	5.73067e-08
ENSG00000110148	0.00762017	-7.03596	6.37542e-08
ENSG00000050555	0.00618962	-7.33593	6.79073e-08
ENSG00000164736	0.00479447	-7.70441	9.21925e-08
ENSG00000119866	0.00122008	-9.6788	1.05227e-07
ENSG00000133477	0.00781071	-7.00033	1.31097e-07
ENSG00000156966	0.0111128	-6.49163	1.31138e-07
ENSG00000182866	0.00341182	-8.19524	1.37775e-07
ENSG00000154783	0.00632864	-7.30389	1.40368e-07
ENSG00000142273	0.00127428	-9.6161	1.55454e-07
ENSG00000128052	0.00805837	-6.9553	1.72362e-07
ENSG00000130768	0.00458964	-7.7674	1.98495e-07
ENSG00000039068	0.0132625	-6.23651	2.28515e-07
ENSG00000104413	0.00572262	-7.44911	2.52558e-07
ENSG00000111704	0.00284686	-8.45641	2.93537e-07
ENSG00000131203	0.000553607	-10.8189	3.5803e-07
ENSG00000052344	0.0127757	-6.29046	4.03799e-07
ENSG00000165588	0.00650723	-7.26374	4.84967e-07
ENSG00000131969	0.00302686	-8.36796	4.91366e-07
ENSG00000129354	0.00937863	-6.73641	5.29766e-07
ENSG00000105707	0.00538812	-7.536	5.44241e-07
ENSG00000041982	0.0167088	-5.90325	5.95351e-07
ENSG00000159618	0.000586454	-10.7357	6.00183e-07
ENSG00000083307	0.0063534	-7.29826	6.71393e-07
ENSG00000065361	0.0133303	-6.22915	7.24968e-07
ENSG00000103067	0.0105905	-6.56109	7.58631e-07
ENSG00000010278	0.00962151	-6.69952	8.76705e-07
ENSG00000092758	0.0165707	-5.91522	8.81803e-07
ENSG00000188112	0.0140935	-6.14882	1.01577e-06
ENSG00000102755	0.00420169	-7.89481	1.20785e-06
ENSG00000050327	0.00874338	-6.83759	1.35879e-06
ENSG00000148357	0.0210836	-5.56773	1.71927e-06
ENSG00000163508	0.010158	-6.62124	1.73591e-06
ENSG00000108950	0.00568683	-7.45816	1.90479e-06
ENSG00000130203	0.0257353	-5.28011	1.91463e-06
ENSG00000120949	0.0075678	-7.04591	2.10809e-06
ENSG00000198286	0.0107278	-6.5425	2.3604e-06
ENSG00000136110	0.00333935	-8.22622	2.42952e-06
ENSG00000136574	0.0134874	-6.21224	2.62266e-06
ENSG00000106538	0.0155849	-6.00371	2.80198e-06
ENSG00000069482	0.0150098	-6.05795	3.41494e-06
ENSG00000077009	0.00830792	-6.9113	3.55771e-06
ENSG00000179023	0.00357594	-8.12746	4.22311e-06
ENSG00000105048	0.0166804	-5.9057	4.3479e-06
ENSG00000124225	0.00819897	-6.93034	4.58131e-06
ENSG00000116774	0.0218905	-5.51355	5.29225e-06
ENSG00000124839	0.0227467	-5.4582	5.58014e-06
ENSG00000163694	0.0204577	-5.61121	5.77279e-06
ENSG00000158825	0.000778479	-10.3271	6.79843e-06
ENSG00000101076	0.012807	-6.28692	6.97928e-06
ENSG00000163359	0.011042	-6.50085	7.27307e-06
ENSG00000141448	0.0181623	-5.78291	7.51639e-06
ENSG00000154096	0.0329031	-4.92563	8.84605e-06
ENSG00000166145	0.028428	-5.13654	9.33301e-06
ENSG00000050344	0.0108929	-6.52047	9.33553e-06
ENSG00000158246	0.0265477	-5.23527	9.68504e-06
ENSG00000119888	0.0263113	-5.24817	9.71365e-06
ENSG00000170190	0.0140188	-6.15649	9.78063e-06
ENSG00000128610	0.00476935	-7.71199	9.83762e-06
ENSG00000185885	0.0260582	-5.26212	1.02054e-05
ENSG00000171345	0.0327654	-4.93168	1.05657e-05
ENSG00000140832	0.00772026	-7.01713	1.09595e-05
ENSG00000240563	0.0329571	-4.92327	1.10595e-05
ENSG00000118137	0.0214474	-5.54305	1.14352e-05
ENSG00000163501	0.00659996	-7.24333	1.15618e-05
ENSG00000185101	0.0072105	-7.11569	1.16044e-05
ENSG00000141934	0.0196349	-5.67044	1.17174e-05
ENSG00000136383	0.0338481	-4.88478	1.17848e-05
ENSG00000008516	0.00911792	-6.77708	1.20416e-05
ENSG00000158815	0.0292135	-5.09722	1.21236e-05
ENSG00000073350	0.0266849	-5.22783	1.24163e-05
ENSG00000181885	0.0141187	-6.14625	1.26458e-05
ENSG00000128849	0.0329851	-4.92204	1.26881e-05
ENSG00000163251	0.0373061	-4.74444	1.27761e-05
ENSG00000151650	0.00733449	-7.09109	1.31658e-05
ENSG00000156574	0.0143551	-6.12229	1.31782e-05
ENSG00000101194	0.0131057	-6.25366	1.45826e-05
ENSG00000135919	0.0338083	-4.88648	1.48119e-05
ENSG00000179344	0.00778074	-7.00588	1.52107e-05
ENSG00000243709	0.0214745	-5.54123	1.60928e-05
ENSG00000138650	0.0317653	-4.9764	1.62007e-05
ENSG00000007264	0.00657989	-7.24772	1.6368e-05
ENSG00000198682	0.00979237	-6.67413	1.66746e-05
ENSG00000090530	0.0251475	-5.31344	1.86575e-05
ENSG00000042493	0.0217611	-5.52211	1.97102e-05
ENSG00000164142	0.0106182	-6.55731	2.09636e-05
ENSG00000198626	0.0145589	-6.10196	2.11527e-05
ENSG00000205517	0.0200195	-5.64245	2.14218e-05
ENSG00000135063	0.00233131	-8.74464	2.46065e-05
ENSG00000118898	0.0320963	-4.96145	2.4659e-05
ENSG00000156453	0.0402333	-4.63547	2.54139e-05
ENSG00000049089	0.0374489	-4.73893	2.55452e-05
ENSG00000183778	0.0313437	-4.99568	2.61006e-05
ENSG00000130303	0.0353478	-4.82223	2.68123e-05
ENSG00000171724	0.0300815	-5.05498	2.69408e-05
ENSG00000179046	0.000933844	-10.0645	2.87806e-05
ENSG00000176720	0.0251843	-5.31133	3.0127e-05
ENSG00000159166	0.0119488	-6.38699	3.02242e-05
ENSG00000147869	0.0403545	-4.63113	3.14004e-05
ENSG00000166105	0.0132049	-6.24278	3.16051e-05
ENSG00000043143	0.030124	-5.05294	3.21137e-05
ENSG00000185155	0.00602521	-7.37477	3.25002e-05
ENSG00000186340	0.0125727	-6.31357	3.2677e-05
ENSG00000173281	0.0291898	-5.09839	3.2801e-05
ENSG00000092068	0.038659	-4.69305	3.34107e-05
ENSG00000182107	0	-Inf	3.57083e-05
ENSG00000118640	0.0131051	-6.25373	3.8175e-05
ENSG00000106631	0.0107392	-6.54097	3.84442e-05
ENSG00000170542	0.0343898	-4.86188	3.97963e-05
ENSG00000101335	0.0402643	-4.63435	4.13839e-05
ENSG00000127831	0.0132719	-6.23548	4.15955e-05
ENSG00000163191	0.0256499	-5.2849	4.40131e-05
ENSG00000104518	0.0192885	-5.69612	4.70951e-05
ENSG00000149451	0.00380814	-8.0367	4.75874e-05
ENSG00000152208	0.00806518	-6.95408	4.96908e-05
ENSG00000088305	0.0526044	-4.24867	5.1587e-05
ENSG00000096433	0.043853	-4.51118	5.23432e-05
ENSG00000177469	0.029893	-5.06405	5.62338e-05
ENSG00000106078	0.0248194	-5.33239	5.66134e-05
ENSG00000134817	0.00390969	-7.99873	5.7643e-05
ENSG00000204252	0.0181153	-5.78664	6.159e-05
ENSG00000159251	0.0261217	-5.2586	6.23972e-05
ENSG00000166073	0.021992	-5.50688	6.38748e-05
ENSG00000121310	0.022015	-5.50537	6.42934e-05
ENSG00000124507	0.0121057	-6.36817	7.27101e-05
ENSG00000153093	0.00774481	-7.01256	7.83192e-05
ENSG00000105131	0.00983854	-6.66734	8.01685e-05
ENSG00000105357	0.0411335	-4.60354	8.17807e-05
ENSG00000125798	0.015433	-6.01784	8.94919e-05
ENSG00000164379	0.0175423	-5.83302	0.00010167
ENSG00000076716	0.0540652	-4.20916	0.000106023
ENSG00000170421	0.06086	-4.03836	0.000108161
ENSG00000110799	0.0218347	-5.51723	0.00011508
ENSG00000102230	0.00722234	-7.11332	0.000116968
ENSG00000127824	0.0226666	-5.46329	0.000117369
ENSG00000159753	0.0377929	-4.72574	0.000122521
ENSG00000158874	0.018835	-5.73044	0.000123988
ENSG00000134954	0.0198331	-5.65595	0.000126462
ENSG00000111057	0.0626817	-3.99581	0.000129881
ENSG00000142173	0.0600827	-4.05691	0.000130719
ENSG00000120318	0.0491043	-4.34801	0.000131494
ENSG00000149418	0.0247894	-5.33413	0.000133903
ENSG00000126803	0.0132782	-6.2348	0.000134214
ENSG00000084636	0.0226139	-5.46665	0.000135381
ENSG00000248746	0.0395342	-4.66076	0.000135552
ENSG00000116661	0.0273213	-5.19383	0.000142372
ENSG00000174640	0.0291949	-5.09814	0.000142648
ENSG00000134207	0.0376737	-4.7303	0.00014782
ENSG00000164488	0.0201388	-5.63388	0.000149727
ENSG00000173673	0.0262893	-5.24938	0.000150195
ENSG00000170608	0.0175936	-5.8288	0.000151059
ENSG00000184344	0.00516953	-7.59575	0.000154419
ENSG00000171126	0.0243434	-5.36033	0.000156934
ENSG00000059804	0.0640321	-3.96506	0.000157522
ENSG00000166888	0.0499322	-4.32389	0.000157636
ENSG00000164265	0.00379173	-8.04293	0.000158011
ENSG00000132698	0.0253069	-5.30433	0.000158423
ENSG00000164591	0.00860324	-6.8609	0.000159988
ENSG00000165863	0.00583675	-7.42062	0.000160581
ENSG00000132297	0.00118715	-9.71828	0.000164126
ENSG00000143768	0.0585344	-4.09457	0.000174905
ENSG00000132622	0.00977423	-6.6768	0.00018394
ENSG00000142632	0.0477945	-4.38701	0.000184859
ENSG00000008323	0.0254006	-5.299	0.000184995
ENSG00000103490	0.009821	-6.66991	0.000189784
ENSG00000144645	0.0322227	-4.95578	0.000192277
ENSG00000112297	0.0140468	-6.15361	0.000193038
ENSG00000188522	0.0534475	-4.22573	0.000215442
ENSG00000174292	0.0119055	-6.39223	0.000220693
ENSG00000162069	0.00968319	-6.6903	0.000241224
ENSG00000149591	0.065535	-3.93159	0.000247313
ENSG00000125845	0.0458086	-4.44824	0.000255663
ENSG00000163814	0.0155696	-6.00513	0.000268917
ENSG00000175707	0.00824443	-6.92236	0.000281448
ENSG00000117834	0.0109504	-6.51287	0.000282714
ENSG00000137486	0.0616098	-4.0207	0.000285101
ENSG00000185585	0.0271857	-5.20101	0.000290249
ENSG00000198915	0.0243105	-5.36227	0.000295981
ENSG00000167772	0.0152106	-6.03878	0.000318554
ENSG00000188643	0.0417925	-4.58061	0.000322029
ENSG00000024422	0.0233882	-5.41808	0.00032382
ENSG00000180730	0.0343339	-4.86422	0.000329078
ENSG00000065717	0.0122078	-6.35605	0.000329385
ENSG00000204711	0.00132283	-9.56216	0.00033732
ENSG00000131771	0.00848294	-6.88122	0.000337777
ENSG00000130208	0.0355884	-4.81245	0.000339805
ENSG00000089250	0.0176998	-5.82012	0.000342927
ENSG00000102349	0.0201537	-5.63281	0.000349916
ENSG00000146700	0.0398046	-4.65092	0.000351843
ENSG00000128567	0.0805083	-3.63472	0.000356325
ENSG00000184307	0.00589072	-7.40734	0.00036518
ENSG00000089820	0.0466515	-4.42193	0.000379716
ENSG00000115414	0.0818823	-3.6103	0.000384042
ENSG00000182472	0.0130216	-6.26295	0.000388112
ENSG00000103044	0.050817	-4.29854	0.000398531
ENSG00000008083	0.0786831	-3.6678	0.000401615
ENSG00000204936	0.0052802	-7.56519	0.000442434
ENSG00000198113	0.039075	-4.67761	0.00046977
ENSG00000157227	0.0771948	-3.69535	0.00054889
ENSG00000184363	0.0206698	-5.59633	0.000549715
ENSG00000170382	0.029647	-5.07597	0.000551356
ENSG00000135926	0.0292128	-5.09726	0.000558329
ENSG00000111679	0.0359606	-4.79744	0.00056072
ENSG00000204175	0.0215139	-5.53858	0.000568149
ENSG00000130545	0.0112116	-6.47886	0.000602584
ENSG00000187140	0.0112336	-6.47603	0.000609754
ENSG00000138083	0	-Inf	0.000625076
ENSG00000145113	0.0106952	-6.54689	0.000635734
ENSG00000062038	0.0789784	-3.6624	0.000636431
ENSG00000159167	0.0635435	-3.97611	0.000643273
ENSG00000164692	0.074072	-3.75493	0.000657258
ENSG00000139629	0.0186725	-5.74294	0.000697562
ENSG00000177096	0.0126877	-6.30042	0.000699059
ENSG00000125730	0.00654038	-7.25641	0.00069942
ENSG00000184261	0.0480372	-4.3797	0.000721302
ENSG00000112379	0.0706363	-3.82345	0.00074149
ENSG00000143632	0.0379454	-4.71993	0.000753775
ENSG00000198624	0.00966682	-6.69274	0.00075467
ENSG00000255192	0.0122787	-6.3477	0.000762605
ENSG00000170961	0.0388389	-4.68635	0.000765614
ENSG00000110719	0.0414451	-4.59266	0.00077059
ENSG00000006047	0.0482017	-4.37477	0.000776202
ENSG00000165731	0.0311837	-5.00307	0.000805927
ENSG00000141524	0.0730102	-3.77576	0.000807234
ENSG00000167105	0.0233823	-5.41844	0.000834873
ENSG00000174469	0.0839807	-3.5738	0.00086274
ENSG00000128274	0.0169912	-5.87907	0.000863576
ENSG00000149090	0.0228065	-5.45441	0.000876134
ENSG00000166394	0.037775	-4.72642	0.000879424
ENSG00000167642	0.0886977	-3.49496	0.000903404
ENSG00000135750	0.00774562	-7.0124	0.00095761
ENSG00000070886	0.00401681	-7.95973	0.000987492
ENSG00000197993	0.0338728	-4.88373	0.00101031
ENSG00000101282	0.0129501	-6.27089	0.00103951
ENSG00000117602	0.0387564	-4.68942	0.00104165
ENSG00000197444	0.0612124	-4.03003	0.00106495
ENSG00000089327	0.070687	-3.82241	0.00107235
ENSG00000167306	0.0480739	-4.3786	0.00107729
ENSG00000164976	0.0553146	-4.1762	0.00109635
ENSG00000113196	0.00706571	-7.14495	0.0011043
ENSG00000164007	0.0300548	-5.05626	0.00112233
ENSG00000127152	0.0111096	-6.49204	0.00114077
ENSG00000005884	0.064983	-3.94379	0.00114667
ENSG00000157399	0.0267923	-5.22204	0.00117272
ENSG00000162433	0.0645179	-3.95416	0.00118922
ENSG00000006327	0.064307	-3.95888	0.00123901
ENSG00000169692	0.0384374	-4.70135	0.00125405
ENSG00000162542	0.0105604	-6.56519	0.00126134
ENSG00000172830	0.0587618	-4.08898	0.00126639
ENSG00000106789	0.0790673	-3.66078	0.00128315
ENSG00000101210	0.0503927	-4.31064	0.00128588
ENSG00000180921	0.0910743	-3.45681	0.00130627
ENSG00000114923	0.0431609	-4.53413	0.00134369
ENSG00000197747	0.0321906	-4.95722	0.00137216
ENSG00000171587	0.0315037	-4.98833	0.00144714
ENSG00000092421	0.107234	-3.22117	0.00149886
ENSG00000167779	0.051612	-4.27615	0.00150186
ENSG00000111331	0.00544694	-7.52034	0.00150786
ENSG00000205978	0.0871413	-3.5205	0.00155164
ENSG00000103335	0.089443	-3.48289	0.00155687
ENSG00000179832	0.0833216	-3.58517	0.00160235
ENSG00000180347	0	-Inf	0.00162498
ENSG00000187867	0.050658	-4.30306	0.00162565
ENSG00000107485	0.0277721	-5.17022	0.00166446
ENSG00000143248	0.0161322	-5.95391	0.00168802
ENSG00000156925	0.0890074	-3.48993	0.00170243
ENSG00000109854	0.0438395	-4.51162	0.0017149
ENSG00000150510	0.0641184	-3.96312	0.00175259
ENSG00000072818	0.030172	-5.05065	0.00178771
ENSG00000017483	0.050508	-4.30734	0.00179328
ENSG00000135525	0.0865615	-3.53013	0.00179739
ENSG00000043355	0.105793	-3.24068	0.00183457
ENSG00000076944	0.054641	-4.19387	0.00184808
ENSG00000048545	0.0280291	-5.15693	0.00189332
ENSG00000075673	0	-Inf	0.00190915
ENSG00000110090	0.0690921	-3.85533	0.00191026
ENSG00000139800	0.0748614	-3.73963	0.0019475
ENSG00000141526	0.0695223	-3.84638	0.00199597
ENSG00000079337	0.0498441	-4.32643	0.00201582
ENSG00000089116	0.0350122	-4.836	0.00202461
ENSG00000120937	0.0617802	-4.01671	0.00203693
ENSG00000166250	0.0693259	-3.85046	0.00211522
ENSG00000165215	0.0248815	-5.32878	0.00211596
ENSG00000089847	0.0524084	-4.25406	0.00211731
ENSG00000061337	0.0738048	-3.76014	0.00212118
ENSG00000117266	0.0927487	-3.43053	0.00212208
ENSG00000112343	0.0194047	-5.68745	0.00213066
ENSG00000170955	0.0291285	-5.10142	0.00213926
ENSG00000163520	0.110075	-3.18344	0.00215932
ENSG00000213214	0.00989796	-6.65865	0.00216951
ENSG00000226792	0.00896327	-6.80176	0.00217312
ENSG00000151952	0.0730587	-3.7748	0.00219452
ENSG00000122359	0.0896982	-3.47878	0.00223622
ENSG00000179178	0.0127658	-6.29157	0.00244786
ENSG00000019505	0.019928	-5.64906	0.00245037
ENSG00000253304	0.035636	-4.81052	0.00246091
ENSG00000273706	0.0798603	-3.64638	0.0024642
ENSG00000141655	0.0111196	-6.49076	0.00254082
ENSG00000152939	0.0335916	-4.89575	0.00256611
ENSG00000133106	0.0208097	-5.5866	0.00261679
ENSG00000124313	0.0683182	-3.87159	0.00265412
ENSG00000119411	0.00829888	-6.91287	0.0026808
ENSG00000134463	0.0452407	-4.46623	0.0027092
ENSG00000146215	0.0245574	-5.3477	0.0027539
ENSG00000189430	0.0198126	-5.65744	0.00281122
ENSG00000140835	0.00611952	-7.35237	0.00283162
ENSG00000084674	0.00942996	-6.72853	0.0028419
ENSG00000156049	0.0122689	-6.34885	0.00284644
ENSG00000124143	0.016412	-5.92911	0.00291037
ENSG00000138100	0	-Inf	0.00293414
ENSG00000189431	0.0344973	-4.85737	0.00293434
ENSG00000108821	0.115108	-3.11894	0.0029497
ENSG00000130307	0.0256906	-5.28262	0.00309365
ENSG00000103710	0.0475197	-4.39533	0.00314613
ENSG00000132849	0.0758401	-3.7209	0.0032622
ENSG00000173156	0.0210882	-5.56742	0.00327556
ENSG00000160867	0.104498	-3.25846	0.00330805
ENSG00000142102	0.120829	-3.04896	0.00335217
ENSG00000182511	0.0484546	-4.36722	0.0034582
ENSG00000121570	0.126068	-2.98773	0.00347235
ENSG00000169213	0.115866	-3.10947	0.00356806
ENSG00000185436	0.0384016	-4.70269	0.0035708
ENSG00000196218	0.115258	-3.11706	0.00359455
ENSG00000132205	0.0374176	-4.74014	0.00368858
ENSG00000124493	0.109106	-3.1962	0.00376074
ENSG00000101443	0.0645597	-3.95322	0.00379555
ENSG00000124570	0.0718107	-3.79966	0.00383994
ENSG00000156687	0.0927984	-3.42976	0.00384933
ENSG00000166387	0.0912152	-3.45458	0.00385347
ENSG00000147601	0.128426	-2.96099	0.00385851
ENSG00000087510	0.0262872	-5.2495	0.00387447
ENSG00000079739	0.123586	-3.01641	0.00390648
ENSG00000266714	0.10783	-3.21317	0.00400141
ENSG00000117595	0.0182791	-5.77366	0.00400573
ENSG00000067057	0.126837	-2.97896	0.00406628
ENSG00000185274	0.129144	-2.95295	0.00407786
ENSG00000115648	0.00205054	-8.92978	0.00408831
ENSG00000204612	0.00373538	-8.06453	0.00409456
ENSG00000204264	0.0301808	-5.05023	0.00419927
ENSG00000137801	0.104165	-3.26305	0.00420867
ENSG00000173040	0.0558007	-4.16357	0.00425614
ENSG00000158270	0.0907865	-3.46138	0.00430525
ENSG00000169894	0.0513944	-4.28224	0.00432424
ENSG00000181481	0.0320356	-4.96418	0.00436088
ENSG00000274286	0.0316053	-4.98369	0.0044285
ENSG00000172935	0	-Inf	0.0045056
ENSG00000169026	0.0180017	-5.79573	0.00462086
ENSG00000100341	0.00924358	-6.75733	0.00462764
ENSG00000174951	0.0360391	-4.79429	0.00465873
ENSG00000102096	0.12163	-3.03943	0.0046828
ENSG00000129667	0.0788603	-3.66456	0.00470121
ENSG00000143674	0.0742535	-3.7514	0.0047104
ENSG00000101098	0.10111	-3.306	0.00473773
ENSG00000124942	0.142258	-2.81342	0.00481988
ENSG00000105699	0.134077	-2.89886	0.00515513
ENSG00000135111	0.0358357	-4.80246	0.00516918
ENSG00000064763	0.0298687	-5.06522	0.00526072
ENSG00000176485	0.107936	-3.21175	0.0052825
ENSG00000106038	0	-Inf	0.00535259
ENSG00000107562	0.0846465	-3.56241	0.005383
ENSG00000102996	0.140523	-2.83112	0.00556957
ENSG00000178038	0.0483264	-4.37104	0.00557729
ENSG00000135749	0.132165	-2.91959	0.00564767
ENSG00000237172	0.0608441	-4.03874	0.00569789
ENSG00000125850	0.0119888	-6.38216	0.00571141
ENSG00000139874	0.0141201	-6.14611	0.00571397
ENSG00000235750	0.0141201	-6.14611	0.00571397
ENSG00000130762	0.113816	-3.13522	0.00576074
ENSG00000263528	0.0524093	-4.25403	0.00581047
ENSG00000165795	0.0630715	-3.98687	0.00583879
ENSG00000215045	0.0367994	-4.76417	0.00585104
ENSG00000111077	0.0511839	-4.28817	0.00591217
ENSG00000158859	0.0282755	-5.14431	0.00613315
ENSG00000168938	0.0289437	-5.11061	0.00613639
ENSG00000159314	0.0773835	-3.69183	0.00623034
ENSG00000163492	0.0263575	-5.24564	0.00630266
ENSG00000067606	0.116619	-3.10012	0.00630548
ENSG00000125844	0.151997	-2.71789	0.00638501
ENSG00000110455	0.0508196	-4.29847	0.00653909
ENSG00000170439	0	-Inf	0.00663402
ENSG00000068831	0.0505395	-4.30644	0.00683792
ENSG00000184012	0.0482332	-4.37383	0.00693463
ENSG00000056972	0.0562781	-4.15128	0.00693588
ENSG00000164619	0.0408547	-4.61335	0.00696248
ENSG00000165912	0.126432	-2.98357	0.00696279
ENSG00000125731	0.0304788	-5.03605	0.00702206
ENSG00000166535	0.00585154	-7.41697	0.00704122
ENSG00000253368	0.0460017	-4.44217	0.00720667
ENSG00000181392	0.0524313	-4.25343	0.00727219
ENSG00000187634	0.0308847	-5.01696	0.0074556
ENSG00000079691	0.109554	-3.19028	0.00757224
ENSG00000182718	0.115554	-3.11336	0.00759475
ENSG00000152969	0.0408943	-4.61196	0.00784258
ENSG00000100146	0.0237414	-5.39645	0.00792482
ENSG00000138639	0.0285611	-5.12981	0.00804796
ENSG00000134333	0.130514	-2.93772	0.00815331
ENSG00000183569	0.0504929	-4.30778	0.00817718
ENSG00000145794	0.0880544	-3.50546	0.00823589
ENSG00000166482	0.0832639	-3.58616	0.00831072
ENSG00000115112	0.00910643	-6.7789	0.00831661
ENSG00000106991	0.0141884	-6.13914	0.00831875
ENSG00000133937	0.0569629	-4.13383	0.00842895
ENSG00000171794	0.0185949	-5.74895	0.00855271
ENSG00000117407	0.0397651	-4.65235	0.00885383
ENSG00000181019	0.0697572	-3.84151	0.00926546
ENSG00000181274	0.11852	-3.0768	0.00926619
ENSG00000135253	0.100407	-3.31608	0.00926917
ENSG00000137331	0.127421	-2.97232	0.00928895
ENSG00000130720	0.0133538	-6.22661	0.00934309
ENSG00000185215	0.105062	-3.25068	0.00936269
ENSG00000130813	0.060321	-4.0512	0.00939741
ENSG00000124145	0.143565	-2.80022	0.00941219
ENSG00000197971	0.059039	-4.08219	0.00956159
ENSG00000213626	0.134999	-2.88898	0.00956259
ENSG00000162105	0.149047	-2.74616	0.00963716
ENSG00000171219	0.112499	-3.15201	0.00983642
ENSG00000164093	0.054529	-4.19683	0.00987962
ENSG00000007402	0.15176	-2.72014	0.0098834
ENSG00000163286	0.00248497	-8.65255	0.00990522
ENSG00000179627	0.0431686	-4.53387	0.00993697
ENSG00000171608	0.107287	-3.22046	0.0100732
ENSG00000086967	0.0109504	-6.51287	0.0101029
ENSG00000196155	0.106335	-3.23331	0.0101272
ENSG00000162998	0.0963092	-3.37618	0.0102947
ENSG00000099337	0.0901745	-3.47114	0.010471
ENSG00000058085	0.0574903	-4.12054	0.0105062
ENSG00000014216	0.171027	-2.54771	0.0105731
ENSG00000009950	0.0639115	-3.96778	0.0105835
ENSG00000154760	0.0149946	-6.05942	0.0106013
ENSG00000168398	0.0137989	-6.1793	0.0107722
ENSG00000140859	0.108789	-3.20039	0.0108663
ENSG00000136943	0.126473	-2.98309	0.010884
ENSG00000143375	0.156397	-2.67671	0.0109662
ENSG00000226887	0.0125926	-6.31128	0.0111557
ENSG00000189334	0.0564324	-4.14733	0.0114232
ENSG00000116329	0.0616779	-4.0191	0.0115035
ENSG00000197355	0.0846485	-3.56237	0.0115984
ENSG00000184408	0.0760839	-3.71626	0.0116346
ENSG00000113356	0.0880208	-3.50601	0.0116435
ENSG00000156959	0.121921	-3.03599	0.0121508
ENSG00000165816	0.00663076	-7.23661	0.0121757
ENSG00000109625	0.00997371	-6.64765	0.0123296
ENSG00000160691	0.177278	-2.49591	0.0126171
ENSG00000168016	0.121606	-3.03972	0.0129483
ENSG00000101000	0.0182231	-5.77808	0.0130655
ENSG00000173193	0.115174	-3.11811	0.0130934
ENSG00000196189	0.0922631	-3.4381	0.0131362
ENSG00000115107	0.127499	-2.97145	0.0132136
ENSG00000158220	0.0503228	-4.31264	0.0132688
ENSG00000188191	0.136772	-2.87016	0.0135092
ENSG00000148677	0.0833705	-3.58432	0.0135348
ENSG00000132749	0.117437	-3.09005	0.0135659
ENSG00000135480	0.0564933	-4.14578	0.0136529
ENSG00000104881	0.124787	-3.00246	0.013801
ENSG00000141682	0.139411	-2.84258	0.013829
ENSG00000116132	0	-Inf	0.0139941
ENSG00000145681	0.0197312	-5.66338	0.0140344
ENSG00000136059	0.0769721	-3.69952	0.0141914
ENSG00000158710	0.158018	-2.66184	0.0142656
ENSG00000146530	0.0425833	-4.55357	0.0143523
ENSG00000140511	0.123197	-3.02096	0.0144081
ENSG00000162882	0.0149098	-6.06759	0.0148759
ENSG00000162390	0.0661599	-3.9179	0.0149222
ENSG00000111752	0.193065	-2.37284	0.0150109
ENSG00000144115	0.0176289	-5.82592	0.0151139
ENSG00000187678	0.178178	-2.48861	0.0151154
ENSG00000008283	0.11084	-3.17345	0.0151865
ENSG00000085831	0.0340353	-4.87683	0.0152138
ENSG00000197943	0.0957137	-3.38513	0.0153655
ENSG00000104953	0.00277502	-8.49329	0.0156034
ENSG00000198336	0.0121615	-6.36154	0.0156456
ENSG00000188257	0	-Inf	0.0156769
ENSG00000139832	0.0436395	-4.51822	0.0158402
ENSG00000076662	0.10194	-3.29421	0.0159195
ENSG00000076826	0.16513	-2.59833	0.0159219
ENSG00000257017	0.00507021	-7.62374	0.0159349
ENSG00000142405	0.053858	-4.2147	0.0159905
ENSG00000114854	0.0521671	-4.26072	0.0160571
ENSG00000162949	0.0238611	-5.38919	0.0160622
ENSG00000142449	0.191844	-2.38199	0.0162764
ENSG00000173890	0.0050996	-7.6154	0.0163029
ENSG00000164318	0.0281854	-5.14891	0.0163824
ENSG00000114993	0.170405	-2.55296	0.0164572
ENSG00000183873	0.124868	-3.00153	0.0164705
ENSG00000050767	0.130438	-2.93857	0.0166831
ENSG00000165929	0.00282856	-8.46572	0.0168157
ENSG00000160602	0.116511	-3.10146	0.0168167
ENSG00000175766	0.00283768	-8.46107	0.0170272
ENSG00000159374	0	-Inf	0.017576
ENSG00000175832	0.179529	-2.47771	0.0175908
ENSG00000185483	0.158624	-2.65632	0.0177761
ENSG00000265763	0.0156041	-6.00193	0.0178294
ENSG00000137266	0.162241	-2.62379	0.0179186
ENSG00000196569	0.0627674	-3.99384	0.018135
ENSG00000065621	0.063036	-3.98768	0.0184379
ENSG00000181284	0.0665607	-3.90918	0.0184682
ENSG00000221955	0.0746593	-3.74353	0.0185181
ENSG00000128833	0.119573	-3.06404	0.0185879
ENSG00000022556	0.183085	-2.44942	0.0186481
ENSG00000063180	0.173523	-2.5268	0.0187239
ENSG00000142549	0.172424	-2.53597	0.0188639
ENSG00000211445	0.111969	-3.15883	0.0189214
ENSG00000108798	0.00292253	-8.41857	0.0190625
ENSG00000185442	0.125312	-2.99641	0.0191085
ENSG00000115085	0.0323628	-4.94952	0.0191875
ENSG00000147394	0.118525	-3.07673	0.0192594
ENSG00000105737	0.183252	-2.4481	0.0193302
ENSG00000142619	0.0128421	-6.28298	0.0193717
ENSG00000157992	0.0990329	-3.33595	0.019581
ENSG00000113749	0.0414577	-4.59222	0.0196499
ENSG00000160223	0.0845562	-3.56395	0.0198366
ENSG00000104332	0.207025	-2.27212	0.0198828
ENSG00000169851	0.157411	-2.66739	0.019888
ENSG00000002834	0.204472	-2.29003	0.0200835
ENSG00000154237	0.0572323	-4.12703	0.0202603
ENSG00000093010	0.0541512	-4.20686	0.0203303
ENSG00000149150	0.107716	-3.2147	0.0205081
ENSG00000123405	0.00541342	-7.52924	0.0205168
ENSG00000166736	0.00541342	-7.52924	0.0205168
ENSG00000125144	0.0563342	-4.14984	0.0207211
ENSG00000198467	0.201766	-2.30924	0.0207301
ENSG00000107099	0.0655902	-3.93037	0.0208122
ENSG00000177706	0.183999	-2.44223	0.0211311
ENSG00000101160	0.152825	-2.71005	0.0212241
ENSG00000130477	0.1928	-2.37482	0.0212499
ENSG00000168671	0.0585744	-4.09359	0.021259
ENSG00000184743	0.0992461	-3.33285	0.0214754
ENSG00000140545	0.212475	-2.23463	0.0216091
ENSG00000171680	0.184106	-2.44139	0.0217222
ENSG00000180739	0.0383087	-4.70618	0.0219317
ENSG00000121898	0.0164811	-5.92304	0.0219816
ENSG00000123213	0.179648	-2.47675	0.0223249
ENSG00000105088	0.186553	-2.42235	0.0223467
ENSG00000197406	0.174855	-2.51577	0.0223521
ENSG00000186838	0.0575389	-4.11932	0.0224414
ENSG00000125966	0.156798	-2.67302	0.0227315
ENSG00000155269	0.0396636	-4.65604	0.0228906
ENSG00000132031	0.10025	-3.31832	0.0230393
ENSG00000188162	0.0432408	-4.53146	0.0230417
ENSG00000171227	0.0297078	-5.07301	0.0230871
ENSG00000158156	0.136007	-2.87824	0.0233959
ENSG00000074317	0.0225078	-5.47343	0.0234441
ENSG00000135074	0.203266	-2.29856	0.0235527
ENSG00000155846	0.170541	-2.55181	0.0235545
ENSG00000003402	0.158891	-2.65389	0.0236275
ENSG00000133124	0.0908449	-3.46045	0.0236803
ENSG00000134363	0.145951	-2.77644	0.0237095
ENSG00000091490	0.106245	-3.23454	0.0240313
ENSG00000176101	0.167403	-2.5786	0.0241019
ENSG00000165644	0.095649	-3.38611	0.0242759
ENSG00000213654	0.0540787	-4.20879	0.0244072
ENSG00000135248	0.00567536	-7.46107	0.0244244
ENSG00000166831	0.200182	-2.32062	0.0244424
ENSG00000140564	0.203165	-2.29928	0.0244532
ENSG00000215845	0.111016	-3.17116	0.0245129
ENSG00000185201	0.193263	-2.37136	0.0246774
ENSG00000123104	0.135705	-2.88146	0.0246931
ENSG00000187210	0.102178	-3.29084	0.0247193
ENSG00000141506	0.0890816	-3.48873	0.0248962
ENSG00000125462	0.0777265	-3.68545	0.0251256
ENSG00000161940	0.0684537	-3.86873	0.0251539
ENSG00000105289	0.151452	-2.72307	0.0251907
ENSG00000153406	0.186594	-2.42203	0.0257866
ENSG00000162817	0.0930059	-3.42653	0.0258156
ENSG00000185432	0.102224	-3.2902	0.0258707
ENSG00000175538	0.0101404	-6.62374	0.0259247
ENSG00000143494	0.205527	-2.2826	0.0260626
ENSG00000166206	0.195549	-2.35439	0.026525
ENSG00000051523	0.1947	-2.36068	0.0266062
ENSG00000123989	0.196958	-2.34404	0.0266775
ENSG00000178573	0.057684	-4.11569	0.0268803
ENSG00000176387	0.157986	-2.66213	0.0269838
ENSG00000160801	0.0344009	-4.86141	0.0270314
ENSG00000185527	0.0122178	-6.35487	0.0270551
ENSG00000163032	0.0460785	-4.43976	0.0271
ENSG00000283567	0.00322227	-8.2777	0.0272098
ENSG00000184254	0.0425889	-4.55338	0.0273632
ENSG00000021355	0.0718526	-3.79882	0.0274933
ENSG00000135636	0.177616	-2.49316	0.0274958
ENSG00000179761	0.089243	-3.48612	0.0281043
ENSG00000179855	0.0160359	-5.96256	0.0285862
ENSG00000147862	0.0193573	-5.69098	0.0287878
ENSG00000261150	0.210462	-2.24837	0.028929
ENSG00000142910	0.0788952	-3.66392	0.0297296
ENSG00000168071	0.185542	-2.43018	0.0298098
ENSG00000175984	0.00600465	-7.3797	0.0298188
ENSG00000104611	0.0179527	-5.79966	0.029964
ENSG00000157510	0.0376072	-4.73285	0.0299653
ENSG00000158813	0.167954	-2.57387	0.030132
ENSG00000171017	0.0398406	-4.64962	0.0303044
ENSG00000153443	0.15974	-2.6462	0.0306009
ENSG00000053524	0.16116	-2.63343	0.0306319
ENSG00000095383	0.139444	-2.84225	0.0307887
ENSG00000144843	0.0228219	-5.45344	0.0308015
ENSG00000103316	0.0602349	-4.05326	0.0313465
ENSG00000146858	0.0323809	-4.94871	0.0314739
ENSG00000133636	0	-Inf	0.0315071
ENSG00000185156	0.0061089	-7.35487	0.0316338
ENSG00000173227	0.126096	-2.98741	0.0317139
ENSG00000178568	0.107533	-3.21715	0.0320451
ENSG00000139998	0.200349	-2.31942	0.0322522
ENSG00000140416	0.234963	-2.0895	0.032292
ENSG00000183421	0.0678477	-3.88156	0.0324611
ENSG00000092929	0.0665705	-3.90897	0.0325633
ENSG00000135723	0.209386	-2.25576	0.0325813
ENSG00000127564	0.209392	-2.25572	0.0327925
ENSG00000100292	0.14288	-2.80713	0.03282
ENSG00000124588	0.175191	-2.513	0.032831
ENSG00000126010	0.0327831	-4.9309	0.032847
ENSG00000125753	0.224159	-2.1574	0.0329315
ENSG00000089472	0.212227	-2.23632	0.0332478
ENSG00000111321	0.0377988	-4.72552	0.033763
ENSG00000100097	0.117245	-3.09241	0.0338801
ENSG00000074410	0.025074	-5.31766	0.0343886
ENSG00000126218	0.0864938	-3.53126	0.0344449
ENSG00000104369	0.162476	-2.6217	0.0344713
ENSG00000197774	0.21492	-2.21813	0.0345509
ENSG00000129521	0.149017	-2.74645	0.0346305
ENSG00000172819	0.200227	-2.32029	0.0347799
ENSG00000171435	0.104685	-3.25587	0.0347864
ENSG00000159214	0.118177	-3.08098	0.0348207
ENSG00000152804	0.0307985	-5.021	0.0349258
ENSG00000131389	0.239077	-2.06445	0.0353673
ENSG00000137819	0.020564	-5.60374	0.0354632
ENSG00000157978	0.18102	-2.46578	0.0357068
ENSG00000111145	0.13761	-2.86134	0.0357401
ENSG00000169418	0.118473	-3.07737	0.0357459
ENSG00000136068	0.24807	-2.01118	0.035766
ENSG00000078725	0.156226	-2.67829	0.0361827
ENSG00000198844	0.0283768	-5.13914	0.0361996
ENSG00000152661	0.233181	-2.10048	0.0362363
ENSG00000173218	0.184459	-2.43863	0.0362886
ENSG00000046604	0.219685	-2.18649	0.0364973
ENSG00000188677	0.150008	-2.73689	0.0365442
ENSG00000036672	0.104724	-3.25534	0.0366346
ENSG00000011201	0.2106	-2.24742	0.0370596
ENSG00000139044	0.221903	-2.172	0.0371294
ENSG00000159228	0.142948	-2.80644	0.0371686
ENSG00000213889	0.0495595	-4.33469	0.0373198
ENSG00000164300	0.232972	-2.10177	0.0373424
ENSG00000110057	0.157596	-2.6657	0.0375287
ENSG00000006611	0.0209448	-5.57727	0.0377035
ENSG00000156711	0.154126	-2.69782	0.0377591
ENSG00000067840	0.235725	-2.08482	0.0379662
ENSG00000175513	0.10102	-3.30728	0.038174
ENSG00000277196	0.12273	-3.02644	0.0382932
ENSG00000108375	0.0461256	-4.43829	0.0389343
ENSG00000166825	0.0290461	-5.10551	0.0391175
ENSG00000189129	0.0136174	-6.19841	0.0391837
ENSG00000113763	0.12753	-2.97109	0.0393333
ENSG00000101347	0.195333	-2.35599	0.0394468
ENSG00000160796	0.241732	-2.04852	0.0395999
ENSG00000170412	0.160577	-2.63867	0.0396202
ENSG00000187391	0.196328	-2.34866	0.0397652
ENSG00000023171	0.208362	-2.26283	0.0399738
ENSG00000095066	0.224331	-2.1563	0.0400265
ENSG00000172889	0.179967	-2.47419	0.0401717
ENSG00000161958	0.0563708	-4.14891	0.0402215
ENSG00000115339	0.0466497	-4.42199	0.0404132
ENSG00000019582	0.113717	-3.13648	0.0405271
ENSG00000125170	0.212075	-2.23735	0.0408298
ENSG00000204516	0.115958	-3.10833	0.0410228
ENSG00000117877	0.207165	-2.27115	0.041893
ENSG00000106785	0.163585	-2.61189	0.0419173
ENSG00000065054	0.146517	-2.77086	0.0420035
ENSG00000026508	0.0116901	-6.41857	0.0420135
ENSG00000174059	0.0250686	-5.31797	0.0421996
ENSG00000137841	0.125563	-2.99351	0.0423826
ENSG00000155367	0.0769721	-3.69952	0.0424817
ENSG00000164292	0.222739	-2.16658	0.0425445
ENSG00000142089	0.249925	-2.00044	0.0427886
ENSG00000101695	0.104148	-3.26329	0.0428627
ENSG00000239697	0.00369614	-8.07977	0.042866
ENSG00000185070	0.102377	-3.28804	0.0429403
ENSG00000167702	0.20083	-2.31595	0.0432154
ENSG00000112159	0.260833	-1.9388	0.0432273
ENSG00000166816	0.0936938	-3.4159	0.0433243
ENSG00000135740	0.159848	-2.64523	0.043954
ENSG00000160471	0.0371421	-4.7508	0.0440454
ENSG00000178764	0.22355	-2.16133	0.0440576
ENSG00000140682	0.065836	-3.92498	0.0440611
ENSG00000103489	0.223511	-2.16158	0.0440674
ENSG00000076555	0.217116	-2.20346	0.0444232
ENSG00000116771	0.0331955	-4.91287	0.0446847
ENSG00000154914	0.125007	-2.99992	0.0447242
ENSG00000259803	0.0346171	-4.85237	0.0447469
ENSG00000099814	0.246536	-2.02013	0.0448734
ENSG00000166869	0	-Inf	0.045157
ENSG00000149201	0.12794	-2.96646	0.0454559
ENSG00000131037	0.194972	-2.35866	0.0454583
ENSG00000162458	0.233758	-2.09691	0.0454926
ENSG00000042286	0.134237	-2.89715	0.0459451
ENSG00000183145	0.00956175	-6.70851	0.0459725
ENSG00000171812	0.029025	-5.10656	0.0461365
ENSG00000100033	0.207032	-2.27207	0.046156
ENSG00000197467	0.19342	-2.37019	0.0462091
ENSG00000140600	0.00380814	-8.0367	0.047005
ENSG00000167103	0.104817	-3.25405	0.0470482
ENSG00000130830	0.0886589	-3.49559	0.0471554
ENSG00000134668	0.0307888	-5.02145	0.0471775
ENSG00000148926	0.228365	-2.13059	0.0473915
ENSG00000197261	0.0243006	-5.36287	0.0475275
ENSG00000169764	0.211209	-2.24326	0.0476378
ENSG00000120279	0	-Inf	0.0479831
ENSG00000124212	0.23456	-2.09197	0.0479836
ENSG00000203326	0.114897	-3.12159	0.0479845
ENSG00000170545	0.0667745	-3.90456	0.0480029
ENSG00000167553	0.266882	-1.90572	0.0482255
ENSG00000004399	0.247068	-2.01702	0.0483604
ENSG00000204634	0.193127	-2.37237	0.0484768
ENSG00000145247	0.141439	-2.82175	0.0485699
ENSG00000132359	0.250929	-1.99465	0.0486145
ENSG00000170801	0.0920596	-3.44129	0.0488193
ENSG00000164176	0.138102	-2.85619	0.0489819
ENSG00000109861	0.243127	-2.04022	0.0492446
ENSG00000176532	0.0356911	-4.80829	0.049263

## Sheet: D18 vs D0 up
id	foldChange	log2FoldChange	pval
ENSG00000205922	16820.7	14.038	0.0182015
ENSG00000119614	8741.45	13.0937	0.0246636
ENSG00000138136	Inf	Inf	0.0265516
ENSG00000187714	Inf	Inf	0.0280176
ENSG00000105997	3321.82	11.6978	0.0321091
ENSG00000120251	Inf	Inf	0.0325947
ENSG00000174521	Inf	Inf	0.0351773
ENSG00000149972	3892.36	11.9264	0.0360014
ENSG00000044524	3835.64	11.9053	0.0362508
ENSG00000147488	2873.45	11.4886	0.0368761
ENSG00000106006	2486.91	11.2801	0.0376501
ENSG00000153253	Inf	Inf	0.0377281
ENSG00000064218	Inf	Inf	0.0386726
ENSG00000152784	1978.06	10.9499	0.0390519
ENSG00000217236	3228	11.6564	0.0393185
ENSG00000134121	2167.27	11.0817	0.040141
ENSG00000180806	1893	10.8865	0.0416853
ENSG00000168702	1975.27	10.9478	0.0419149
ENSG00000151812	Inf	Inf	0.042274
ENSG00000122592	2080.91	11.023	0.0428863
ENSG00000003137	1521.86	10.5716	0.0430079
ENSG00000070748	Inf	Inf	0.0432709
ENSG00000165970	2489.45	11.2816	0.04446
ENSG00000015592	1430.88	10.4827	0.0450485
ENSG00000104435	1364.17	10.4138	0.0450757
ENSG00000269891	2378.18	11.2156	0.0454355
ENSG00000168875	1566.55	10.6134	0.0455246
ENSG00000107187	Inf	Inf	0.0460806
ENSG00000150361	Inf	Inf	0.0461977
ENSG00000105996	2280	11.1548	0.046355
ENSG00000170091	1347.55	10.3961	0.0468639
ENSG00000101958	Inf	Inf	0.04768
ENSG00000128652	1180.8	10.2055	0.0493923
ENSG00000198914	1205.92	10.2359	0.0496422

## Sheet: D18 vs D0 down
id	foldChange	log2FoldChange	pval
ENSG00000241186	0	-Inf	0.0157622
ENSG00000179059	0	-Inf	0.0177722
ENSG00000185885	0	-Inf	0.0182216
ENSG00000133980	6.72115e-05	-13.8609	0.019261
ENSG00000204531	0.000120867	-13.0143	0.0199951
ENSG00000143768	8.25821e-05	-13.5638	0.0211903
ENSG00000170373	8.71264e-05	-13.4865	0.0217235
ENSG00000161249	9.38497e-05	-13.3793	0.022486
ENSG00000129354	0	-Inf	0.0226971
ENSG00000167600	0.000130095	-12.9082	0.0233338
ENSG00000147869	0.000144846	-12.7532	0.0245239
ENSG00000164736	0	-Inf	0.0247291
ENSG00000104413	0	-Inf	0.0258432
ENSG00000050327	0	-Inf	0.0265752
ENSG00000159251	0	-Inf	0.0268784
ENSG00000240563	0.000307298	-11.6681	0.0319158
ENSG00000102755	0	-Inf	0.0329428
ENSG00000159166	0	-Inf	0.0341565
ENSG00000142273	0	-Inf	0.0346574
ENSG00000130182	0.000464722	-11.0713	0.0375547
ENSG00000179023	0	-Inf	0.037868
ENSG00000131203	0	-Inf	0.0393648
ENSG00000083307	0.00032829	-11.5727	0.0403624
ENSG00000185155	0	-Inf	0.0410107
ENSG00000148677	0	-Inf	0.0413555
ENSG00000130303	0.000541179	-10.8516	0.0414804
ENSG00000182866	0.000352589	-11.4697	0.0417447
ENSG00000153093	0	-Inf	0.0424019
ENSG00000177469	0.000487775	-11.0015	0.0431502
ENSG00000104518	0.000392131	-11.3164	0.0438946
ENSG00000111057	0.000760382	-10.361	0.0458118
ENSG00000146904	0.000803764	-10.2809	0.047921
ENSG00000164142	0.000506457	-10.9473	0.0495583
ENSG00000134954	0.000512404	-10.9304	0.0498344
