# Supplementary material for: Temporal expression profiles of lncRNA and mRNA in human embryonic stem cell-derived motor neurons during differentiation
Source: PeerJ. 2020 Nov 13;8:e10075. doi: 10.7717/peerj.10075 (PMC7668206; doi:10.7717/peerj.10075)
Supplement: File S5 [file peerj-08-10075-s005.xlsx]

## Sheet: GAPDH
sample names	gene name	Cт
ES D0-1	GAPDH	14.5389
ES D0-1	GAPDH	14.5493
ES D0-1	GAPDH	14.5421
ES D0-2	GAPDH	14.4851
ES D0-2	GAPDH	14.4238
ES D0-2	GAPDH	14.3656
ES D0-3	GAPDH	14.2746
ES D0-3	GAPDH	14.3376
ES D0-3	GAPDH	14.4248
ES D6-1	GAPDH	13.4422
ES D6-1	GAPDH	13.2877
ES D6-1	GAPDH	13.3205
ES D6-2	GAPDH	13.5265
ES D6-2	GAPDH	13.5167
ES D6-2	GAPDH	13.4952
ES D6-3	GAPDH	13.4296
ES D6-3	GAPDH	13.444
ES D6-3	GAPDH	13.405
ES D12-1	GAPDH	14.5692
ES D12-1	GAPDH	14.5883
ES D12-1	GAPDH	14.703
ES D12-2	GAPDH	14.7442
ES D12-2	GAPDH	14.7297
ES D12-2	GAPDH	14.7275
ES D12-3	GAPDH	14.7156
ES D12-3	GAPDH	14.7274
ES D12-3	GAPDH	14.6349
ES D12-4	GAPDH	14.6131
ES D12-4	GAPDH	14.5983
ES D12-4	GAPDH	14.7543
ES D18-1	GAPDH	17.5306
ES D18-1	GAPDH	17.6751
ES D18-1	GAPDH	17.6879
ES D18-2	GAPDH	15.6046
ES D18-2	GAPDH	15.5199
ES D18-2	GAPDH	15.5064
ES D18-3	GAPDH	16.2998
ES D18-3	GAPDH	16.3474
ES D18-3	GAPDH	16.303
ES D18-4	GAPDH	14.853
ES D18-4	GAPDH	14.9142
ES D18-4	GAPDH	14.8538

## Sheet: ZSCAN10
sample names	gene name	Cт
ES D0-1	ZSCAN10	18.4167
ES D0-1	ZSCAN10	18.4821
ES D0-1	ZSCAN10	18.3758
ES D0-2	ZSCAN10	18.3189
ES D0-2	ZSCAN10	18.2424
ES D0-2	ZSCAN10	18.2493
ES D0-3	ZSCAN10	18.1043
ES D0-3	ZSCAN10	18.2733
ES D0-3	ZSCAN10	18.2737
ES D6-1	ZSCAN10	28.1541
ES D6-1	ZSCAN10	28.0501
ES D6-1	ZSCAN10	28.3626
ES D6-2	ZSCAN10	28.3019
ES D6-2	ZSCAN10	28.2826
ES D6-2	ZSCAN10	28.3225
ES D6-3	ZSCAN10	27.4907
ES D6-3	ZSCAN10	27.4593
ES D6-3	ZSCAN10	27.5582
ES D12-1	ZSCAN10	25.8924
ES D12-1	ZSCAN10	26.0079
ES D12-1	ZSCAN10	25.9799
ES D12-2	ZSCAN10	25.3967
ES D12-2	ZSCAN10	25.3447
ES D12-2	ZSCAN10	25.385
ES D12-3	ZSCAN10	27.9315
ES D12-3	ZSCAN10	27.9339
ES D12-3	ZSCAN10	27.807
ES D12-4	ZSCAN10	27.1926
ES D12-4	ZSCAN10	27.1974
ES D12-4	ZSCAN10	27.316
ES D18-1	ZSCAN10	31.4917
ES D18-1	ZSCAN10	31.5599
ES D18-1	ZSCAN10	32.0311
ES D18-2	ZSCAN10	30.3709
ES D18-2	ZSCAN10	30.1633
ES D18-2	ZSCAN10	29.9634
ES D18-3	ZSCAN10	30.7654
ES D18-3	ZSCAN10	30.8197
ES D18-3	ZSCAN10	30.9297
ES D18-4	ZSCAN10	33.0566
ES D18-4	ZSCAN10	32.9333
ES D18-4	ZSCAN10	33.4815

## Sheet: OCT4
sample names	gene name	Cт
ES D0-1	OCT4	14.3437
ES D0-1	OCT4	14.6591
ES D0-1	OCT4	14.5845
ES D0-2	OCT4	14.5554
ES D0-2	OCT4	14.5399
ES D0-2	OCT4	14.5364
ES D0-3	OCT4	14.6756
ES D0-3	OCT4	14.6429
ES D0-3	OCT4	14.7462
ES D6-1	OCT4	24.0881
ES D6-1	OCT4	23.9572
ES D6-1	OCT4	23.9002
ES D6-2	OCT4	23.9347
ES D6-2	OCT4	23.9349
ES D6-2	OCT4	23.8868
ES D6-3	OCT4	23.8938
ES D6-3	OCT4	23.9453
ES D6-3	OCT4	23.9266
ES D12-1	OCT4	24.5225
ES D12-1	OCT4	24.3858
ES D12-1	OCT4	24.4783
ES D12-2	OCT4	24.7525
ES D12-2	OCT4	24.4842
ES D12-2	OCT4	24.4739
ES D12-3	OCT4	24.4522
ES D12-3	OCT4	24.6306
ES D12-3	OCT4	24.5399
ES D12-4	OCT4	24.3482
ES D12-4	OCT4	24.4785
ES D12-4	OCT4	24.2686
ES D18-1	OCT4	24.7514
ES D18-1	OCT4	24.8157
ES D18-1	OCT4	24.8241
ES D18-2	OCT4	24.4673
ES D18-2	OCT4	24.2683
ES D18-2	OCT4	24.1376
ES D18-3	OCT4	24.0689
ES D18-3	OCT4	24.1791
ES D18-3	OCT4	24.1115
ES D18-4	OCT4	29.4972
ES D18-4	OCT4	29.3451
ES D18-4	OCT4	29.2603

## Sheet: VRTN
sample names	gene name	Cт
ES D0-1	VRTN	17.6228
ES D0-1	VRTN	17.652
ES D0-1	VRTN	17.6084
ES D0-2	VRTN	17.5466
ES D0-2	VRTN	17.4946
ES D0-2	VRTN	17.5519
ES D0-3	VRTN	17.6187
ES D0-3	VRTN	17.6149
ES D0-3	VRTN	17.6086
ES D6-1	VRTN	22.1663
ES D6-1	VRTN	22.1782
ES D6-1	VRTN	22.2279
ES D6-2	VRTN	22.0689
ES D6-2	VRTN	22.0615
ES D6-2	VRTN	22.0399
ES D6-3	VRTN	21.5768
ES D6-3	VRTN	21.5095
ES D6-3	VRTN	21.4981
ES D12-1	VRTN	24.4431
ES D12-1	VRTN	24.4612
ES D12-1	VRTN	24.2682
ES D12-2	VRTN	23.7169
ES D12-2	VRTN	23.6621
ES D12-2	VRTN	23.7811
ES D12-3	VRTN	26.9472
ES D12-3	VRTN	26.7836
ES D12-3	VRTN	26.8868
ES D12-4	VRTN	25.8048
ES D12-4	VRTN	25.8712
ES D12-4	VRTN	25.8521
ES D18-1	VRTN	29.8169
ES D18-1	VRTN	29.6681
ES D18-1	VRTN	29.9885
ES D18-2	VRTN	29.9205
ES D18-2	VRTN	30.3622
ES D18-2	VRTN	30.568
ES D18-3	VRTN	32.2458
ES D18-3	VRTN	33.1562
ES D18-3	VRTN	32.5406
ES D18-4	VRTN	33.3112
ES D18-4	VRTN	31.9454
ES D18-4	VRTN	32.8703

## Sheet: HOXA3
samples	gene name	Cт
ES D0-1	HOXA3	29.9416
ES D0-1	HOXA3	29.6317
ES D0-1	HOXA3	29.6825
ES D0-2	HOXA3	29.7237
ES D0-2	HOXA3	29.6695
ES D0-2	HOXA3	29.7188
ES D0-3	HOXA3	29.9205
ES D0-3	HOXA3	29.8142
ES D0-3	HOXA3	29.9451
ES D6-1	HOXA3	20.42
ES D6-1	HOXA3	20.3752
ES D6-1	HOXA3	20.3798
ES D6-2	HOXA3	20.4973
ES D6-2	HOXA3	20.4738
ES D6-2	HOXA3	20.5421
ES D6-3	HOXA3	19.5615
ES D6-3	HOXA3	19.6129
ES D6-3	HOXA3	19.5737
ES D12-1	HOXA3	18.8598
ES D12-1	HOXA3	18.7864
ES D12-1	HOXA3	18.8033
ES D12-2	HOXA3	18.8969
ES D12-2	HOXA3	18.8866
ES D12-2	HOXA3	18.8964
ES D12-3	HOXA3	18.0564
ES D12-3	HOXA3	17.9902
ES D12-3	HOXA3	18.004
ES D12-4	HOXA3	17.9447
ES D12-4	HOXA3	17.9835
ES D12-4	HOXA3	17.8842
ES D18-1	HOXA3	19.1527
ES D18-1	HOXA3	19.0863
ES D18-1	HOXA3	19.1986
ES D18-2	HOXA3	17.6717
ES D18-2	HOXA3	17.7748
ES D18-2	HOXA3	17.6514
ES D18-3	HOXA3	18.0616
ES D18-3	HOXA3	18.4905
ES D18-3	HOXA3	17.8427

## Sheet: SP9
samples	gene name	Cт
ES D0-1	SP9	31.9341
ES D0-1	SP9	32.3347
ES D0-1	SP9	32.5004
ES D0-2	SP9	32.9084
ES D0-2	SP9	32.7245
ES D0-2	SP9	32.8766
ES D0-3	SP9	33.145
ES D0-3	SP9	32.512
ES D0-3	SP9	32.9564
ES D6-1	SP9	26.8856
ES D6-1	SP9	26.7009
ES D6-1	SP9	26.9171
ES D6-2	SP9	27.7979
ES D6-2	SP9	27.6516
ES D6-2	SP9	27.5484
ES D6-3	SP9	28.3248
ES D6-3	SP9	28.5671
ES D6-3	SP9	28.0733
ES D12-1	SP9	26.005
ES D12-1	SP9	25.9085
ES D12-1	SP9	25.9744
ES D12-2	SP9	26.2979
ES D12-2	SP9	26.1144
ES D12-2	SP9	26.4541
ES D12-3	SP9	27.0451
ES D12-3	SP9	26.8325
ES D12-3	SP9	26.8513
ES D12-4	SP9	27.0169
ES D12-4	SP9	27.1049
ES D12-4	SP9	26.6546
ES D18-2	SP9	23.721
ES D18-2	SP9	23.7373
ES D18-2	SP9	24.0851
ES D18-3	SP9	23.78
ES D18-3	SP9	23.4294
ES D18-3	SP9	23.5361
ES D18-4	SP9	24.0271
ES D18-4	SP9	23.747
ES D18-4	SP9	23.9374
