# Supplementary material for: Temporal expression profiles of lncRNA and mRNA in human embryonic stem cell-derived motor neurons during differentiation
Source: PeerJ. 2020 Nov 13;8:e10075. doi: 10.7717/peerj.10075 (PMC7668206; doi:10.7717/peerj.10075)
Supplement: File S6 [file peerj-08-10075-s007.xlsx]

## Sheet: Sheet1
transcript_id	D0	D6	D12	D18
ENST00000473358	0.62117	0.237553	0.356284	2.58061
ENST00000469289	0.01847	0	0	0.019776
ENST00000607096	0	0	0	0
ENST00000417324	0.027285	0.044878	0.048149	0.038479
ENST00000461467	0.034662	0	0	0
ENST00000466430	0.731828	0.636239	0.344262	1.34697
ENST00000477740	0	0	0	0
ENST00000471248	0.038499	0.049999	0	0.161343
ENST00000610542	0	0	0.005561	0
ENST00000453576	0.10784	0.041284	0	0.006773
ENST00000495576	0	0	0	0.037141
ENST00000493797	11.1192	5.22238	3.2549	3.63126
ENST00000484859	3.89641	2.287	1.42725	1.65797
ENST00000490997	0	0	0.053165	0.506812
ENST00000466557	11.0447	5.57737	5.48499	5.2657
ENST00000491962	0.913801	1.05914	1.00795	1.01521
ENST00000496488	0.428302	0.140119	0.090954	0.026662
ENST00000442116	0.396912	0.018237	0.012411	0.048485
ENST00000448958	0	0.388867	0	0.447951
ENST00000634344	0.046495	0	0	0
ENST00000424587	0.354672	0.005193	0.900147	1.31115
ENST00000335577	0.047482	0.05847	0	0.273813
ENST00000441866	0.036869	0.011328	0	0
ENST00000450983	0	0	0	0
ENST00000412666	0.006826	0	0	0
ENST00000635159	0.012537	0.06501	0.017354	0.012258
ENST00000431321	0.052385	0	0.293083	0.006626
ENST00000453935	0	0.026741	0.015874	0.053164
ENST00000440163	0.005035	0.10706	0.274867	0
ENST00000455207	0	0	0	0
ENST00000455464	0.111899	0.076437	0.083541	0.159608
ENST00000613471	0	0	0	0
ENST00000601814	0	0.145626	0.090186	0.506841
ENST00000431812	0	0	0	0
ENST00000419160	0.774763	0.558288	0.458877	0.445474
ENST00000440038	0.299536	0.17733	0.137959	0.100892
ENST00000423728	1.30423	0.05761	0.036173	0.03478
ENST00000599771	0.123899	0.126662	0.347327	0
ENST00000601486	0.185774	0.1057	0.001535	0.087191
ENST00000616947	0.501408	0.020344	0.022667	0
ENST00000616311	0.060178	0.162311	0.018687	0
ENST00000432964	0.076	0.009185	0.003108	0.016485
ENST00000608420	0	0	0	0
ENST00000417636	0	0.034535	0.024683	0.020838
ENST00000634833	0.012412	0.139335	0.349265	0.17233
ENST00000635509	0	0	0.030915	0
ENST00000634337	0	0	0	0.014186
ENST00000440196	0	0	0.007638	0.00811
ENST00000357876	0	0	0.000696	0.025435
ENST00000440200	0	0	0.12038	0
ENST00000452176	0	0.014614	0.026157	0.002772
ENST00000441245	0.042356	0.157195	0.105274	0.280546
ENST00000419394	0	0	0	0
ENST00000414688	0.082876	0.099392	0.001639	0.048817
ENST00000616585	0	0	0.037418	0.544698
ENST00000447954	0	0	0	0
ENST00000423796	0	0.011242	0	0.012981
ENST00000450696	0	0	0	0
ENST00000422528	0.054657	0.198259	0.091154	0.196661
ENST00000434264	0	0	0	0.033856
ENST00000457084	0.396353	0.267231	0.402032	0.100969
ENST00000589899	0.061616	0.023567	0.036671	0.018106
ENST00000609830	0	0	0	0
ENST00000429505	0	0.429649	0.721362	0.193268
ENST00000585826	0	0.031765	0.005329	0.002187
ENST00000592547	0.092234	0.143109	0.003418	0.001403
ENST00000586928	0	0	0.002317	0
ENST00000585745	0	0	0	0
ENST00000585768	0.79488	1.22861	0.01055	0.829415
ENST00000590848	0	0	0	0.664182
ENST00000591440	0	0	0	0
ENST00000587530	0	0.013964	0	0.019899
ENST00000593022	0	0.031852	0.043801	0.036032
ENST00000589531	0	0.149545	0	0
ENST00000588951	0	0.557115	0	0.049803
ENST00000586288	0.483098	0.072358	0.196425	0.015143
ENST00000591702	0.160569	0	0	0.267412
ENST00000443772	0.270343	0.034291	0	1.84656
ENST00000412115	0.186177	0.001614	0.107314	0.062264
ENST00000326734	0.524375	0.606916	0.413746	1.06254
ENST00000624927	0.126994	0.125583	0.134335	0.178082
ENST00000623808	0	0	0	0
ENST00000445118	0.731487	0.471889	0.618708	3.03499
ENST00000448975	0.233842	0	0.248248	0
ENST00000610067	0	0	0	0
ENST00000608189	0	0.109316	0.038822	0.466268
ENST00000441765	0.407561	1.09607	0.459933	0.804504
ENST00000609139	0.105993	0.040963	0	0.033742
ENST00000449005	0	0	0	0.108724
ENST00000416570	0	0	0	0
ENST00000623070	0	0	0	0.02242
ENST00000609009	0.008528	0.084798	0.091604	0.282952
ENST00000622921	0.049416	0.007305	0.036666	0.02903
ENST00000415295	0	0.008915	0.011314	0.013266
ENST00000425657	0.219821	0.302155	0.138062	0.291934
ENST00000473798	2.14088	0	3.79134	4.298
ENST00000446136	0	0.038831	0.041098	0.059308
ENST00000432963	0	0	0	0
ENST00000427857	0	0	0	0
ENST00000607769	0.845829	0.522218	0.091953	0.689936
ENST00000448179	3.04681	1.01778	0.882168	3.39976
ENST00000398216	0	0.0488	0.037699	0
ENST00000609207	1.2716	0.446867	0.32515	0
ENST00000417705	0	0	0	0
ENST00000432961	0	0	0	0
ENST00000606034	0	0	0	0
ENST00000458555	0.033721	0.135084	0.089427	0.166984
ENST00000418300	1.69834	0	0.287096	0.456886
ENST00000442292	0.225887	0.141384	0.095768	0.176373
ENST00000416774	0.025606	0	0	0
ENST00000606993	0	0	0.042114	0
ENST00000379317	0.079339	0	0.002942	0.017322
ENST00000565563	0	0	0.888247	0
ENST00000434139	0.08218	0.03769	0.031941	0.066466
ENST00000453732	0	0	0.101518	0
ENST00000444968	0.985492	0	0.017314	1.35481
ENST00000448629	0.351247	0.411405	0.519131	0.190183
ENST00000444362	2.70389	1.63319	1.94948	1.309
ENST00000418833	3.401	3.8313	2.55903	3.28549
ENST00000576232	0.395687	0.612782	0.57553	0.392352
ENST00000570344	0.855072	0.254246	0.747927	0.329145
ENST00000447725	0	0	0.094579	0
ENST00000572242	1.70867	1.31884	1.9242	2.16014
ENST00000453521	0.077111	0	0.243481	0.09925
ENST00000607307	0	0	0	0
ENST00000428932	0.170282	0.105163	0.205264	0.075096
ENST00000430109	0.756624	0.146985	1.99822	0.295655
ENST00000434150	0.706433	0.177151	1.32778	0.189032
ENST00000454562	0.034184	0	0.054654	0
ENST00000417917	0.019595	0	0.036551	0.003972
ENST00000366221	0	0	0	0
ENST00000607222	3.27241	4.17802	0	8.144
ENST00000607013	0.264383	0.221864	0.240313	0.156979
ENST00000598846	0.028707	0.279906	0.035183	0.029855
ENST00000412228	0	0	0	0.027567
ENST00000443930	0.03074	0	0	0
ENST00000445600	0	0	0	0
ENST00000449154	0.618579	0	0.113168	0
ENST00000606533	0	0.45477	0.093497	0.410274
ENST00000333854	1.21	0.462446	0.972153	0.620786
ENST00000444529	1.12815	1.6967	0.456929	0.788478
ENST00000442483	0.045362	0.258847	0.062977	0.05236
ENST00000607720	0	0	0	0
ENST00000607858	0	0.562375	0	0.193063
ENST00000424657	0.163909	0.101327	0.289897	0.701094
ENST00000442305	0.113871	0.518814	0.166992	0.248346
ENST00000606645	0	0	0	0
ENST00000449660	0	0	0.227564	0
ENST00000443892	0	0	0.003711	0
ENST00000416860	0.007077	0.182681	0.087255	0.127875
ENST00000448624	0	0	0	0
ENST00000432521	0.030939	0.263413	0.047829	0.752959
ENST00000452793	0	0	0	0
ENST00000456687	0	0.028376	0.044066	0.057243
ENST00000424215	0.099536	0.041566	0.331998	0.101376
ENST00000427302	0	0.03687	0.087107	0
ENST00000638002	0	0.022468	0.001741	0.031142
ENST00000457440	0	0	0	0
ENST00000429389	0	0	0	0
ENST00000606861	0	0	0	0.008354
ENST00000321399	0	0	0	0
ENST00000413472	0	0	0	0
ENST00000453118	0	0	0	0
ENST00000445317	0.084742	0.096748	0.0092	0
ENST00000415573	0	0	0	0
ENST00000420957	0	0	0	0
ENST00000321336	0.107352	0.129868	0	0.089968
ENST00000440516	0.090762	0.449836	0.146481	0
ENST00000624175	0.053534	0	0.054345	0
ENST00000607061	0.05305	0.337523	0.022018	0
ENST00000606489	0	0.030683	0	0
ENST00000435049	0	0.182287	0.155472	0.837283
ENST00000443034	0	0	0.110255	0.01616
ENST00000416554	0.035504	0	0	0.047955
ENST00000607459	6.65962	0	2.7943	0
ENST00000413332	0.694173	0.103425	0.426909	0.27641
ENST00000442673	0.141211	0	0.145134	0.389027
ENST00000439488	0	0.256823	0	0.109613
ENST00000635619	0	0	0.067914	0
ENST00000456897	0	0	0.074093	0
ENST00000412674	0.007688	0	0.038463	0.007517
ENST00000635247	0.011104	0	0.052947	0
ENST00000635127	0	0	0	0
ENST00000425194	0	0	0	0
ENST00000635002	0	0	0	0
ENST00000423197	0	0	0	0
ENST00000635312	0	0	0	0
ENST00000633821	0	0	0	0
ENST00000635642	0	0	0	0
ENST00000438791	0	0	0	0
ENST00000634256	0	0	0	0
ENST00000635556	0	0	0	0
ENST00000420522	0	0	0	0
ENST00000443270	0	0	0	0
ENST00000564261	0	0	0	0
ENST00000637702	0	0	0	0
ENST00000413887	0	0	0.033945	0
ENST00000455744	0.687414	0.98571	0.139089	0.055664
ENST00000441724	0.375021	0	0	0
ENST00000429480	0.07448	0.315073	0	0
ENST00000607670	0.910196	0	0	1.23717
ENST00000419034	0.243679	0.039778	0	0
ENST00000432429	0.000821	0	0	0.007227
ENST00000414210	0	0	0	0
ENST00000635029	0	0	0	0
ENST00000635092	0	0	0	0
ENST00000421469	0	0	0	0
ENST00000442889	0.189411	0.208203	0.186814	0.402098
ENST00000456701	0.169967	0.167919	0.148876	2.26675
ENST00000427317	0.296013	0.952337	0.427274	2.5781
ENST00000618051	0	0	0.057917	0.158922
ENST00000411708	0	0.356918	0.163359	0.753504
ENST00000440032	0.03452	0.190249	0.247938	0.601685
ENST00000602640	0	0	0	0
ENST00000602973	0	0	0	0
ENST00000602916	0	0	0	0
ENST00000602406	0.256703	0	0	0
ENST00000451646	0.833133	0.601947	0.527873	0.157175
ENST00000445300	0.180796	0.131435	0.594596	0.748179
ENST00000635451	0.033102	0	0.023195	0
ENST00000452982	0	0	0	0
ENST00000424689	0	0	0	0
ENST00000449895	0.057327	0.090858	0.102736	0.041245
ENST00000444276	0	0	0	0
ENST00000433876	0	2.71851	2.16856	0
ENST00000414948	2.72638	2.80353	0.506453	0.952494
ENST00000442636	0.034981	0.010624	0.039614	0.053441
ENST00000635687	2.31237	5.78031	0.841485	0
ENST00000385130	0	0	0	0
ENST00000635405	0.108075	0.156509	0.373649	0
ENST00000437157	0	0.266179	0.317202	0
ENST00000635271	0.083954	0.402639	0.344429	0.177937
ENST00000412639	0.033811	2.34341	1.28465	0.249392
ENST00000634966	0.007645	0.011583	0.046305	0
ENST00000632503	0.137523	0.836354	0.877193	0.143303
ENST00000441033	0	0	0	0
ENST00000377320	0.03418	0.12833	0.0057	0.033419
ENST00000415330	3.26044	0.967974	0.212331	0.204329
ENST00000454104	0.146956	0.027643	0.024508	0
ENST00000445884	0.031709	0	0.040232	0.070712
ENST00000413148	0	0	0	0
ENST00000607572	0	0	0	0
ENST00000424487	3.17088	2.79859	2.57585	1.38699
ENST00000606802	0.643723	0.506534	0.2592	5.87908
ENST00000607145	0	0	1.30941	0
ENST00000612387	0	0	0	0
ENST00000452378	2.12142	3.87294	1.87711	1.95451
ENST00000447600	0.631139	1.18154	0.742871	0.017836
ENST00000435388	0.049533	0	0.052809	0
ENST00000445982	0.035353	0.133001	0.02948	0.051849
ENST00000420480	0	0	0	0
ENST00000453135	0	0.009608	0.018347	0
ENST00000376620	0.237585	0.069103	0.023018	0.047224
ENST00000446542	0	0	0	0
ENST00000400892	0	0	0	0.030643
ENST00000416696	0.095803	0.093991	0.002268	0.179752
ENST00000606790	0	0	0	0
ENST00000438401	0	0	0	0
ENST00000437631	0	0	0	0
ENST00000432559	0	0	0	0
ENST00000563570	0.125402	0	0	0
ENST00000441809	0	0	0	0
ENST00000449215	0	0	0	0
ENST00000447908	0.028708	0.14114	0.147984	0.516935
ENST00000310916	0.41037	0.174903	0.258376	0.69038
ENST00000404665	0.032304	0	0	0.128181
ENST00000424792	0	0	0	0
ENST00000625027	0.129234	0.024983	0	0
ENST00000428747	0.0556	0.152829	0.046854	0
ENST00000439788	0.0016	0.016122	0	0
ENST00000427824	0.034197	0.013035	0.040669	0.019361
ENST00000606186	0	0	0	0
ENST00000428945	0.102907	0.101401	0.143404	0.393516
ENST00000606262	0	0	0	0
ENST00000623689	0.589174	0.238234	0.449452	0.41033
ENST00000615472	0.143366	0.665233	0.082582	0.158284
ENST00000453804	0.537904	0.471131	0.21406	0.304367
ENST00000418525	0.123728	0.017637	0.032524	0.210309
ENST00000317122	0	3.2e-05	0	0
ENST00000437156	0.053484	0.025152	0	0
ENST00000424774	0.962485	0	0.059475	0.479201
ENST00000426353	0.223264	0.086182	0.158803	0.041596
ENST00000457809	0	0	0	0
ENST00000457898	0.925727	1.49806	1.08213	1.63053
ENST00000562878	0.370712	0.168525	0	0
ENST00000452795	0.034844	0	0	0
ENST00000415386	2.28044	0	3.08631	0
ENST00000614408	0.517569	0	0.198327	0.35874
ENST00000607700	0.073276	0	0	0
ENST00000633763	0.486526	0.601424	0.720662	0.753736
ENST00000624517	0.220822	0.023486	0	0
ENST00000633433	0.409214	0.602966	0.62501	0.558937
ENST00000414340	0	0	0	0
ENST00000422345	0	0	0	0
ENST00000414128	0.056516	0.018782	0	0.027629
ENST00000438002	0	0	0.831477	0
ENST00000619677	0	0	0	0
ENST00000451828	0	0	0	0
ENST00000453554	0	0	0.208448	0
ENST00000457856	0.022987	0	0.001094	0
ENST00000422124	2.79738	0.139663	0	0
ENST00000416869	0.325608	0	0	0
ENST00000457075	0.623197	0.112612	0.03644	0
ENST00000606899	0	0	0	0
ENST00000446261	0.288425	0.244126	0.228418	0.677169
ENST00000412427	0	0	0.008889	0
ENST00000634972	0	0	0	0
ENST00000635428	0	0	0	0
ENST00000439577	48.3951	19.3429	17.1243	12.8385
ENST00000430540	0	0	0	0.013316
ENST00000569711	0	0	0	0
ENST00000624418	0	0.078766	0	0.521629
ENST00000419667	0.057962	0.054515	0.161809	0.056672
ENST00000420211	0.116033	0	0	0.111088
ENST00000606379	0	0	0	0
ENST00000437898	0.737203	0.775146	1.31469	0.747948
ENST00000416470	0.09231	0	0	0.218834
ENST00000454736	0	0	0	0
ENST00000417884	0	0	0	0
ENST00000431027	0	0	0	0
ENST00000442226	0	0.158992	0.040751	0.107373
ENST00000435552	0	0	0	0
ENST00000444923	0	0	0.018151	0
ENST00000426428	0	0	0.02928	0.016284
ENST00000635577	0	0	0	0
ENST00000635564	0	0.010166	0	0.005883
ENST00000418743	0	0	0	0
ENST00000423486	0	0	0	0
ENST00000421114	0	0	0	0
ENST00000451424	0	0	0	0.783863
ENST00000436642	0	0.11145	0	0.226244
ENST00000416959	0.094215	0.189455	0.086237	0.168526
ENST00000449034	0.1429	0.803232	0.343226	0.694401
ENST00000444647	0	0	0	0
ENST00000423921	0	0	0	0
ENST00000457706	0.120668	1.04034	0.309	0.089343
ENST00000455966	0	0.006011	0.027683	0.013783
ENST00000635097	0.023731	0	0.032237	0
ENST00000635675	0	0.032717	0.097848	0.022901
ENST00000434233	0	0	0	0
ENST00000634934	0.044129	0.016301	0.013347	0
ENST00000634712	0	0	0	0.029994
ENST00000634451	0.128022	0.209831	0.075606	0.082216
ENST00000635450	0.457921	0.33133	2.15179	1.34965
ENST00000420503	0.025642	0	0.049166	0
ENST00000416769	3.75663	1.83655	1.82547	0.390951
ENST00000452322	0.022896	0.066579	0.035974	0
ENST00000404210	0	0	0	0
ENST00000431803	0.401473	0.610737	0.713491	0.817401
ENST00000606754	0	0	0	0.192128
ENST00000624125	0	0	0	0
ENST00000438551	0	0	0	0
ENST00000419644	0.191255	1.29709	0.639368	1.72258
ENST00000427154	0.917417	2.50371	1.24646	0.671547
ENST00000566551	0	0.42613	0.007928	0.02456
ENST00000604481	0	0	0	0
ENST00000458053	0	0	0.210274	0
ENST00000454117	0.062068	0.385957	0.828109	0.258766
ENST00000335648	0.331244	0.548338	1.21432	1.0141
ENST00000518821	0.116648	0.638408	1.4726	0.385934
ENST00000437367	0.143807	1.31824	1.45796	0.030017
ENST00000518600	0	0.145583	0.24144	0.021388
ENST00000605350	0.03272	0	0.029416	0
ENST00000451217	0.064986	0.035634	0.048269	0
ENST00000427796	0.035427	0	1.2535	7.30537
ENST00000447961	0.685724	0.924527	0.471604	0.367348
ENST00000411815	0	0	0	0
ENST00000439239	0	0	0	0
ENST00000429191	0.027032	0	0	0
ENST00000439059	0.01348	0	0.002098	0
ENST00000437965	0.031116	0.010041	0	0
ENST00000577528	1.12136	0.115504	0.035957	0.084321
ENST00000456316	0.005674	0.020354	0	0
ENST00000568143	0	0.009595	0.024387	0
ENST00000424084	0	0	0	0
ENST00000429666	0	0	0	0
ENST00000455902	0	0.001198	0	0.003137
ENST00000607698	0	0.604162	0	0
ENST00000412797	0.616229	0.357409	0.048203	0
ENST00000436991	0.505758	0.493353	0.102171	0.109645
ENST00000442055	0	0	0	0
ENST00000453649	0.136912	0.19775	0	0
ENST00000536896	0	0	0	0
ENST00000606617	0	0.768263	0.744669	0
ENST00000455431	0.014519	0.063047	0.081613	0.014351
ENST00000423060	0	0	0.694186	0.819546
ENST00000569378	0.250151	0	0.388297	0.570395
ENST00000448791	0	0	0	0
ENST00000425205	0.011837	0	0	0
ENST00000492975	0.051633	0.05477	0	0
ENST00000443579	0.49818	0.331328	0.261696	0.296156
ENST00000440492	0	0.00815	0	0
ENST00000430683	0	0.086288	0.030601	0
ENST00000626608	0	0	0	0
ENST00000628586	0	0	0	0
ENST00000625232	0	0.000238	0	0.015431
ENST00000628584	0	0	0	0
ENST00000629895	0	0	0	0
ENST00000602607	0	0	0	0
ENST00000602843	0	0	0	0
ENST00000448015	0.163112	0	0.006914	0
ENST00000604716	0	0	0.150046	0
ENST00000605846	0	0.042287	0.133664	0.113913
ENST00000413987	0	0.192231	0.00339	0
ENST00000447507	0.572269	0.436355	0.547887	0
ENST00000437681	0.012749	2.46136	17.9394	0.134517
ENST00000624273	0	0	0	0
ENST00000464612	0.043354	0.057113	0.017603	0
ENST00000475441	0.125311	0	0	0
ENST00000531126	0.111897	0.777481	0.500333	0
ENST00000461448	0.158337	0.617083	1.66722	0.846448
ENST00000470977	0.427151	0.152788	0	0
ENST00000474814	0.236027	0.972468	0.687322	1.02004
ENST00000481368	0.248812	1.10111	1.07271	0.729189
ENST00000481220	0.151125	0.561561	0.275724	0.405943
ENST00000488745	0.112732	0.389139	0.232598	0.039141
ENST00000483436	0	0	0	0
ENST00000464115	1.35747	0.279492	0.152801	0.030743
ENST00000461832	5.45716	0	0.256476	0.125256
ENST00000420776	0.076397	0.033625	0.016653	0.141371
ENST00000427804	0.040379	0.046475	0.074935	0.12466
ENST00000602813	0	0	0	0
ENST00000418471	0.442118	0.068416	0.023369	0.072171
ENST00000413004	0.045695	0.035848	0.011174	0.133509
ENST00000427046	0.108742	0.285552	0.113648	0.085057
ENST00000417651	0.01841	0.113206	0.016985	0.090759
ENST00000422638	0	0	0	0
ENST00000445180	0.019878	0	0	0
ENST00000441046	0	0	0	0
ENST00000427319	0	0	0	0
ENST00000420354	0	0	0	0
ENST00000414532	0.094539	0.178598	0.54907	0.133887
ENST00000454613	0	0	0.053203	0
ENST00000414763	0.089713	0.107922	0.45459	0
ENST00000443076	0.245157	0.095985	0.095651	0
ENST00000440358	0.096364	0	0.016695	0
ENST00000430320	0	0	0.009379	0.021994
ENST00000635357	0	0	0	0
ENST00000635044	0	0	0	0
ENST00000635288	0	0	0	0
ENST00000634319	0	0	0	0
ENST00000635009	0	0	0	0
ENST00000634587	0	0.008534	0.009299	0.102646
ENST00000634980	0	0	0	0
ENST00000438790	0	0	0	0
ENST00000431202	0	0.026836	0	0.013949
ENST00000430143	0.085161	0.026699	0	0.05551
ENST00000435872	0	0.039664	0	0
ENST00000623791	0.087218	0	0	0
ENST00000610043	0.018571	0.112611	0.057731	0.061353
ENST00000609625	0	0	0	0
ENST00000609549	0	0	0	0
ENST00000608332	0	0	0	0
ENST00000623425	0	0	0	0
ENST00000585660	0	0	0	0
ENST00000591592	0	0	0	0
ENST00000608246	0.079834	0	0	0
ENST00000608888	0	0	0	0
ENST00000610216	0.009863	0	0	0
ENST00000607926	0	0	0	0.012309
ENST00000585413	0	0	0.037134	0.039892
ENST00000609033	0	0	0	0
ENST00000589462	0	0	0	0
ENST00000624388	0	0	0.002951	0
ENST00000593188	0	0	0	0
ENST00000609373	0	0	0	0
ENST00000587445	0	0	0	0
ENST00000591929	0	0	0	0
ENST00000609338	0	0	0	0
ENST00000445166	0	0	0	0
ENST00000623786	0	0	0	0
ENST00000588288	0	0	0	0
ENST00000581333	0.102527	0.20344	0.006783	0.038553
ENST00000527035	0.023206	0.088033	0.022713	0
ENST00000453837	1.55593	2.02359	1.17911	1.65436
ENST00000602889	0.077302	0.1896	0.255846	0.185529
ENST00000447478	0.241928	0.417806	0.140698	0.245732
ENST00000366152	0.728219	0.885128	0.014442	0.131524
ENST00000515055	0.000508	0	0	0
ENST00000373604	0	0	0	0.395301
ENST00000421616	0.037349	0.184501	0.05153	0.707828
ENST00000448134	0.280765	0.085304	0.15505	0.406149
ENST00000421619	0.121569	0	0.026308	0.061693
ENST00000633169	1.64258	0.114524	0.121931	1.79151
ENST00000623226	0	0	0	0
ENST00000427524	0.027693	0.069766	0.011216	0.118266
ENST00000622988	0	0	0	0
ENST00000624339	0.63673	0	1.23608	0
ENST00000602618	0	0	0	0
ENST00000627421	0	1.8334	0.000331	1.07288
ENST00000588828	0	0	0	0
ENST00000624453	0	0	0	0.003486
ENST00000630229	0	0	0	0
ENST00000457957	0	0	0	0
ENST00000587696	0	0.136502	0.075848	0.17559
ENST00000625117	0	0	0	0
ENST00000624012	0.183665	0.726678	0	0.884527
ENST00000628643	0	0	0	2.46999
ENST00000630909	0	0.15917	0.261547	0.67177
ENST00000627130	0.151551	0.768359	1.00261	1.46243
ENST00000432703	0.213943	0.903606	0.714733	0.13237
ENST00000425631	0.033912	0.135127	0.050982	0.044566
ENST00000434181	0.042528	0.07703	0.059181	0.018602
ENST00000432447	0	0	0	0
ENST00000414868	0	0	0	0
ENST00000438719	0	0	0	0
ENST00000431046	0	0	0	0
ENST00000542839	0.022253	0.143779	0.120623	0.083834
ENST00000429293	1.87759	2.22553	3.59836	4.20544
ENST00000417456	0.478056	0.061488	0.237573	0.209881
ENST00000311990	0.073487	0.49396	0.04822	0.03562
ENST00000432683	0.491596	0.575737	0.158477	0.456585
ENST00000425881	0.408963	0.348154	0.006676	0.537247
ENST00000444348	0.668298	0.538467	0.225926	0.579226
ENST00000373226	0.046241	0.086836	0.027505	0
ENST00000606838	0	0	0.071026	1.20901
ENST00000466576	0	0	0	0.0332
ENST00000479395	0	0	0	0
ENST00000373137	4.86103	0	2.23058	0.787749
ENST00000451375	0.139328	0	0.124688	0.008772
ENST00000413901	0	0.017306	0	0.032457
ENST00000424989	0.468458	0.47777	0.038706	0.037213
ENST00000433474	3.07689	1.02941	2.8261	16.4772
ENST00000419993	3.55668	3.51005	0.000144	2.20756
ENST00000432922	0.350322	0.717545	2.13425	0.185708
ENST00000428151	0.19092	0.827117	3.41071	1.12905
ENST00000431311	0.064192	0.250056	0.44453	0.058707
ENST00000634732	0	0	0.050322	0.019668
ENST00000634464	0	0	0	0
ENST00000634298	0	0	0	0
ENST00000452971	0	0	0	0
ENST00000622355	0	0	0	0.000147
ENST00000433671	0.029839	1.61269	0.728071	2.48261
ENST00000456813	0	0	0.04558	0
ENST00000443161	0.001959	0	0	0
ENST00000602528	0	0	0	0
ENST00000289890	0	0	0	0
ENST00000441741	0.998793	1.10707	0.915071	1.11155
ENST00000331856	1.18948	1.71944	1.31277	2.27915
ENST00000458207	0.26471	0.49454	0.434001	0.498645
ENST00000450157	0.120769	0.545631	0.482701	0.377394
ENST00000431553	0.449763	0.601396	0.50537	1.55781
ENST00000417869	1.97236	3.89608	4.28484	4.83671
ENST00000440190	0.917398	2.85285	1.64012	2.87641
ENST00000415255	0.153794	0.12678	0.078707	0.130911
ENST00000424418	0	0	0.193967	0
ENST00000566366	0.148097	0.0392	0.047498	0.010188
ENST00000418255	0	0	1.63529	0
ENST00000567508	0	0	4.41987	3.60273
ENST00000565390	0	0.144599	0	0
ENST00000624658	0	0.022858	0.051699	0.101194
ENST00000450713	0.14214	0.258162	0.169551	0.485247
ENST00000453437	0.363471	0.745931	0.288012	0.10793
ENST00000437060	0.319839	0.444214	0.041617	0.300222
ENST00000440100	0.451036	0.426105	0.058069	0.094483
ENST00000606277	0	0	3.38015	0
ENST00000414199	0	0.00647	0	0
ENST00000626479	0	0	0.000331	0
ENST00000425554	0.287967	0.12709	0.20868	0.086734
ENST00000445073	0	0	0	0
ENST00000422305	0.024651	0	0	0
ENST00000429109	0.037898	0.178488	0.278866	0.177303
ENST00000440249	0	0	0	0.091958
ENST00000436207	0.489602	0.101426	0.510196	0.29862
ENST00000414339	0.500602	0.349737	1.24387	0.035952
ENST00000447572	0.166501	0.192924	0.257641	0.233955
ENST00000414798	0.912834	0.037397	0.648297	0.000158
ENST00000416809	0.396393	0.256388	0.194463	0.150681
ENST00000444563	0.046917	0	0.017035	0
ENST00000425076	0.014905	0	0	0
ENST00000431759	0.492864	0	0	0
ENST00000416689	0.908872	0.274634	0.241385	0.135767
ENST00000424948	0.577852	0.556809	0.89128	0.285858
ENST00000436713	0.280491	0.355844	0.63875	0.978423
ENST00000396885	1.63003	2.29653	1.09418	3.19065
ENST00000444386	0.350561	0.532714	0.410227	1.52954
ENST00000398804	0	0.020591	0.007255	0.296374
ENST00000439057	0.882836	0.725212	0.518675	0.041526
ENST00000434346	0.253953	0.94992	0.239524	0.089191
ENST00000453015	5.19106	1.23993	3.38633	8.90295
ENST00000418149	0.113012	0.323349	0.161322	0.024485
ENST00000437753	0.02604	0	0.047563	0
ENST00000446167	0.480353	0.320346	0.43912	0.667062
ENST00000445226	0	0.093371	0	0
ENST00000412378	0	0	0	0.12246
ENST00000623351	0.173113	0.362895	0.64085	0.257088
ENST00000624869	0	0	0	0
ENST00000607988	0.062021	0.070043	0.044754	0.033939
ENST00000609636	0	0	0.053221	0.019086
ENST00000609472	0	0	0	0
ENST00000610167	0	0	0.01901	0
ENST00000434244	0.016716	0	2.9e-05	0.0032
ENST00000630871	0.089728	0	0	0
ENST00000626342	0	0	0.094671	0.062019
ENST00000626430	0	0	0	0
ENST00000628234	0	0	0	0
ENST00000616338	0	0.114466	0	0
ENST00000431800	0	0	0	0
ENST00000437643	0	0	0	0
ENST00000453688	0	0	0	0
ENST00000447959	0	0	0	0
ENST00000609027	0	0.012469	0	0
ENST00000630008	0.000934	0	0	0.005676
ENST00000627824	0	0	0	0
ENST00000625367	0	0	0	0
ENST00000628123	0.007987	0	0.004814	0
ENST00000627999	0	0	0	0
ENST00000625982	0	0	0	0
ENST00000414156	0.634476	2.06068	0.859797	1.8519
ENST00000440985	0.743801	0.510809	0.468909	0.333883
ENST00000428791	1.99536	1.57907	2.19894	1.10388
ENST00000626198	0	0	0	0
ENST00000430643	0.680986	0.847274	0.498376	0.753221
ENST00000450004	0	0.715645	0.032023	0.519419
ENST00000452785	0	0	0	0
ENST00000416581	0	0	0	0
ENST00000634819	0.102974	0.036287	0	0.052298
ENST00000602433	0.0982	0.201338	0.1092	0.114386
ENST00000442839	0.074771	0.046883	0.020783	0
ENST00000418985	0	0	0	0
ENST00000444042	0.289176	0.216712	0.134206	0.069625
ENST00000429328	0.169378	0.045157	0.031442	0
ENST00000422216	0	0.004801	0.013921	0
ENST00000420876	0	0	0	0.050453
ENST00000445551	0.158939	0	0	0.086766
ENST00000454285	0	0.041343	0.039604	0
ENST00000438589	0	0	0	0
ENST00000445070	0.783021	0.768237	0.205224	0
ENST00000635446	0	0.011989	0.041251	0.081995
ENST00000456803	0	0	0	0
ENST00000439795	0.150679	0.115078	0	0.030886
ENST00000455238	0	0	0	0
ENST00000431986	0.064064	0.036008	0	0
ENST00000606809	0	0.833369	0	0
ENST00000624985	0.052471	0	0	0
ENST00000456002	0	0	0	0
ENST00000420071	0	0	0.0213	0
ENST00000457061	0	0	0	0.048978
ENST00000622945	0	0	0	0.019229
ENST00000442477	0	0	0	0.248612
ENST00000440897	0	0	0	0.194951
ENST00000424664	0	0	0	0
ENST00000366181	0	0.000198	0	0.036689
ENST00000422306	0.164821	0.107777	0.098899	0.168061
ENST00000564479	0.145286	0	0.025595	0.006802
ENST00000568425	0.039088	0	0	0
ENST00000424246	0	0.099805	0.030653	0
ENST00000415031	0.126659	0.339232	0.446615	0.102891
ENST00000426017	0	0	0	0
ENST00000629102	0.088842	0.215862	0.088225	0.158448
ENST00000588291	0	0	0	0
ENST00000586761	0	0	0	0.010112
ENST00000591675	0.067308	0.038153	0.057433	0.286197
ENST00000607338	0.13352	0	0.074225	0
ENST00000425802	2.32163	1.11537	1.98612	2.05718
ENST00000428794	0.063743	0	0	0
ENST00000606527	0	0	0.797304	0
ENST00000607321	0.054657	0	0.091002	0
ENST00000446786	0.050285	0	0	0
ENST00000447867	0.597386	0.150588	0.470252	0.078273
ENST00000439621	0.183209	0	0	0
ENST00000629810	0.407018	0.730008	0.146843	0.286784
ENST00000452466	0.219566	0.066047	0.094915	0.042512
ENST00000569869	0	0.103488	0.22272	0
ENST00000458151	0.276949	0.389169	0.402745	0.093954
ENST00000432653	0.22449	0.349128	0.221096	0.472169
ENST00000421637	2.8173	4.20187	1.75871	2.48743
ENST00000450469	0	0	0	0
ENST00000446686	0.304255	0.137157	0.161861	0.260108
ENST00000445039	0.453807	0.739997	0.386557	0.589025
ENST00000429099	0.032537	0	0	0
ENST00000449958	0.014661	0	0.048901	0
ENST00000624679	0	0	0	0
ENST00000623663	0.071058	0.182931	0.155061	0.007356
ENST00000361350	1.27531	1.66392	0	0
ENST00000426901	1.34332	0.904181	1.10045	2.72744
ENST00000447150	0	0	0	0
ENST00000433377	0	0	0	0
ENST00000416119	0.251237	0.037627	0	0.019558
ENST00000450503	0	0	0	0
ENST00000415336	0.105132	0	0.37222	0
ENST00000443284	0.234635	0	0.429444	0
ENST00000436033	0	0	0	0
ENST00000455380	0	0	0	0
ENST00000433690	0	0	0	0
ENST00000436960	0.107149	0	0	0
ENST00000451250	0	0	0.001629	0.039851
ENST00000422374	0	0	0	0.012475
ENST00000634769	0	0	0	0
ENST00000424357	0	0	0	0
ENST00000635532	0	0	0	0
ENST00000458145	0	0	0	0
ENST00000455010	0	0	0	0
ENST00000435828	0	0	0	0
ENST00000569425	0.013661	0.037768	0.005025	0.020733
ENST00000451914	0.053912	0.062797	0.076268	0.022357
ENST00000635434	0.208421	0	0	0
ENST00000425435	0	0.006426	0	0
ENST00000417420	0	0	0	0
ENST00000422038	0.230345	0.149655	0.102839	0.103717
ENST00000585589	0	0	0	0
ENST00000416598	0.059314	0.03715	0	0.01931
ENST00000592753	0	0	0	0
ENST00000585576	0	0	0	0
ENST00000608806	0	0	0	0
ENST00000610197	0	0	0	0
ENST00000420811	0	0	0	0
ENST00000432897	0	0	0	0
ENST00000434141	0	0	0	0
ENST00000610175	0	0	0	0
ENST00000608833	0	0	0	0
ENST00000591882	0	0.043464	0	0
ENST00000587466	0	0	0	0
ENST00000588227	0.09204	0.192846	0.072443	0
ENST00000592898	0	0	0	0
ENST00000590080	0	0	0	0
ENST00000588058	0	0	0	0
ENST00000592838	0	0	0	0
ENST00000591523	0	0	0	0
ENST00000591173	0	0	0	0
ENST00000457412	0	0	0.027934	0
ENST00000627488	0	0	0	0
ENST00000628850	0	0	0	0
ENST00000628558	0	0.035197	0	0
ENST00000586465	0	0	0	0
ENST00000608580	0	0	0	0.032107
ENST00000609323	0.037763	0.053276	0.015745	0
ENST00000419596	0.0201	0	0	0.039305
ENST00000637377	0	0	0	0.010982
ENST00000636386	0.239989	0.887226	0.448673	0.863262
ENST00000419531	0	0	0.035334	0.094191
ENST00000607372	0.023293	0	0	0.045549
ENST00000424592	0	0	0	0
ENST00000423408	0.02846	0	0	0
ENST00000634986	0	0	0	0
ENST00000635492	0.099014	0	0	0
ENST00000634763	0	0	0	0.012928
ENST00000427292	0	0	0	0
ENST00000634502	0.024198	0	0	0.011514
ENST00000634569	0	0	0	0
ENST00000447329	0	0	0	0
ENST00000438195	0	0	0	0
ENST00000424308	0	0	0	0
ENST00000635515	0	0	0	0
ENST00000635072	0	0	0	0
ENST00000449812	0	0	0	0
ENST00000635571	0	0	0	0
ENST00000631169	0	0	0	0
ENST00000625548	0	0	0	0
ENST00000422198	0.023806	0	0	0
ENST00000451090	0	0	0	0
ENST00000425914	0	0	0	0
ENST00000585367	0	0	0	0
ENST00000592607	0	0	0	0
ENST00000624582	0	0	0	0
ENST00000625069	0	0	0	0
ENST00000623433	0	0	0	0
ENST00000624265	0	0	0	0
ENST00000587839	0	0	0	0
ENST00000631064	0	0	0	0
ENST00000436225	0	0	0	0
ENST00000604999	0	0.063805	0	0
ENST00000443012	0.016248	0	0	0
ENST00000456878	0	0	0	0
ENST00000634836	0.035239	0.065415	0.01756	0.019419
ENST00000635048	0.004009	0.013903	0.017685	0.009791
ENST00000635616	0	0.077874	0	0
ENST00000439156	0.014704	0.107733	0.035563	0.035331
ENST00000634281	0.017405	0.06019	0.003628	0
ENST00000423403	0	0.050003	0	0.020793
ENST00000635290	0	0.005243	0	0
ENST00000634701	0	0	0	0
ENST00000438559	0	0	0	0.163201
ENST00000418662	0	0	0	0
ENST00000421455	0	0	0	0.039855
ENST00000603233	0	0	0	1.55442
ENST00000442027	0	0	0	0
ENST00000617929	0	0	0	0
ENST00000626805	0	0	0	0
ENST00000596354	0	0	0	0
ENST00000596404	0	0	0	0
ENST00000630199	0	0	0	0
ENST00000630993	0	0	0	0
ENST00000605725	0	0	0	0
ENST00000624477	0.118201	0.528711	0.244202	0.435041
ENST00000453229	0.350918	0.884325	0.381023	0.450101
ENST00000450811	0	0	0	0
ENST00000420285	0	0	0	0
ENST00000425352	0	0	0	0
ENST00000420659	0	0	0	0
ENST00000418091	0	0	0	0
ENST00000427547	0	0	0	0
ENST00000455038	0	0	0.009596	0
ENST00000432537	0	0	0	0
ENST00000635458	0	0	0	0
ENST00000447183	0	0	0	0
ENST00000634725	0	0.00053	0	0
ENST00000635555	0	0	0	0.04451
ENST00000634576	0.016716	0	0	0
ENST00000635218	0	0	0	0
ENST00000455304	0	0	0	0
ENST00000418086	0	0	0	0
ENST00000436475	0.034359	0	0	0
ENST00000449140	0.001073	0	0.000221	0
ENST00000426393	17.3718	0.102178	0.230235	0.14263
ENST00000418244	1.87231	0.050951	0	0.165822
ENST00000449386	0.419686	0.319167	0	0.790248
ENST00000431294	1.30192	0	0	0
ENST00000427268	0.798511	0	0	0
ENST00000371086	0.139797	0.715888	0.502067	0.810377
ENST00000412349	0.124249	0.044679	0.035387	0
ENST00000424995	0.079929	0.18055	0.020698	0.066757
ENST00000447748	0.207981	0.282133	0.308982	0.436788
ENST00000635398	0	0	0	0
ENST00000635626	0.127205	0.116765	0.154049	0
ENST00000634775	0	0	0	0
ENST00000634604	0	0.020169	0.000131	0
ENST00000444349	0	0	0	0
ENST00000415842	0	0.091877	0.057216	0.131089
ENST00000436350	0.289057	0	0.271267	0
ENST00000634799	0	0	0	0
ENST00000607528	0	0	0	0
ENST00000448344	0.616546	0	0	4.51032
ENST00000435739	0	0.022129	0.014686	0.138428
ENST00000429871	0	0	0	0
ENST00000424138	0	0	0	0.053084
ENST00000502413	0.015452	0.123645	0.038254	0.59511
ENST00000456389	0	0	0	0
ENST00000621423	0	0	0	0
ENST00000635350	0	0	0	0.014392
ENST00000634424	0	0	0	0
ENST00000230113	0	0	0	0
ENST00000420587	0.139582	0.211674	0.155314	0.205258
ENST00000413628	0	0.535979	0	0
ENST00000414904	0	0	0	0
ENST00000434072	0.081628	1.45972	0.110989	0.125214
ENST00000425820	0.246121	0.152044	0.235253	0.050769
ENST00000428732	0	0.018798	0.014463	0.063462
ENST00000425517	0	0	0.009944	0
ENST00000439878	0	0.027006	0	0
ENST00000448001	0	0	0	0
ENST00000414132	0	0	0	0
ENST00000425754	0	0.016889	0	0.135188
ENST00000422107	0.076397	0.209542	0.164208	0.18106
ENST00000413943	0	0	0	0
ENST00000607679	0	0.389685	0.091129	0.095175
ENST00000419450	0.003345	0	0	0
ENST00000423187	0	0	0	0
ENST00000426775	0	0	0	0
ENST00000602605	0	0	0	0
ENST00000450461	0	0	0	0
ENST00000426999	0.04106	0	0	0.039879
ENST00000455406	0	0.022613	0.026543	0
ENST00000583678	0	0	0.031352	0
ENST00000634641	0	0	0	0
ENST00000627548	0	0	0	0
ENST00000599146	0	0	0	0
ENST00000626344	0	0	0	0
ENST00000630994	0	0.04315	0	0.036939
ENST00000630926	0	0	0	0
ENST00000627516	0	0	0	0
ENST00000627902	0	0.010499	0	0
ENST00000596952	0	0	0	0
ENST00000625896	0	0	0	0
ENST00000413421	0	0.019676	0	0
ENST00000628635	0	0	0.023639	0.041526
ENST00000628683	0	0	0	0
ENST00000628797	0	0	0	0.046358
ENST00000626510	0	0	0	0
ENST00000628450	0	0	0.002228	0.016491
ENST00000594152	0	0.004906	0	0
ENST00000630885	0	0.011763	0	0
ENST00000628670	0	0	0	0
ENST00000630350	0	0.028668	0	0.028262
ENST00000415780	0	0	0	0
ENST00000600103	0	0	0	0
ENST00000411721	0	0	0.038793	0
ENST00000608579	0	0	0	0
ENST00000430605	0	0	0	0
ENST00000586006	0.018899	0	0.035571	0.080974
ENST00000587306	0	0	0	0
ENST00000587066	0	0	0	0
ENST00000585499	0	0	0	0
ENST00000585415	0	0.049517	0	0.052636
ENST00000623721	0	0.005379	0.000428	0.01728
ENST00000590186	0	0	0	0.011841
ENST00000625045	0	0	0	0.11872
ENST00000591654	0	0	0	0
ENST00000624050	0	0	0	0.016653
ENST00000608360	0.03452	0	0	0
ENST00000446438	0	0	0	0
ENST00000453121	0	0	0	0.119791
ENST00000445976	0.156486	0.044505	0.147371	0.054219
ENST00000418078	0	0.016962	0.024734	0
ENST00000623251	0	0	0	0
ENST00000440762	0	0	0	0
ENST00000635317	0	0	0	0
ENST00000444827	0	0	0	0
ENST00000415686	0	0	0	0
ENST00000411903	0	0	0	0
ENST00000452553	0	0	0	0
ENST00000424953	0	0	0	0
ENST00000436262	0	0	0	0
ENST00000415549	0	0	0	0
ENST00000629446	0	0	0.080949	0
ENST00000442876	0	0.12164	0.014576	0.049032
ENST00000411417	0	0	0	0
ENST00000612390	0	0	0	0
ENST00000416017	0	0	0	0
ENST00000620678	0	0	0	0
ENST00000608748	0	0	0	0
ENST00000438619	0	0	0	0
ENST00000565735	0	0	0	0
ENST00000446238	0	0	0	0
ENST00000427892	0	0	0	0
ENST00000433521	0.009071	0.00831	0.02793	0.013908
ENST00000635455	0	0	0	0
ENST00000436121	0	0	0	0
ENST00000434540	0	0	0	0.042345
ENST00000608243	0	0	0	0
ENST00000427806	0	0	0	0
ENST00000454305	0	0.413814	1.00952	0.306355
ENST00000436206	0	0	0	0
ENST00000421331	0.351362	0.546221	0.206397	0.533517
ENST00000608684	0	0.05608	0	0
ENST00000436742	0	0	0.010428	0
ENST00000413519	0	0	0	0
ENST00000415629	0	0	0	0
ENST00000635706	0	0	0	0
ENST00000567886	0	0	0	0
ENST00000458146	0	0	0	0.024649
ENST00000437080	0	0	0.033745	0
ENST00000418041	0	0	0	0
ENST00000443104	0	0	0	0
ENST00000443565	0	0	0	0
ENST00000439024	0.00872	0.120332	0.062095	0.172079
ENST00000443939	0	0	0	0
ENST00000430748	0	0	0.11348	0.190085
ENST00000420549	0	0	0	0
ENST00000452901	0	0	0	0
ENST00000419658	0	0	0	0
ENST00000452834	0.001731	0.042271	0.001816	0.000373
ENST00000421931	0	0	0	0
ENST00000446227	0	0	0	0
ENST00000417975	0.002092	0	0	0.002148
ENST00000457273	0.011731	0.111709	0.010438	0.01679
ENST00000417565	0	0	0	0
ENST00000413975	0	0	0	0
ENST00000419733	0	0	0	0
ENST00000439186	0	0.023229	0	0
ENST00000455929	0.008533	0.284237	0.369497	0.355572
ENST00000605506	0	2.89421	0	0
ENST00000370624	0.006182	0.006004	0	0.016899
ENST00000624216	0	0.034131	0.15437	0.023087
ENST00000427819	0.041343	0.135407	0.040359	0.043574
ENST00000426125	0.026857	0	0	0
ENST00000610230	0	0	0	0
ENST00000488557	0	0	0	0
ENST00000498304	0	0	0	0
ENST00000467530	0.042856	0.051241	0.067636	0
ENST00000472448	0.030189	0.072042	0.052937	0.059843
ENST00000467666	0.050033	0.239877	0.313931	0.133505
ENST00000609367	0	0	0	0
ENST00000426794	0	0	0	0
ENST00000456587	0	0	0	0
ENST00000565575	0	0.060982	0	0
ENST00000585888	1.117	1.61095	1.0815	0.839736
ENST00000469312	0	0.051454	0	0
ENST00000490006	0	0	0	0
ENST00000471417	0	0	0	0
ENST00000461990	0	0	0	0.022931
ENST00000590653	0	0	0	0
ENST00000476432	0	0	0	0
ENST00000467438	0	0	0	0
ENST00000619924	0	0	0	0
ENST00000484933	0.119019	0	0.018512	0
ENST00000589455	0	0	0	0
ENST00000587165	0	0	0	0
ENST00000452509	0	0	0	0
ENST00000623157	0	0	0	0
ENST00000437598	0	0	0	0
ENST00000458097	0.039077	0	0.028321	0
ENST00000425750	0	0	0	0
ENST00000437128	0	0	0	0
ENST00000443562	0.282037	0.198085	0.14241	0.047472
ENST00000415584	0	0.04792	0	0
ENST00000526694	0	0.140647	0.049379	0
ENST00000528692	0.071913	0.138299	0	0.076049
ENST00000429074	0.019962	0.040271	0.025365	0
ENST00000432395	0	0.021901	0.071318	0
ENST00000609194	0	0	0	0
ENST00000608671	0	0	0	0
ENST00000435832	0	0	0	0
ENST00000635581	0.132429	0.318423	0.962105	0.26015
ENST00000634619	0	0.213204	0.213638	0.290386
ENST00000435649	0	0.083876	0.051802	0.0748
ENST00000455680	0.016214	0	0	0
ENST00000606660	0.09558	0.183965	0.331646	0.164035
ENST00000635959	0	0.172524	0	0.002874
ENST00000443802	0.545121	1.04271	2.61018	0.638918
ENST00000636917	0.022585	0.077187	0.057938	0.062068
ENST00000637260	0	0	0	0
ENST00000425185	0	0.007576	0.013614	0.03602
ENST00000606898	0	0	0	0
ENST00000609675	0	0.034263	0	0.009423
ENST00000413606	0.135378	0.57988	0.900546	0.031769
ENST00000602488	0.03934	0.053912	0.036501	0.011751
ENST00000457025	0.109935	0	0	0
ENST00000446528	0.253353	0.402204	0.147277	0.10944
ENST00000451302	0.000208	0.010571	0.027502	0
ENST00000415150	0	0	0	0
ENST00000455474	0	0	0	0
ENST00000447577	0	0	0	0
ENST00000442860	0	0	0.516526	0.170727
ENST00000414430	0.284357	0.699462	0	0
ENST00000429859	0	0.100992	0	0
ENST00000427669	0	0.151366	0.097037	0.038304
ENST00000424517	0	0.017058	0	0
ENST00000450843	0.052482	0.330532	0.192219	0.023286
ENST00000440778	0	0	0	0
ENST00000421202	0.178043	0.676884	0.008524	0.018564
ENST00000436200	0	0	0	0
ENST00000432741	0	0	0.185663	0
ENST00000411670	0	0	0	0
ENST00000452347	0.365736	1.00694	0.101468	0.086099
ENST00000438777	0	0	0.089628	0.031819
ENST00000449305	0	0	0.126466	0.023026
ENST00000457387	0.090353	0.617981	0.544985	0.260299
ENST00000445076	0	0.304754	0.440849	0
ENST00000431770	0.988893	0.467444	1.204	1.56065
ENST00000427243	0.521096	0.443787	1.69745	0.973439
ENST00000417401	0	0	0.020618	0.024124
ENST00000412628	0	0	0	0.144104
ENST00000446684	0.335671	0.515389	1.15461	0.726243
ENST00000433544	0.281559	0.224676	0.126518	0.271981
ENST00000565336	0	0	0	0
ENST00000439455	0	0	0	0
ENST00000413103	0	0	0	0
ENST00000418242	0	0	0	0
ENST00000414039	0	0	0	0
ENST00000413541	0.022961	0.010798	0	0
ENST00000452846	0.634114	0.728286	0.972668	0.714215
ENST00000438509	0.027908	0.347079	0.476229	0.078315
ENST00000456582	0.251143	0.396303	0.389821	0.076637
ENST00000451611	0.059499	0.085481	0.094813	0.044469
ENST00000434207	0.303338	0.125739	0.056231	0.016518
ENST00000421762	0.261054	0.108149	0.096002	0.080527
ENST00000419846	0	0	0	0
ENST00000624604	0	0.154551	0.048132	0.075684
ENST00000444665	0	0	0	0
ENST00000630835	0	0	0	0
ENST00000598739	0	0	0	0
ENST00000624135	0.165842	0.022283	0.039512	0
ENST00000623609	0	0	0	0
ENST00000423410	0	0	0	0
ENST00000438093	0	0	0	0
ENST00000426881	0	0	0	0
ENST00000427695	0	0.040872	0	0
ENST00000424943	0.009047	0.025526	0	0.008845
ENST00000440116	0.060348	0	0	0
ENST00000456933	0	0	0	0
ENST00000411798	0	0	0	0
ENST00000603401	0	0	0	0
ENST00000442558	0	0	0	0
ENST00000593954	0	0	0	0
ENST00000634962	0	0	0	0
ENST00000413825	0	0	0	0
ENST00000609411	0	0	0	0
ENST00000624750	0	0	0	0
ENST00000595613	0	0	0	0
ENST00000623830	0	0	0	0
ENST00000625774	0	0	0	0
ENST00000627733	0	0	0	0
ENST00000595188	0	0	0	0
ENST00000451675	0	0	0	0
ENST00000623085	0	0	0	0
ENST00000623349	0	0	0	0
ENST00000598129	0	0	0	0
ENST00000598612	0	0	0	0
ENST00000412513	0	0	0	0
ENST00000631091	0	0	0	0
ENST00000435311	0	0	0	0
ENST00000422980	0	0	0	0
ENST00000629811	0	0	0	0
ENST00000630798	0	0	0.028706	0.755077
ENST00000424982	0.020511	0.045207	0.055354	0.250268
ENST00000431362	0	0	0	0
ENST00000422259	0	0	0	0.024328
ENST00000602672	0	0	0.023889	0.281511
ENST00000561881	0	0	0.018372	0
ENST00000634594	0	0.018832	0.177312	0.02518
ENST00000424528	0	0.006902	0.446685	4.11929
ENST00000413670	0.005914	0.0201	0	0
ENST00000602852	0	0	0	0.051233
ENST00000602984	0	0	0	0
ENST00000580305	0	0	0	0
ENST00000385223	0	0	0	0
ENST00000418344	0	0.001472	0	0.004373
ENST00000623685	0	0	0	0
ENST00000425113	0.057233	0.027643	0.066499	0.394398
ENST00000634316	0	0	0	0.043805
ENST00000635551	0	0	0	0
ENST00000438829	0	0	0	0.002757
ENST00000454219	0.885525	0.333747	0.235854	0.066348
ENST00000432294	0	0	0	0
ENST00000421185	0.431234	0.479446	1.61268	0.763069
ENST00000446055	0	0	0	0
ENST00000432210	0.126302	0.211712	0.193086	0.143936
ENST00000416343	0	0	0	0
ENST00000609247	1.66894	1.85346	2.12982	3.32909
ENST00000414686	0	0.06987	0.030973	0.036317
ENST00000453011	0	0	2.24724	0
ENST00000446527	0.315248	0.444927	0.211976	0.111285
ENST00000416329	0	0.011457	0.005635	0
ENST00000454721	0	0	0	0
ENST00000449473	0	0	0	0
ENST00000451213	0.01173	0.166594	0.136843	0.006579
ENST00000432195	0.060672	0.259194	0.837692	0.603926
ENST00000561748	0	0	0	0
ENST00000454466	0	0	0	0
ENST00000439146	0	0	0	0
ENST00000444327	0	0	0	0
ENST00000415532	0	0	0	0
ENST00000635702	0.00345	0.005322	0	0.005735
ENST00000447916	0	0	0	0
ENST00000414418	0	0	0	0
ENST00000414923	0	0	0	0
ENST00000444810	0	0	0.011568	0
ENST00000447322	0	0.041927	0	0
ENST00000600656	0	0	0	0
ENST00000597635	0	0	0	0
ENST00000595309	0	0	0	0
ENST00000624898	0	0	0	0
ENST00000624083	0	0	0	0
ENST00000624780	0	0	0	0
ENST00000420901	0	0	0	0
ENST00000597752	0	0	0	0
ENST00000624489	0	0	0	0
ENST00000623447	0	0	0	0
ENST00000594455	0	0	0	0
ENST00000624229	0	0	0	0
ENST00000435253	0	0	0	0
ENST00000623043	0	0	0	0
ENST00000610126	0	0	0	0
ENST00000446693	0	0	0	0
ENST00000635713	0	0	0	0
ENST00000429080	0	0	0	0
ENST00000417385	0	0	0	0
ENST00000635342	0	0	0	0
ENST00000635636	0	0	0	0
ENST00000635570	0	0	0	0
ENST00000634380	0	0	0	0
ENST00000635102	0	0	0	0
ENST00000634776	0	0	0	0
ENST00000635395	0	0	0	0
ENST00000635233	0	0	0	0
ENST00000634740	0	0	0	0
ENST00000634868	0	0	0	0
ENST00000437803	0	0	0	0
ENST00000429608	0	0	0	0
ENST00000415910	0	0	0	0
ENST00000438318	0	0	0	0
ENST00000419428	0	0	0	0
ENST00000634635	0	0	0	0
ENST00000635340	0	0	0	0
ENST00000634935	0	0	0	0
ENST00000451023	0	0	0	0
ENST00000564063	0	0	1.33542	0
ENST00000622910	0	0	0	0
ENST00000438965	0.005023	0	0	0
ENST00000419814	0.005023	0	0	0
ENST00000437400	0	0	0	0
ENST00000369989	0	0	0	0
ENST00000417241	0	0	0	0.035365
ENST00000608574	0	0	0	0
ENST00000602755	0	407.32	0	3.6e-05
ENST00000526411	0.318755	0.096129	0.214258	0.835434
ENST00000436416	0	0	0	0
ENST00000369843	1.23145	2.16595	1.39228	1.98659
ENST00000562538	1.35617	2.40844	1.8836	0.57903
ENST00000431955	0	0.029012	0.012861	0.03016
ENST00000453347	0.084492	0	0	0
ENST00000415166	0	0	0	0
ENST00000565955	0	0	0	0
ENST00000554749	0.066486	0.030166	0	0.903872
ENST00000554808	0	0	0.02336	0.021044
ENST00000430098	0	0	0	0
ENST00000443008	0.091001	0	0	0.558212
ENST00000418579	0	0	0	0
ENST00000440688	0	0	0	0.191881
ENST00000455967	0.104503	0.062678	0.092593	0.181555
ENST00000449169	0.223979	0.241895	0.211439	0.131375
ENST00000626572	0.002533	0.040398	0.019185	0.029214
ENST00000590413	0.05778	0.019039	0	0.006647
ENST00000457535	0.204412	0	0	0.322797
ENST00000625451	0	0	0	0
ENST00000608067	0	0.14609	0	0
ENST00000608486	0	0	0	0
ENST00000598454	0	0	0.120469	0
ENST00000609709	0	0	0.234765	0
ENST00000610148	0	0	0	0
ENST00000587691	0	0.032608	0.02711	0.115364
ENST00000622324	0	0	0	0
ENST00000608499	0.005905	0	0	0
ENST00000609244	0	0	0	0
ENST00000630179	0	0	0	0
ENST00000612551	0.161307	0.14132	0.217552	0.261329
ENST00000608253	0	0	0.085577	0
ENST00000609512	0	0	0	0
ENST00000608602	0.152646	0	0	0.025754
ENST00000590826	0	0	0	0
ENST00000631307	0.196909	0.122831	0.297363	0.179483
ENST00000609653	0	0	0	0
ENST00000585330	0	0	0	0
ENST00000608111	0.072915	0	0	0.193198
ENST00000609245	0	0	0	0
ENST00000608152	0	0	0	0
ENST00000608719	0	0	0	0
ENST00000444238	0	0	0	0
ENST00000608635	0	0	0	0
ENST00000608077	0	0	0	0
ENST00000631010	0	0	0	0
ENST00000616223	0	0	0	0
ENST00000599202	0	0	0	0.058125
ENST00000598158	0	0	0	0
ENST00000630508	0	0	0	0
ENST00000596890	0	0	0	0
ENST00000626531	0	0	0.018136	0
ENST00000626643	0	0	0	0
ENST00000630455	0	0.151503	0.038245	0.036413
ENST00000627648	0	0.04611	0	0
ENST00000627735	0	0	0.008289	0
ENST00000625992	0.029253	0	0	0
ENST00000628225	0	0	0.004683	0
ENST00000629288	0	0	0	0
ENST00000585433	0	0	0	0
ENST00000630298	0	0	0	0
ENST00000598350	0	0	0	0
ENST00000629484	0	0	0	0
ENST00000630488	0	0	0	0
ENST00000626261	0	0.053296	0	0.220953
ENST00000597455	0	0	0	0.015136
ENST00000625584	0.089917	0	0	0
ENST00000609909	0.64959	0	0	0
ENST00000481350	0.025854	0.168597	0	0
ENST00000634812	0	0	0	0
ENST00000457402	0.058307	0	0.02652	0.005183
ENST00000566942	0	0	0	0
ENST00000562952	0.146738	0.215614	0.174228	0.393879
ENST00000440689	0.084558	0.09831	0.092536	0.228125
ENST00000609118	1.64161	1.57331	3.72543	2.99815
ENST00000607951	0	0	0	0
ENST00000610049	0.32153	0.481631	0.235563	0.320399
ENST00000426321	0	0	0	0
ENST00000564771	0.121723	0.448822	0	0.228471
ENST00000445680	0.632586	0.06558	0.108041	0
ENST00000416099	0	0	0	0
ENST00000450155	0	0.739356	0.421197	0.628545
ENST00000441004	0	0	0	0
ENST00000453988	2.65214	0.01089	0	0
ENST00000430373	0.191199	0.277729	0.758558	0.205148
ENST00000524935	0	0	0	0
ENST00000439736	0.002651	0	0.146729	0.011666
ENST00000441125	0	0	0	0
ENST00000427471	0	0	0.12477	0.0209
ENST00000419258	0	0	0	0
ENST00000442751	0	0	0.048316	0.22436
ENST00000428461	0	0	0.088037	0.010604
ENST00000438293	0	0	0.006774	0.002542
ENST00000427290	0	0	0	0
ENST00000608357	0.038762	0	0.084037	0
ENST00000421943	0.491681	1.09098	0.168178	0.24387
ENST00000566195	0.00907	0.048979	0	0
ENST00000433505	2.38399	0	0	0
ENST00000401018	0.84248	0.15924	0.030773	0.060286
ENST00000449572	0	0	0	0
ENST00000456651	0.084919	0.094851	0	0.113276
ENST00000422022	0	0.000159	0.143078	0
ENST00000416193	2.03333	0.397088	0.501878	0
ENST00000435800	0.139742	0.314672	0.305969	0.087982
ENST00000428411	0.073199	0.139737	0.352619	0.454065
ENST00000420168	2.72355	0.992764	0.905092	0
ENST00000627431	0	0.011599	0	0
ENST00000413231	0	0	0	0
ENST00000451149	0.20739	0.260457	0.076167	0.205838
ENST00000421157	0.640142	1.29588	0.797485	0.514074
ENST00000429398	0	0	0	0
ENST00000418238	0.003544	0.080953	0.06008	0.075381
ENST00000448199	0	0	0	0
ENST00000419536	0.038138	0.20319	0.097323	0.349091
ENST00000441071	0	0	0.011081	0
ENST00000427953	0	0	0.062581	0
ENST00000450706	0.040228	0.001993	0.052554	0
ENST00000426237	0	0	0.008213	0.017096
ENST00000632517	1.17724	0.055313	0	0
ENST00000420156	0	0	0	0
ENST00000448680	0	0	0	0.200938
ENST00000425449	0	0.006526	0	0.059666
ENST00000634255	0	0	0	0.04679
ENST00000438885	0	0	0	0
ENST00000453128	0	0.03325	0	0.063832
ENST00000426515	0	0.007181	0	0
ENST00000608511	0.666449	0.905132	0.601693	1.14618
ENST00000493908	0	0.298179	0	0.116484
ENST00000369491	0.112878	0.442257	0	0.12467
ENST00000369492	0.341434	1.4786	0.251445	1.29471
ENST00000423907	0	0	0	0
ENST00000443219	0.017195	0	0.055683	0.016006
ENST00000437308	0	0.068687	0	0
ENST00000430316	0	0	0	0
ENST00000434879	0	0.065834	0.036521	0
ENST00000430107	0.003808	0	0	0
ENST00000449303	0	0	0.057367	0
ENST00000456414	0.13079	0.224257	0.15101	0.174546
ENST00000624685	0	0	0	0
ENST00000610171	0	0.183615	0	0.238387
ENST00000445523	0.129026	0.205365	0.14583	0.132265
ENST00000421254	0	0	0	0
ENST00000442182	0	0	0	0
ENST00000604156	0	0	0	0
ENST00000623435	0.016705	0	0	0
ENST00000440801	0	0	0	0
ENST00000425010	0.029709	0	0	0
ENST00000456126	0	0	0	0
ENST00000439394	0	0.138327	0	0
ENST00000449439	0	0	0	0.057505
ENST00000423984	0.092516	0.222353	0.140571	0.088406
ENST00000425884	0.51521	1.77943	1.73732	0.550814
ENST00000440150	0.332743	2.05128	0.311006	0.191595
ENST00000457043	0.220402	0	0.510203	0.397536
ENST00000413531	0	0.153196	0.024798	0.001971
ENST00000418015	0.152997	0.1111	0.047808	0.015938
ENST00000445565	0.231119	0.491588	0.25906	0.255854
ENST00000457719	0.299784	0.571326	0.017464	0.0199
ENST00000420059	0.094975	0.075929	0	0
ENST00000457683	0	0	0	0
ENST00000419144	0	0	0	0
ENST00000562811	0	0	0.053921	0
ENST00000566949	0	0	0.221747	0.089657
ENST00000608123	0.089362	0.080765	0.087324	0.020307
ENST00000621058	8.70222	2.85854	1.57907	4.64342
ENST00000615424	0.226684	0.049896	0	0.092138
ENST00000614062	0.009718	0.162278	0.034722	0.02477
ENST00000617702	0.91398	0.974318	1.15281	1.55667
ENST00000613486	1.97686	0.720473	1.20752	0.17543
ENST00000426275	0	0	0	0
ENST00000457996	0.015242	0.048064	0.056609	0.066427
ENST00000427872	0	0.103507	0.021036	0.062951
ENST00000437515	0.169127	0.72075	0.369873	0.252034
ENST00000429055	0	0.000144	0	0.000257
ENST00000417218	0.01765	0.098849	0.057998	0.069139
ENST00000445260	0	0.036407	0	0.026547
ENST00000437523	0	0	0	0
ENST00000609485	0	0	0	0
ENST00000450546	0.029253	0	0	0
ENST00000456469	0.106694	0.139104	0.00849	0.019909
ENST00000443018	0.19939	0.181047	0.146686	0.222099
ENST00000424684	0.273195	0.497007	0.25261	0.515736
ENST00000415338	0.004694	0.011684	0.01308	0.027199
ENST00000609879	0	2.55133	2.0904	0
ENST00000444624	0	0.078455	0.021036	0.012141
ENST00000452399	0.122169	0.251575	0.103202	0.051401
ENST00000457390	0	0	0	0.470355
ENST00000294715	0.301047	1.57019	0.836585	0
ENST00000420597	0.198544	1.15627	0.035807	0.340635
ENST00000455105	0.517524	0.143273	0.494992	0.459881
ENST00000617368	0.002572	0.132833	0	0.016783
ENST00000615763	0	0.007247	0.066758	0.059612
ENST00000441760	0.16245	0.77987	0.363496	0.229103
ENST00000578899	0.012175	0.036757	0	0.326592
ENST00000621798	0.089004	0	0	0.157773
ENST00000621033	0.267873	0.605992	0	0.878171
ENST00000606004	0.095226	0.387024	0.161803	0.033797
ENST00000614510	0.025575	0.061827	0.138249	0.438695
ENST00000610324	0.67777	0.568038	0.357561	0.792461
ENST00000616993	0.018458	0.17407	0.061223	0.48405
ENST00000418192	0	0	0	0
ENST00000618589	0	0	0	0
ENST00000427732	0.181954	0.098964	0.322928	0.373754
ENST00000415065	0	0	0.023222	0.029864
ENST00000596355	0.962684	1.03579	0	0
ENST00000447686	0.081508	0.018472	0.791919	1.49743
ENST00000412239	0	0	0	0
ENST00000437797	0	0	0	0
ENST00000601726	0.058848	0.09758	0.711768	0.311966
ENST00000599626	0	0.061482	0.062298	0.048096
ENST00000599147	0	0	0.000476	0.001638
ENST00000595494	0	0	0	0
ENST00000595518	0	0	0	0.036565
ENST00000597144	0	0	0	0
ENST00000599469	0	0	0	0
ENST00000598354	0	0	0	0.013258
ENST00000598103	0	0	0	0
ENST00000600340	0	0	0	0
ENST00000630257	0	0	0	0.016724
ENST00000448561	0	0	0	0
ENST00000421764	0	0	0	0
ENST00000437207	0	0	0	0
ENST00000366105	0	0.573704	0.06505	0.58132
ENST00000616257	0	0	0	0
ENST00000610820	0.08435	0.07789	0.132246	0.561167
ENST00000611275	0.00029	0.025886	6.7e-05	0.04194
ENST00000619720	0	0	0	0
ENST00000612371	0.144257	0.067592	0	0
ENST00000452883	0	0.439461	0.114321	0.264102
ENST00000457465	0	0	0	0
ENST00000622359	0.012449	0.056516	0.020762	0.041345
ENST00000621489	0.004059	0	0	0
ENST00000425109	0	0	0	0
ENST00000455718	0	0	0	0
ENST00000440377	0.008193	0.035413	0.736041	0.940892
ENST00000607149	0.007071	0.019559	0.018076	0.050445
ENST00000606757	0	0	0	0
ENST00000606856	0.054661	0	0	0
ENST00000619867	0.090612	0.080657	0.077398	0.073759
ENST00000621316	0	0.042417	0	0
ENST00000431525	0	0	0	0
ENST00000612401	0	0	0	0
ENST00000622634	0	0	0.038847	0
ENST00000426504	0.011596	0	0	0
ENST00000401008	0.534846	0.626183	1.09656	0.555388
ENST00000616036	0	0.005417	0.061784	0
ENST00000610161	0	0	0	0
ENST00000614663	0.441977	0.515505	1.08493	0.261741
ENST00000617309	0.228609	1.07964	0.82464	0.584702
ENST00000599640	1.90875	0.02459	0.018004	0.025896
ENST00000628902	0.0032	0	0	0
ENST00000611286	0	0	0	0
ENST00000614606	0	0	0	0
ENST00000482381	0.131569	0	0	0
ENST00000596091	0.122064	0	0	0
ENST00000599387	0	0	0	0
ENST00000611452	0	0	0	0
ENST00000629702	0	0	0.007932	0
ENST00000596220	0	0	0	0
ENST00000464343	0.006573	0	0	0
ENST00000628063	0.025282	0.00111	0.009838	0
ENST00000634551	0.201741	0	0	0
ENST00000496508	0.029754	0	0	0
ENST00000611617	0	0	0	0
ENST00000622642	0	0	0	0
ENST00000620213	0	0	0	0
ENST00000616018	0	0	0	0
ENST00000594189	0.572452	0	0	0
ENST00000432038	0	0	0	0
ENST00000411978	0	0	0	0
ENST00000594699	0.000449	0	0	0
ENST00000595367	0	0	0	0
ENST00000597931	0	0	0	0
ENST00000599864	0.059413	0	0	0
ENST00000595668	0	0	0	0
ENST00000618809	0.368102	0.01784	0	0.037091
ENST00000608244	0	0	0	0
ENST00000428035	0	0.293494	0.097134	0.051639
ENST00000445201	0.046882	0.008477	0	0.06396
ENST00000434245	0.067848	0	0	0
ENST00000427169	0.232171	0.045302	0.021672	0.012705
ENST00000452996	0.365148	0.376191	0.223958	0.045772
ENST00000609678	0.056388	0	0	0.035653
ENST00000622328	0.064395	0.15585	0.059866	0.187888
ENST00000613452	0	0.088761	0.062078	0.11851
ENST00000614292	0.085094	0	0.894171	1.20082
ENST00000440862	0.13931	0.366051	0.1531	0.664887
ENST00000634549	0.084111	0.112992	0.216345	0.142336
ENST00000634638	0	0	0	0.204745
ENST00000635493	0	0	0	0
ENST00000635587	0.158144	0.166825	0.020048	0
ENST00000426101	0	0.24203	0.156347	0.144993
ENST00000445243	0.520103	0	0.081658	0
ENST00000531288	0	0	0	0
ENST00000532137	0.209047	0.207052	0.126049	0.838982
ENST00000466343	0.283511	0.761418	0.348816	1.10702
ENST00000611769	0.002181	0.019022	0.0463	0.031679
ENST00000619653	6.28254	7.24547	0	0
ENST00000612135	0.233444	0.11284	0.129835	0.084603
ENST00000610119	0	0	0	0
ENST00000429388	0.075655	0	0	0
ENST00000622695	0.112232	0	0.129169	0.111852
ENST00000620190	4.2128	3.14906	2.06664	4.53753
ENST00000610578	0.028152	0.059109	0.054228	0.110716
ENST00000621156	1.35602	0.66547	0.337193	0.081986
ENST00000439719	0.72674	0	0	0.103082
ENST00000435115	0.018181	0.047881	0.198311	0.009889
ENST00000430442	0.085591	0.172448	0.145739	0.069269
ENST00000622079	0.016066	0	0	0
ENST00000610297	0.613009	0.075032	0.113844	0.059488
ENST00000617712	1.06362	0.606139	0.247585	0.973001
ENST00000428289	0.032828	0.021598	0.013081	0.214398
ENST00000564237	0	0.018124	0.180385	0
ENST00000608318	0.301858	0.544522	0.574657	3.56091
ENST00000577853	0	1.65141	0	0.75395
ENST00000611044	0.268659	0.228606	0.216004	0.140238
ENST00000416894	0.332499	0.774698	0.509575	0.437198
ENST00000442435	0.587754	1.11979	0.538453	1.35643
ENST00000615012	0	0	0	0
ENST00000617352	0	0	0	0
ENST00000369035	0	0	0	0
ENST00000560481	1.0375	0.490451	0.321755	0
ENST00000561111	0.500027	1.1305	0.609823	0.953626
ENST00000412838	0.11602	0.10872	0.122124	0.067802
ENST00000563624	0	0	0	0
ENST00000494138	0.575239	0	0.172668	0
ENST00000447795	1.29966	1.00411	1.04893	1.76381
ENST00000609583	0	0	0	0
ENST00000422153	0.03481	0.163697	0	0.102104
ENST00000455503	0.674849	0.43655	0.551896	0.97641
ENST00000434112	0.89456	1.83787	2.61658	3.66938
ENST00000504583	0.247198	0.150726	0.073183	0.34051
ENST00000457548	0	0.148407	0.258991	0.603352
ENST00000601684	0	0.052423	0	0.027378
ENST00000512280	0.485535	0.534754	0.643645	1.03457
ENST00000420382	0	0	0	0
ENST00000596133	0	0	0.239173	0
ENST00000533481	0.204355	0.251742	0.321316	0.936865
ENST00000389897	0.390521	0.184554	0.468911	1.46164
ENST00000601909	0	0	0	0
ENST00000434182	1.77124	0.229549	0.032254	0.184749
ENST00000432386	0.087007	0.005724	0.004833	0.002538
ENST00000429230	0	0	0	0
ENST00000593011	0	0	0	0
ENST00000420707	0	0	0	0
ENST00000382265	0	0	0	0
ENST00000392688	0	0	0	0
ENST00000629331	0	0	0	0
ENST00000445097	0	0	0	0
ENST00000630125	0	0	0	0
ENST00000628475	0	0	0	0
ENST00000411804	0	0	0	0
ENST00000429352	0	0	0	0
ENST00000444515	0	0	0	0
ENST00000419578	0	0	0	0
ENST00000427145	0	0	0	0
ENST00000420695	0.257655	0.112278	0.057926	0
ENST00000497086	0	0	0.129762	0.061991
ENST00000484413	0.018223	0	0	0
ENST00000472233	0	0	0.001602	0
ENST00000607839	0	0.44651	0	0
ENST00000469931	0.292668	0.116416	0.133971	0.168953
ENST00000453778	0	0	0.17346	0
ENST00000434575	1.50305	1.22796	0.670758	0.787105
ENST00000633140	0	0	0	0
ENST00000608147	0	0	0	0
ENST00000608236	0.545814	1.00632	0	0
ENST00000424435	0	0	0	0
ENST00000607963	0	0	0	0
ENST00000441613	0.346162	0.358495	0.869168	0.233911
ENST00000421866	0.723641	1.09734	1.34108	5.29638
ENST00000604546	0.195296	0	0	0.194245
ENST00000605085	0	0	0	0
ENST00000452962	0.87051	0.620984	1.18798	0.37502
ENST00000447623	0.07618	0	0	0
ENST00000607575	0	0	0	0
ENST00000454348	0	0	0	0
ENST00000436772	0	0	0	0
ENST00000453136	0	0.152359	0.01745	0.043718
ENST00000422665	0	0.057743	0.011351	0
ENST00000430312	0.196928	0.219697	0.016862	0
ENST00000455788	0.071802	0.021395	0	0.035722
ENST00000446880	0	0	0	0
ENST00000543656	0	0	0	0
ENST00000443642	0	0	0	0
ENST00000450199	0.216515	1.51878	0.187971	0
ENST00000458371	0.261002	0.45354	0.247266	0.667094
ENST00000456633	1.06893	0	0.402246	2.26733
ENST00000452809	0	0	0	0
ENST00000456382	0.158674	0.140601	0.407988	0.082903
ENST00000432858	0	0	0	0
ENST00000610146	0.645801	0.214086	0.525349	0.207141
ENST00000415726	0	0.029229	0.087762	0.34396
ENST00000451362	0.033465	0.004196	0.007453	0.012772
ENST00000441085	0.296551	0.086861	0	0
ENST00000452465	0	0	0.374163	0.559145
ENST00000564032	0	0	0.002555	0
ENST00000609800	0	0.149563	0.037995	0
ENST00000606343	0.049352	0	0.06717	0.147484
ENST00000605886	0	0	0	0
ENST00000448869	0.5896	0.562814	0.26132	0.449145
ENST00000441272	0.488465	0.602181	0	0.119871
ENST00000428641	0	0	0	0.002263
ENST00000457239	0	0	0	0
ENST00000449345	0	0	0	0
ENST00000607010	0	0	0	0
ENST00000434098	0	0	0	0
ENST00000453692	0	0	0	0
ENST00000419415	0.96837	2.53274	1.10876	1.43041
ENST00000635685	0	0	0	0
ENST00000442358	0	0	0	0
ENST00000414848	0	0	0	0
ENST00000415019	0	0	0.000849	0
ENST00000419738	0	0	0	0
ENST00000426251	0	0	0	0
ENST00000415675	0.269183	0.303793	0.548481	11.5998
ENST00000609696	0	0.000326	0.000216	0.030546
ENST00000431862	0	0	0	0
ENST00000412932	0	0	0	0
ENST00000608430	0	0	0	0
ENST00000623350	0	0.050849	0	0
ENST00000443364	0.003216	0	0	0
ENST00000423943	0	0	0	0
ENST00000635112	0	0	0	0
ENST00000562313	0.013531	0.076357	0.116063	0.263533
ENST00000435580	0	0.082984	0.010955	0.112832
ENST00000418602	0.931628	0.51012	0.218555	1.40429
ENST00000442130	0.684619	0.466705	0.502077	0.697233
ENST00000446952	0	0	0	0
ENST00000598917	0	0	0	0
ENST00000443928	0.05227	0	0	0
ENST00000588034	0	0	0	0
ENST00000621431	0	0.257026	0	0
ENST00000627180	0	0	0	0
ENST00000630436	0.033042	0.017347	0.013457	0.015779
ENST00000627996	0	0	0	0
ENST00000626085	0	0	0	0
ENST00000627799	0	0	0	0
ENST00000628340	0.497521	0.011635	0.003549	0.265273
ENST00000427339	0	0	0	0
ENST00000356006	0.181832	0.026604	0.02808	0.006541
ENST00000447167	0	0	0.014144	0
ENST00000420498	1.71233	2.15521	0.507846	2.48405
ENST00000636161	0.137227	0.305289	0.229104	0.065196
ENST00000637155	0.067246	0.070127	0.099875	0.075395
ENST00000636824	0.015928	0.023966	0.006972	0.086745
ENST00000537821	0	0	0	0
ENST00000419446	0	0	0	0
ENST00000453111	0	0	0	0
ENST00000626340	0.058089	0	0	0
ENST00000431097	0	0.203839	0	0.00777
ENST00000430905	0	0	0	0
ENST00000447899	0.189941	1.06371	0.203007	0.407877
ENST00000563991	0	0.021665	0	0.022522
ENST00000609669	0.000823	0	0	0.013356
ENST00000415437	0.009466	0	0.02368	0
ENST00000451759	0	0.025005	0.026495	0.003502
ENST00000449680	0.020928	0	0	0.00576
ENST00000427213	0	0	0.153097	0.129801
ENST00000429865	0.048453	0.050567	0.032458	0.050396
ENST00000528019	0	0	0	0
ENST00000528689	0.03048	0	0	0
ENST00000439699	0.078986	0.331747	0.083082	0.040481
ENST00000528818	0.225763	0.455042	0.365049	0.23671
ENST00000526176	0.103982	0.06639	0.434177	0.214651
ENST00000416401	0	0	0.033383	0
ENST00000602747	0.276543	0	0	0
ENST00000421530	0.136448	0.118859	0.203278	0.363444
ENST00000607752	0.186531	0	0	1.33453
ENST00000457106	0	0	0	0
ENST00000441773	0	0	0	0
ENST00000426178	0	0	0	0
ENST00000416424	0	0	0	0
ENST00000421273	0	0	0	0
ENST00000438275	0	0	0	0
ENST00000452283	0	0	0	0
ENST00000418925	0	0	0	0
ENST00000415000	0	0	0	0
ENST00000454251	0	0	0	0
ENST00000452618	0.050998	0.121075	0.132704	0.236259
ENST00000608512	0.034189	0	0	0
ENST00000423121	0.604042	0.614697	0.927162	0.667557
ENST00000626270	0.5817	1.54199	0.688958	0.691865
ENST00000455257	0	0.042076	0.102758	0
ENST00000366136	0.101821	0.09787	0.122459	0.251621
ENST00000451784	0.231003	0.360751	0.26497	0.664042
ENST00000425271	0	0	0	0
ENST00000448643	0	0	0	0
ENST00000426519	0	0	0	0
ENST00000417644	0	0	0	0
ENST00000426709	0	0	0	0
ENST00000428030	0	0	0	0
ENST00000457941	0	0	0	0
ENST00000446687	0	0	0	0
ENST00000606967	0	0	0.175181	0
ENST00000607611	0	0	0.193155	0
ENST00000417969	0	0.06595	0	0
ENST00000610044	0	0	0	0
ENST00000451992	0	0	0	0
ENST00000451545	0.122714	0.228567	0.205224	0.118111
ENST00000441851	0.576802	0.640985	0.285416	0.095708
ENST00000636459	0.010671	0.014079	0	0
ENST00000422253	0	0	0	0
ENST00000422548	0	0	0	0
ENST00000457405	0	0	0	0
ENST00000420691	0	0	0	0
ENST00000366408	0.090401	0.022209	0	0.000989
ENST00000415637	0	0.020635	0.054885	0
ENST00000432081	0	0	0	0
ENST00000392097	0	0.588395	0.794088	0
ENST00000454271	0	0	0	0
ENST00000440321	0	0	0	0
ENST00000439184	0	0	0	0
ENST00000440404	0	0.008044	0	0
ENST00000451439	0	0	0	0
ENST00000416416	0	0.010594	0.01662	0.000312
ENST00000446102	0.023914	0	0.003863	0
ENST00000456083	0.822445	0.92596	0.763109	0.797017
ENST00000421020	0	0.010246	0.129433	0.09831
ENST00000426090	0	0	0	0
ENST00000413005	0	0	0	0.002239
ENST00000606154	0.032257	0	0.010163	0
ENST00000422841	0	0	0	0
ENST00000445909	0	0	0	0
ENST00000445290	0	0	0	0
ENST00000455124	0.26586	0.906464	0.302548	0.073366
ENST00000450800	0	0	0.030355	0.095284
ENST00000417354	0.006697	0.001835	0.001208	0.081655
ENST00000385214	0	0	0	0
ENST00000624123	0.030389	0	0	0
ENST00000432694	0	0	0	0
ENST00000452366	0	0	0	0
ENST00000436974	0.018061	0	0.009726	0
ENST00000367716	1.31424	2.28366	1.23575	0.446525
ENST00000437190	0.030057	0.035608	0.034911	0
ENST00000431459	0.080011	0.034279	0.030699	0.022797
ENST00000602767	0.31412	0	0.468367	0
ENST00000449289	0.077217	0.039119	0.020871	0
ENST00000414075	0.09042	0.918281	0.54284	0.267348
ENST00000448718	0.809064	2.02523	3.3797	0.398266
ENST00000436285	0.939351	0.310596	0.175991	0.21816
ENST00000456812	0.102134	0.026078	0.133302	0.153803
ENST00000452197	0	0.120269	0.269299	0
ENST00000450589	2.92248	3.60446	3.67632	0.299188
ENST00000412059	1.09433	1.08617	0.776855	0.263488
ENST00000431268	0.136358	0.438663	0.412984	0
ENST00000436656	0.265111	0.212291	0.191685	0.062715
ENST00000430245	0.324494	1.70748	0.927163	0.294976
ENST00000454813	0.015133	0.010396	0.005615	0
ENST00000422183	0.227836	0.108539	0.453216	0.346446
ENST00000422207	0.06739	0.028539	0.016552	0
ENST00000454068	0.248776	2.26542	0.097704	0.496496
ENST00000444470	0.063063	0.027484	0.058607	0.006617
ENST00000434796	0.006529	0.065203	0.012198	0
ENST00000449589	0.093329	0.323815	0.0477	0.125718
ENST00000451607	2.4328	1.01071	2.01974	0.289843
ENST00000422008	0.325395	0.977096	0.091014	0.207749
ENST00000442067	0.577294	0.089176	0.068529	0.005501
ENST00000455838	0.057233	0.01951	0.005538	0.137419
ENST00000416952	0.068667	0.080106	0.114291	0.001737
ENST00000432536	2.75854	2.61392	2.14534	1.524
ENST00000456293	0.131982	0.076387	0.019519	0
ENST00000443799	0.095983	0.323984	0.146467	0.037363
ENST00000421068	0.391932	0.247	0.292497	0.252699
ENST00000425771	0.042615	0.062423	0	0
ENST00000458220	0	0.003558	0.002446	0.129274
ENST00000421851	0.538223	0.815778	0.715895	0.756374
ENST00000424181	0.159862	0.261646	0.880534	0.394609
ENST00000426899	0	0	0	0
ENST00000419983	0	0	0	0
ENST00000454467	0	0	0	0
ENST00000430592	0	0	0	0
ENST00000414890	1.47954	0.751878	0.525315	1.11957
ENST00000452442	0	0	0	0.02546
ENST00000448686	0.000158	0	0.041513	0.046483
ENST00000412357	0	0	0	0
ENST00000569593	0	0	0	0.043156
ENST00000455447	0.039561	0.024335	0	0.312718
ENST00000457217	0.048222	0.01123	0.022977	0.239782
ENST00000426575	0	0.096097	0.031633	0.057931
ENST00000426030	0	0.064846	0.086569	0.019371
ENST00000456125	0.107615	0.421811	0.111852	1.54002
ENST00000451341	0	0	0	0
ENST00000438575	0	0	0	0
ENST00000458070	0	0	0	0
ENST00000427173	0	0	0.006237	0
ENST00000354921	0.00678	0.002091	0	0
ENST00000466953	0.248251	0.325971	0.046864	0
ENST00000464428	0.270852	0.047607	0.006555	0
ENST00000421505	0.383439	0.700914	0.772762	0.697609
ENST00000419458	0	0	0.004866	0
ENST00000452867	0	0	0	0
ENST00000367638	1.01017	0.712598	0.920536	0.856699
ENST00000521244	0.144268	1.10282	0.402453	0.403702
ENST00000608190	0	0	0	0
ENST00000608517	0	0.951076	0	0
ENST00000569644	0	0	0.003491	0.003699
ENST00000567150	0.026685	0	0.031449	0
ENST00000423879	0	0	0	0
ENST00000451471	0	0	0	0
ENST00000453051	0	0	0	5.1515
ENST00000415218	0	0	0	0
ENST00000442108	0	0	0.0497	0.094843
ENST00000610272	0.532243	0.190645	0.897587	0.823549
ENST00000567486	0	0	0	0
ENST00000567904	0.043082	0	0	0.098678
ENST00000566904	0	0.032738	0	0
ENST00000442621	0	0	0	0
ENST00000434447	0.072768	0.020301	0.0939	0.432304
ENST00000422858	0	0.259468	0.074934	0.331059
ENST00000358073	0	0	0.039665	0
ENST00000415647	1.47166	2.25985	1.63405	3.49758
ENST00000435023	0.092877	0	0.13668	0
ENST00000438428	0	0.073154	0	0
ENST00000456771	0	0.044063	0	0
ENST00000319701	0	0	0	0
ENST00000609720	0	0	0	0
ENST00000411509	0	0.004759	0	0
ENST00000428646	0	0	0	0
ENST00000412174	0	0	0	0.001164
ENST00000608183	0	0	0	0
ENST00000420760	0	0	0	0
ENST00000449842	0	0	0	0
ENST00000367563	0	0	0	0
ENST00000612603	0	0	0	0
ENST00000566297	0.269282	0	0	0.216094
ENST00000435492	0	0	0	0
ENST00000457852	0	0	0	0
ENST00000421703	0	0.027034	0.009362	0.009513
ENST00000432837	0	0	0	0
ENST00000624060	0	0.624967	1.94129	3.53447
ENST00000451829	0	0	0	0
ENST00000449525	0	0	0	0
ENST00000605589	0	0	0	0
ENST00000414377	0	0.645942	0.215856	0.568758
ENST00000566476	0	0	0	0
ENST00000623474	0	0	0	0
ENST00000609881	0	0	0	0.80235
ENST00000562817	0.361466	0.381879	0.065283	0.17956
ENST00000563533	0	0	0	0
ENST00000565520	0	0	0	0
ENST00000622958	0	0	0.006228	0
ENST00000609066	0	0.064048	0	0
ENST00000439633	0	0	0	0
ENST00000608417	0	0	0	0
ENST00000436955	0	0	0	0
ENST00000569292	0	0.007805	0.014763	0.014785
ENST00000428391	0.176513	0.271602	0.029438	0.104931
ENST00000622121	0	0.029455	0	0
ENST00000429768	0	0	0	0
ENST00000609032	0	0.044063	0	0
ENST00000608917	0	0.085242	0	0.051396
ENST00000458683	0	0	0	0
ENST00000444887	0	0	0	0
ENST00000427337	0	0	0.017156	0
ENST00000609113	0	0	0	0
ENST00000429725	0	0	0.006658	0
ENST00000614505	0	0.010493	0.014203	0
ENST00000569873	0	0	0	0
ENST00000426262	0	0	0	0
ENST00000432976	0	0	0	0
ENST00000414765	0	0	0	0
ENST00000445072	0	0	0	0
ENST00000419614	0	0	0	0
ENST00000450681	0	0	0	0
ENST00000452178	0	0	0	0
ENST00000436905	0	0	0	0.033862
ENST00000424735	0.094767	0.223125	0.019756	0.336178
ENST00000417409	0	0	0	0
ENST00000413356	0	0	0	0
ENST00000563320	0	0	0	0
ENST00000434983	0	0	0	0
ENST00000432083	0	0	0	0
ENST00000428569	0	0	0	0
ENST00000430776	0.007858	0	0	0
ENST00000434300	0	0	0	0
ENST00000457321	0	0	0	0
ENST00000451690	0	0	0	0.011184
ENST00000608166	0.289274	0.281117	0.272496	0.466688
ENST00000420807	0	0	0	0
ENST00000448412	0	0	0	0
ENST00000447056	0	0	0	0
ENST00000454538	0	0	0	0
ENST00000435554	0	0	0.005248	0
ENST00000430519	0	0	0	0
ENST00000422250	0	0	0	0.066703
ENST00000440885	0	0	0	0.07235
ENST00000429469	0	0	0	0
ENST00000566394	0	0	0	0
ENST00000412162	0	0.006905	0.006715	0.145462
ENST00000432296	0	0	0	0
ENST00000436880	0	0.055523	0.076541	0.271317
ENST00000422480	0	0	0	0
ENST00000440162	0	0	0	0
ENST00000427439	0	0	0	0
ENST00000432488	0	0	0	0
ENST00000452199	0	0	0	0
ENST00000636153	0.052076	0	0	0
ENST00000367355	0.559465	0.025482	0.002249	0.00814
ENST00000367356	0	0	0.019715	0
ENST00000637098	0.010001	0.008847	0.018972	0.023092
ENST00000608159	0	0	0	0
ENST00000637430	0.344674	0	0	0
ENST00000634596	3.93682	0.043798	0.047295	0
ENST00000635220	0.397946	0	0	0.049145
ENST00000427825	0	0	0	0
ENST00000635660	0.064328	0	0	0
ENST00000568695	0.222623	0.045174	0.264848	0.052103
ENST00000446333	0.185336	0.023614	0.844365	0.506062
ENST00000458003	0.39736	0.001193	0.443742	0.69072
ENST00000610411	0.168019	0.027555	0.114589	0.194497
ENST00000415359	0.044156	0	0	0.017876
ENST00000453155	0	0.030404	0.481793	0
ENST00000633182	0.128824	0	0.10566	0.043829
ENST00000430471	0	0	0	0
ENST00000454651	0.01644	0.046388	0	0.016074
ENST00000441932	0	0	0	0
ENST00000449492	0.662049	0.26316	1.41425	3.75095
ENST00000413035	0.130317	2.93768	2.52561	0.073491
ENST00000421449	0	1.12105	1.33472	0.078922
ENST00000421159	0	0	0	0
ENST00000429443	0.299342	0.215011	0.547845	2.25571
ENST00000414927	0	0	0	0
ENST00000458139	0	0	0	0.043651
ENST00000608886	1.06245	1.07729	0.889317	0.734652
ENST00000419190	0.141171	0.044622	0.066024	0.127823
ENST00000415582	0.049847	0.023441	0.062349	0.024369
ENST00000504773	0.038396	0.035766	0	0
ENST00000428573	0.190831	0.624039	0.422701	0.569009
ENST00000411431	0.058796	0.231944	0.02847	0.327377
ENST00000564127	0.084202	0.191914	0.060383	0.205818
ENST00000553157	0	0	0	0
ENST00000417262	0.372607	0.141046	0.195405	0
ENST00000425295	0	0	0	0
ENST00000421055	0	0.041125	0.015314	0
ENST00000434265	0.105908	0.033203	0	0.045562
ENST00000412772	0.082417	0.015123	0	0
ENST00000433008	0	0	0.019057	0
ENST00000457348	0.039265	0	0.058467	0.058449
ENST00000425698	0	0	0	0
ENST00000432511	0	0.283153	0.15371	0.010666
ENST00000367207	0.02636	0.170243	0.021981	0
ENST00000418245	0	0	0	0
ENST00000427799	0	0	0	0
ENST00000565388	0.015934	0.010056	0.001445	0.006
ENST00000433869	0.107575	0.717758	0.12508	0.686802
ENST00000437919	0.216608	0.080146	0.382731	3.55808
ENST00000628516	0	0	0.016123	0.108138
ENST00000443515	0	0.58877	0.294498	0.213604
ENST00000453895	0.366158	0.171607	0.080514	0.221905
ENST00000444037	0.625058	0.316717	0.065562	0.232231
ENST00000435021	1.08476	0.21071	0.040476	0.433712
ENST00000452599	0.036332	0.068342	0.121184	0.142093
ENST00000447832	0.211178	0.154141	0.145952	0.39502
ENST00000626538	0	0.036661	0	0
ENST00000442318	0.264708	0.9436	0.388743	0.094283
ENST00000421166	0.02384	0.067857	0.205295	0.049065
ENST00000425896	0.020836	0	0.016494	0
ENST00000428399	0	0.041319	0.04857	0.014088
ENST00000367119	0.291728	0.097561	0.039662	0
ENST00000562504	0	0	0	0
ENST00000624347	0.02385	0.003739	0.043091	0
ENST00000425161	0.077741	0.162252	0.731434	0.078651
ENST00000619568	0	0	0	0
ENST00000442684	0	0	0	0
ENST00000634239	0	0	0	0
ENST00000417084	0	0	0	0
ENST00000618707	0	0	0	0
ENST00000635698	0	0	0	0
ENST00000439443	0	0	0	0
ENST00000597497	0	0	0	0
ENST00000596003	0	0	0	0
ENST00000623503	0	0	0	0
ENST00000608023	0.154535	0.391879	0.163976	0.325146
ENST00000385231	0	0	0	0
ENST00000385055	0	0	0	0
ENST00000637970	0.122904	0.105722	0.130495	0.239215
ENST00000487977	0.047061	0.070795	0.038218	0.11835
ENST00000435542	0	0	0	0
ENST00000568112	0	0	0	0.043672
ENST00000567538	0	0	0	0
ENST00000415754	0	0	0	0.136127
ENST00000453569	0	0	0	0
ENST00000416349	0	0	0	0
ENST00000448988	0	0	0	0.040945
ENST00000443636	0	0	0	0
ENST00000447257	0	0	0	0
ENST00000429156	0.302486	0.041659	0	0
ENST00000433108	0.551237	0.058926	0.002657	0
ENST00000603283	0.478771	0	0	0
ENST00000431096	0.299539	0	0	0
ENST00000451937	0.198797	0	0	0
ENST00000366437	0.367896	0	0	0
ENST00000444286	1.28447	0.190504	0	0
ENST00000458250	0.052495	0	0	0
ENST00000419143	0	0	0	0
ENST00000440276	0	0	0	0
ENST00000384891	0	0	0	0
ENST00000424696	0	0	0	0
ENST00000453331	0	0	0	0
ENST00000445272	0	0.014812	0.008198	0
ENST00000441672	0	0.050659	0.084243	0
ENST00000475406	0.196829	0.063492	0.035166	0.230828
ENST00000437764	0.517678	0.150871	0.028627	0.122915
ENST00000480052	0	0	0	0
ENST00000625140	0	0	0	0
ENST00000438597	0.00637	0	0.094149	0.102442
ENST00000450040	0	0	0	0
ENST00000423222	0.816304	0.20744	0.427465	0.266518
ENST00000534914	0.056428	0	0.01033	0
ENST00000448567	0.343072	0.01511	0.227184	0.01241
ENST00000610948	0.270572	0	0	0
ENST00000417794	0	0	0	0
ENST00000567907	0.070109	0	0	0
ENST00000452024	0	0	0	0
ENST00000412871	0	0	0.041313	0
ENST00000430123	0	0	0	0
ENST00000415202	0.036089	0	0	0.012341
ENST00000421933	0.014826	0.039774	0.008527	0.000605
ENST00000443174	0	0	0.180722	0
ENST00000458662	0	0	0	0.011204
ENST00000457272	0	0	0	0
ENST00000430623	0	0	0.016525	0.018566
[truncated: 26,233 more rows]
