# Supplementary material for: Temporal expression profiles of lncRNA and mRNA in human embryonic stem cell-derived motor neurons during differentiation
Source: PeerJ. 2020 Nov 13;8:e10075. doi: 10.7717/peerj.10075 (PMC7668206; doi:10.7717/peerj.10075)
Supplement: File S7 [file peerj-08-10075-s008.xlsx]

## Sheet: Expression
Gene_ID	D0	D12	D18	D6
ENSG00000279928	0.166102	0.116368	0.26537	0.136541
ENSG00000279457	6.60892	7.95898	8.86559	6.32144
ENSG00000187634	3.94103	0.116324	2.19024	0.301217
ENSG00000188976	55.1989	29.9606	31.2915	36.797
ENSG00000187961	15.2751	6.68419	12.085	11.4872
ENSG00000187583	1.63477	0.023594	0.239131	0.159184
ENSG00000187642	0.034831	0.146412	1.05729	0.143161
ENSG00000188290	10.1696	168.151	116.798	59.9445
ENSG00000187608	50.2831	46.761	14.5407	28.9115
ENSG00000188157	59.3499	52.7441	58.9247	72.743
ENSG00000237330	0.0313516	0.0175715	0	0.0206176
ENSG00000131591	5.69708	4.68909	5.7464	6.80458
ENSG00000162571	0.131068	0.0254281	0	0
ENSG00000186891	0.21763	0.0487897	0.061812	0.0572478
ENSG00000186827	0.150145	0.00970975	0.209123	0.125323
ENSG00000078808	41.5688	32.2677	30.5848	32.1654
ENSG00000176022	16.7705	17.0776	23.7626	19.1625
ENSG00000184163	1.73951	1.57418	0.743449	1.51919
ENSG00000160087	19.2863	15.4338	18.8972	18.7252
ENSG00000162572	2.50869	1.87656	3.35574	4.36477
ENSG00000131584	10.2419	19.8196	50.337	20.6112
ENSG00000169972	22.9914	13.2328	8.80337	8.94108
ENSG00000127054	22.4909	17.3	15.247	25.0841
ENSG00000224051	10.9883	7.27651	18.0563	9.18999
ENSG00000169962	0.138959	0.374806	2.39272	0.662526
ENSG00000107404	38.1955	36.9742	28.9805	33.7448
ENSG00000162576	6.2177	5.14417	0.56112	4.92079
ENSG00000175756	86.8915	43.7336	43.8634	39.6141
ENSG00000221978	25.7819	31.828	40.1314	47.0147
ENSG00000242485	24.6964	16.6625	15.6122	15.873
ENSG00000235098	0.533759	1.58636	0.288253	0.697084
ENSG00000205116	1.41401	1.29065	0.903623	1.55424
ENSG00000179403	11.2708	29.8479	5.36684	2.61689
ENSG00000215915	0.754882	3.2614	1.01167	0.216983
ENSG00000160072	18.5159	10.9112	11.3873	12.8053
ENSG00000197785	34.9934	17.6035	18.1699	19.3518
ENSG00000205090	4.92601	4.73464	12.1654	5.72592
ENSG00000160075	19.6301	17.5671	17.1199	18.2086
ENSG00000279244	0	0	0.0767051	0
ENSG00000228594	12.0787	4.39201	11.9002	8.02162
ENSG00000197530	10.6742	10.9599	15.3364	15.7919
ENSG00000189409	2.65841	0.654304	1.15493	0.879872
ENSG00000248333	20.4354	16.6338	17.189	17.2126
ENSG00000189339	20.6819	26.2292	52.0149	28.2304
ENSG00000008128	1.31498	1.11617	1.81038	1.23458
ENSG00000215790	5.40769	11.125	23.0256	12.6931
ENSG00000008130	24.3804	19.2216	14.6256	21.5153
ENSG00000078369	67.8825	67.9435	89.9742	65.0248
ENSG00000169885	0.976289	0.100796	0.282761	0.202747
ENSG00000178821	5.84835	2.71519	0.9297	3.4442
ENSG00000142609	0.0457729	0.0304643	0.018282	0.0470336
ENSG00000187730	0.360836	0.130009	0.109806	0.0101698
ENSG00000067606	11.8205	1.31741	7.18348	5.15861
ENSG00000162585	8.84227	7.6878	8.99305	7.70032
ENSG00000157933	44.3405	116.949	51.5859	39.4985
ENSG00000116151	3.01914	3.22949	4.40331	5.31822
ENSG00000157916	15.5145	13.6244	18.8196	16.1448
ENSG00000157911	16.6664	9.02781	9.21919	11.2293
ENSG00000149527	0.0405613	2.43814	1.76929	3.02631
ENSG00000157881	13.3304	12.64	13.9244	17.4535
ENSG00000197921	1.64373	750.232	168.165	313.778
ENSG00000157873	0.0926885	0.24183	0.47999	0.586424
ENSG00000157870	25.4549	17.3747	17.6097	22.4109
ENSG00000142606	0.248203	0.160845	0.0660893	0.489674
ENSG00000215912	1.28995	1.73096	1.9912	2.06218
ENSG00000169717	0.013988	0	0	0
ENSG00000142611	0.66955	0.29941	0.132221	1.52972
ENSG00000130762	16.4039	1.78429	0.567036	1.26533
ENSG00000162591	17.4964	14.8065	15.4261	27.1283
ENSG00000158109	14.6483	6.2024	10.0065	5.14957
ENSG00000116213	5.03457	4.45891	3.44398	5.0746
ENSG00000078900	2.02796	1.01059	1.4337	0.443579
ENSG00000162592	0.0278323	0.0116993	0.039525	0.0320307
ENSG00000235169	6.33394	2.32966	1.5534	3.74061
ENSG00000130764	30.8629	15.9963	22.7364	14.7576
ENSG00000116198	4.09601	4.92446	6.27108	4.58816
ENSG00000169598	3.11764	1.80922	3.53937	3.73401
ENSG00000198912	7.27944	7.44127	4.42421	6.26917
ENSG00000196581	2.84574	1.51681	1.81584	1.08271
ENSG00000131697	5.04055	5.47752	8.15503	12.3627
ENSG00000069424	1.86593	1.74747	4.60539	2.63858
ENSG00000116254	0.765733	1.86536	0.869086	0.176446
ENSG00000116251	59.1236	113.372	41.4339	106.096
ENSG00000158286	2.58385	0.274067	0.65264	3.40039
ENSG00000116237	43.543	20.9579	17.6264	34.6064
ENSG00000173673	74.4314	1.87004	0.54673	236.104
ENSG00000158292	8.97431	12.0559	28.4211	36.8082
ENSG00000097021	33.6182	29.2028	43.8967	32.0925
ENSG00000069812	0.0992558	1.06005	1.42521	0.137799
ENSG00000187017	4.02519	1.10713	0.615939	1.16068
ENSG00000215788	7.88379	1.36055	4.12821	5.55992
ENSG00000171680	17.691	3.11269	8.92102	11.3961
ENSG00000162408	8.21459	6.5623	8.45024	8.97427
ENSG00000173662	0.0274923	0.0231127	0	0
ENSG00000204859	10.5542	10.2237	12.7268	11.491
ENSG00000162413	8.53719	5.71706	6.41162	7.84465
ENSG00000116273	25.1256	15.2215	14.0332	20.3105
ENSG00000041988	6.46292	11.8393	11.1676	8.86472
ENSG00000007923	41.5839	25.2153	26.6184	31.3147
ENSG00000171735	3.31645	3.82577	18.2798	6.19704
ENSG00000049245	8.5053	8.79722	4.11139	7.46642
ENSG00000049246	2.95245	3.18983	1.26517	2.24665
ENSG00000049247	0	0	0	0
ENSG00000049249	0.00313961	0.0263947	0.00334396	0.00309704
ENSG00000116288	63.2213	48.7929	27.1323	42.4294
ENSG00000116285	4.10264	1.88422	3.83863	0.885282
ENSG00000162426	0.984209	0.862141	5.88642	2.30156
ENSG00000142599	31.7187	32.0017	79.1114	49.2357
ENSG00000074800	642.755	335.637	100.285	335.416
ENSG00000131686	0	0	0.00795289	0.0147313
ENSG00000197241	0.0129155	0	0	0.0127403
ENSG00000142583	0.0029698	0	0.00948929	0.00292953
ENSG00000180758	2.16085	2.21168	0.366505	1.44537
ENSG00000049239	11.4493	12.0331	9.49622	10.5178
ENSG00000171621	4.84802	3.30969	4.77785	0.973742
ENSG00000171612	2.82114	3.81124	3.15307	3.37303
ENSG00000188807	13.3083	12.5557	17.0556	12.5199
ENSG00000171608	7.87605	0.80755	6.21878	3.87998
ENSG00000171603	61.4864	65.2698	112.56	96.3296
ENSG00000280113	0.030627	0.0514961	0.293583	0.302116
ENSG00000178585	18.728	13.2273	14.8048	18.7618
ENSG00000162441	2.5184	3.73205	3.47792	2.77198
ENSG00000173614	0.81491	1.11282	0.647517	0.965481
ENSG00000162444	0.623317	0.0194082	0	0
ENSG00000130939	13.4857	9.58729	14.3681	14.4435
ENSG00000054523	13.1499	24.2425	47.0819	20.1053
ENSG00000142657	193.535	221.958	180.371	211.384
ENSG00000251503	0.0088578	0.0148935	0	0.0174754
ENSG00000175279	0.0228601	0.0576555	0.0730441	0.124026
ENSG00000241563	0.0527705	0.236609	0.468376	0.798175
ENSG00000160049	30.2116	18.6586	12.4651	19.7643
ENSG00000142655	17.6868	18.2672	14.8018	14.2783
ENSG00000130940	1.86039	1.05694	30.4729	1.67949
ENSG00000175262	0.127951	0.00467688	0.0118503	0.0384135
ENSG00000120948	12.5332	14.9984	11.3751	14.7015
ENSG00000277726	0	0	0	0
ENSG00000009724	0.378741	0.0314476	0.263948	0.106085
ENSG00000116649	74.6379	39.6896	27.5396	48.8841
ENSG00000171824	14.8804	14.7563	12.3292	16.7624
ENSG00000198793	30.569	21.1284	20.8806	22.526
ENSG00000171819	0.0444077	0	0.0189192	0
ENSG00000120942	8.82375	6.76706	7.03187	7.90159
ENSG00000204624	6.17795	5.99368	32.8934	15.5275
ENSG00000116661	23.5916	0.615989	3.73866	1.11778
ENSG00000132879	13.1198	4.13617	12.1789	6.0929
ENSG00000116663	1.77805	0.811995	1.43787	0.725396
ENSG00000116670	73.1511	25.7947	13.5596	25.7892
ENSG00000162490	13.8808	25.573	27.8423	61.4004
ENSG00000177674	41.5986	16.9026	3.47772	21.9425
ENSG00000215910	0.847192	0.0411398	0.0488628	0.340919
ENSG00000177000	7.37356	5.78012	12.6704	5.64379
ENSG00000011021	8.29684	14.998	22.5346	19.1071
ENSG00000175206	0.141978	1.76057	0.0945116	0
ENSG00000120937	73.407	4.33413	0.305052	3.02304
ENSG00000116685	27.5344	21.4827	17.5572	18.6691
ENSG00000083444	41.9918	18.5763	4.12668	29.9639
ENSG00000116688	37.3077	39.6945	39.225	31.7826
ENSG00000116691	40.7262	38.6989	12.938	27.385
ENSG00000120949	15.4527	0.111761	0.0339817	0.0786812
ENSG00000028137	1.12736	4.12303	0.0830003	1.87566
ENSG00000048707	4.5029	3.44675	6.01718	3.90815
ENSG00000162496	9.77477	35.4355	62.2566	0.41333
ENSG00000204518	0	0.0424393	0	0
ENSG00000188984	0.0589091	0	0	0
ENSG00000157330	0.00482683	0.00405791	0.0411279	0
ENSG00000116726	0	0	0	0
ENSG00000116721	0	0	0	0
ENSG00000239810	0	0	0	0
ENSG00000179172	0.0179394	0.0150817	0	0.0353923
ENSG00000120952	0	0	0	0
ENSG00000243073	0	0	0	0
ENSG00000187545	0	0	0	0
ENSG00000204510	0	0	0	0
ENSG00000232423	0	0	0	0
ENSG00000274764	0	0	0	0
ENSG00000229571	0	0	0	0
ENSG00000277058	0	0	0	0
ENSG00000275774	0	0	0	0
ENSG00000280267	0	0	0	0
ENSG00000179412	0	0	0	0
ENSG00000204505	0	0	0	0
ENSG00000279804	0	0	0	0
ENSG00000270601	0	0	0	0
ENSG00000182330	0	0	0	0
ENSG00000204501	0	0	0	0
ENSG00000204481	0	0	0	0
ENSG00000204480	0	0	0	0
ENSG00000204479	0	0	0	0
ENSG00000204478	0	0	0	0
ENSG00000162494	0.152968	0	0	0
ENSG00000162493	23.1584	52.2186	12.29	16.693
ENSG00000116731	4.79863	10.9613	19.558	11.2496
ENSG00000189337	2.10674	3.52899	12.7443	1.71127
ENSG00000171729	6.35351	1.06679	1.17194	3.13368
ENSG00000142621	0.21111	0.0730798	0.0314128	0.643115
ENSG00000142634	22.9397	17.7471	6.884	19.77
ENSG00000162438	0	0.0191744	0.0121461	0.101243
ENSG00000142615	0.0130855	0.011001	0.0139372	0.0129081
ENSG00000215704	0	0.0114691	0.0290605	0
ENSG00000132906	6.14528	3.9358	4.18269	4.23852
ENSG00000116138	3.14762	3.26287	2.87285	3.71631
ENSG00000116771	3.37112	0.106947	0.0423412	0.164702
ENSG00000197312	5.96503	5.3191	3.69823	6.01501
ENSG00000215695	0	0	0	0
ENSG00000116786	36.2529	37.783	37.2822	36.9695
ENSG00000162461	0.528806	0.774069	3.16068	1.60786
ENSG00000162460	1.66077	0.0549687	0.0557121	0
ENSG00000162458	25.5205	5.70127	7.86042	4.00379
ENSG00000233954	0.857077	3.17346	2.59291	2.66228
ENSG00000065526	28.4682	39.1818	54.8646	46.483
ENSG00000116809	12.2449	19.7018	28.3956	19.0524
ENSG00000183888	0.372814	0	0	0.0129038
ENSG00000173641	0.0762541	0.00427378	0.0162434	0.0250733
ENSG00000186510	1.94423	0.0673035	0.0426336	0.00564078
ENSG00000184908	2.04247	0.113715	0.0720334	0.653801
ENSG00000185519	1.27371	0.540316	0.696975	2.19012
ENSG00000142627	36.7381	49.7498	6.70394	34.7218
ENSG00000142632	32.0419	1.46356	0.910138	4.48692
ENSG00000132881	4.65724	3.60168	4.02858	3.80725
ENSG00000037637	5.30995	5.77538	9.71105	7.26109
ENSG00000055070	37.6979	39.7362	33.386	45.8193
ENSG00000187144	0.127925	0.166882	0.0563798	0.108785
ENSG00000157191	10.2906	7.61125	5.85343	6.87792
ENSG00000268991	0.233846	0.393188	0.373599	0.615133
ENSG00000219481	3.72244	14.4992	11.0118	10.7783
ENSG00000237847	0	0	0	0
ENSG00000279132	0	0	0	0
ENSG00000058453	36.2315	29.2598	21.1491	50.6219
ENSG00000117122	49.1161	17.8971	8.3593	32.3538
ENSG00000159363	32.0233	17.0191	33.7569	17.756
ENSG00000117118	18.02	12.1426	10.1296	6.79329
ENSG00000117115	1.96643	0.686962	0.346711	0.294897
ENSG00000142623	0.202701	0.0306739	0.00431789	0.00799811
ENSG00000142619	2.56175	0.0314402	0	0.11682
ENSG00000159339	0.0200709	0.0112491	0	0
ENSG00000280226	0	0	0	0
ENSG00000276747	0	0	0	0
ENSG00000179051	268.285	107.107	87.8944	123.461
ENSG00000074964	19.0251	13.8246	31.2535	13.7329
ENSG00000117148	0.0533179	0.0448243	0.0227152	0.010519
ENSG00000117154	6.32066	1.26209	7.82317	0.737262
ENSG00000179023	6.65268	0.0227354	0	0.0685972
ENSG00000009709	0.365234	0.018529	0.0301814	1.27962
ENSG00000179002	0	0	0	0
ENSG00000255275	0.0591439	0.0191239	0.0193826	0.0314149
ENSG00000159423	7.25784	4.10854	3.0875	4.44341
ENSG00000169991	2.11682	1.53927	4.79315	0.567181
ENSG00000127481	34.7191	25.551	29.9906	30.218
ENSG00000127463	11.0583	9.81133	8.90557	11.3778
ENSG00000053372	33.9077	19.3456	14.2238	26.1941
ENSG00000162482	2.62701	2.65804	4.65506	5.36622
ENSG00000053371	30.6245	41.1992	24.0591	34.822
ENSG00000040487	12.3953	11.3913	17.6474	11.4242
ENSG00000077549	76.1436	38.6849	36.0057	40.2138
ENSG00000173436	1.17885	0.680951	2.32079	0.934041
ENSG00000270136	0	0	0	0
ENSG00000158747	0.986674	0.110921	0.336041	0.34518
ENSG00000158748	1.52283	0.0168452	0.266767	0.0988274
ENSG00000162542	4.08423	0.0412197	0.00522215	0.0338558
ENSG00000178828	0	0	0	0
ENSG00000169914	4.71441	6.55628	8.48451	8.25786
ENSG00000188784	0	0	0.0539378	0
ENSG00000188257	3.19682	0	0	0.32582
ENSG00000127472	0.00762443	0	0	0
ENSG00000117215	0	0	0	0
ENSG00000158786	0	0	0	0.00608924
ENSG00000187980	0.0180809	0.0152006	0.0128385	0.00594523
ENSG00000162543	0.381768	0.092986	0.159606	0.179497
ENSG00000158816	0.822879	6.14753	0.265587	0.845542
ENSG00000162545	1.83187	26.7176	51.5138	9.96488
ENSG00000090432	15.1237	12.7556	12.6346	11.8867
ENSG00000183114	2.04024	0.46779	2.13188	2.77491
ENSG00000158825	23.3239	0.0173525	0.021984	0.162886
ENSG00000158828	19.4618	6.05047	24.9048	4.41125
ENSG00000244038	120.693	47.7609	41.7343	72.2683
ENSG00000117245	8.53773	5.00941	1.80921	4.82946
ENSG00000189410	5.32987	4.08789	0.828061	8.1834
ENSG00000127483	12.1526	21.9378	25.8047	20.4636
ENSG00000075151	14.2075	17.0135	25.316	20.6964
ENSG00000117298	22.6156	12.0826	10.4207	14.0369
ENSG00000142794	5.6491	3.58643	2.64788	3.95198
ENSG00000162551	112.506	50.2426	6.30823	69.4702
ENSG00000076864	5.03917	1.59701	4.85213	1.58085
ENSG00000090686	4.00594	2.95781	4.00808	3.30333
ENSG00000187942	2.03196	0.547092	0.0754409	0.794775
ENSG00000142798	85.1197	29.1933	4.10986	39.5961
ENSG00000219073	0.0386961	0	0	0
ENSG00000142789	0.0811965	0	0.0172962	0
ENSG00000070831	6.41939	9.06583	9.3379	8.15792
ENSG00000162552	0.930838	0.42819	13.5198	0.0692992
ENSG00000184677	10.0821	9.39965	14.018	14.7818
ENSG00000070886	2.43731	0.00935637	0.185707	0.0512324
ENSG00000173372	0	0	0	0
ENSG00000159189	0	0	0	0
ENSG00000173369	0	0	0	0
ENSG00000133216	5.65688	17.0269	48.346	28.5008
ENSG00000215906	0	0.0101831	0	0
ENSG00000227868	0	0.228563	0.257393	0.0893952
ENSG00000004487	42.0542	54.7403	61.4785	53.6632
ENSG00000169641	14.1122	12.6635	5.93382	10.0595
ENSG00000179546	2.64324	18.4198	1.06786	3.21602
ENSG00000125944	28.1452	55.9462	48.2707	55.344
ENSG00000125945	0.393736	2.40841	4.40572	1.91073
ENSG00000204219	0.401496	0.541962	1.28288	0.334692
ENSG00000088280	27.8906	20.7038	19.2564	7.38617
ENSG00000007968	5.44912	7.23294	5.33048	9.98153
ENSG00000117318	76.0786	36.0433	7.94045	64.2122
ENSG00000197880	0.0092796	0.0546094	0	0
ENSG00000142676	453.838	989.527	308.385	944.814
ENSG00000011007	22.0301	23.2571	26.3111	19.2182
ENSG00000057757	21.6409	17.7348	17.9166	16.1003
ENSG00000011009	75.5793	40.201	46.7951	44.3576
ENSG00000117308	13.7459	6.20447	10.1755	8.97069
ENSG00000117305	3.97327	4.31496	1.90827	4.06494
ENSG00000179163	1.63132	0.644909	1.6651	1.36974
ENSG00000188822	0	0	0	0
ENSG00000189266	25.5206	34.9069	20.2211	27.8663
ENSG00000188529	6.83903	8.17882	7.63229	8.76102
ENSG00000142661	0.0880649	0.0108345	0	0.0741579
ENSG00000142677	0.0568317	0.059723	0	0.0140153
ENSG00000185436	4.99446	0.183296	0.202116	0.167278
ENSG00000158055	0.882857	1.9849	0.0268662	0.427978
ENSG00000001460	1.68385	0.950285	0.268644	1.5919
ENSG00000001461	1.6867	1.26697	1.80324	0.748516
ENSG00000117602	5.48251	0.203067	0.418805	0.989095
ENSG00000184454	0.0675101	0.00405398	0.005136	0.0285405
ENSG00000133226	28.747	27.0216	18.8042	33.6911
ENSG00000169504	24.1618	17.019	7.57809	10.5779
ENSG00000020633	0.430673	0.114531	0.00468066	0.242762
ENSG00000117614	5.63867	7.64616	7.79606	5.28875
ENSG00000117616	7.59552	7.13708	9.84166	7.50981
ENSG00000187010	0.0839953	0.00504391	0.0191705	0.00591831
ENSG00000183726	15.4352	11.271	14.1924	10.3269
ENSG00000188672	0.114376	0.0892874	0.295849	0.22565
ENSG00000204178	2.60263	3.41433	12.7694	3.35084
ENSG00000157978	10.4522	1.80821	0.447183	4.42501
ENSG00000117643	3.6292	0.757211	0.79982	2.41996
ENSG00000162430	68.0236	32.5522	24.6687	67.8856
ENSG00000255054	0	0	0	0
ENSG00000117640	2.55936	3.91836	7.10054	3.63024
ENSG00000127423	3.50817	1.34628	0.342879	1.84837
ENSG00000182749	7.331	7.08054	5.68274	6.54768
ENSG00000117632	10.3431	18.1934	24.7125	7.92963
ENSG00000158006	4.52478	4.17871	2.34616	4.44297
ENSG00000158008	1.40632	1.05707	1.97381	1.11067
ENSG00000158014	0.204565	0.343955	0	0.0056053
ENSG00000158022	0	0	0	0
ENSG00000175087	0.530343	2.67515	3.33781	1.91534
ENSG00000197245	1.25187	0.678242	0.385189	0.370468
ENSG00000282872	0.156717	1.0101	6.62103	0.0257652
ENSG00000236782	0.427336	0.203905	0.0861094	0.216467
ENSG00000142684	44.303	30.6178	20.0694	30.6986
ENSG00000142675	10.4522	3.23215	5.09498	3.14261
ENSG00000188782	0.646244	0.0411588	0.0625732	0.135223
ENSG00000130695	16.4126	21.9129	9.08595	17.8028
ENSG00000142669	65.084	63.904	53.0806	48.7549
ENSG00000158062	6.77353	9.21492	8.98761	11.7419
ENSG00000169442	2.27468	0.554037	0	0.0629113
ENSG00000176092	5.03778	0.964888	0.162268	0.908397
ENSG00000176083	0.0167103	0.00702416	0	0
ENSG00000131914	480.735	222.761	9.52888	446.004
ENSG00000117682	12.0483	7.59975	9.28389	8.99079
ENSG00000198830	146.918	196.09	119.463	155.859
ENSG00000117676	24.1604	8.65344	5.50493	13.0827
ENSG00000117713	44.4515	48.1048	85.2754	60.4267
ENSG00000060642	2.53898	2.01099	2.02817	3.16547
ENSG00000204160	14.2349	15.527	13.2063	16.206
ENSG00000175793	3.31282	0.405103	0.336805	0.519892
ENSG00000142751	8.15596	8.15891	9.16727	8.85265
ENSG00000198746	17.6793	14.7127	15.1667	16.2058
ENSG00000090273	93.246	64.4664	52.3706	61.6712
ENSG00000131910	0	0	0.0183137	0
ENSG00000175707	11.8286	0.0931985	0.0708442	0.087484
ENSG00000253368	10.9645	0.482033	4.81053	0.257992
ENSG00000158246	73.7074	1.87005	0.411253	1.63119
ENSG00000280403	0.21202	0.178245	0.0564549	0.156859
ENSG00000090020	11.845	8.4028	6.36465	9.84634
ENSG00000142784	14.7262	15.5815	27.0642	16.2451
ENSG00000186501	9.16575	10.2406	11.9238	11.4026
ENSG00000142765	3.26061	0.409981	0.0985737	0.797075
ENSG00000142733	6.51991	2.02848	1.72324	3.61178
ENSG00000142748	0.0642078	0	0.00976955	0.0542889
ENSG00000174950	2.23992	0.0163748	0	0.211348
ENSG00000181773	4.07876	1.47748	0.300292	1.94683
ENSG00000158195	42.3487	32.1315	8.88076	30.513
ENSG00000126705	18.5327	13.4674	35.3632	32.6753
ENSG00000000938	0.17737	0	0.012188	0.0112881
ENSG00000126709	2.4128	4.67507	1.34611	7.86561
ENSG00000009780	1.60631	1.00661	1.12308	1.44844
ENSG00000117758	3.07508	4.27973	10.2991	3.62986
ENSG00000117751	17.6065	24.0787	18.2117	20.0247
ENSG00000278868	0	0	0	0
ENSG00000130775	4.8176	0.737706	0.36193	0.975912
ENSG00000117748	15.5254	17.5216	7.92718	15.1013
ENSG00000130768	25.6836	0.112655	0.0237872	0.433271
ENSG00000158156	15.3262	1.9921	0.362748	5.87577
ENSG00000158161	5.04664	5.54181	3.07942	6.16076
ENSG00000169403	0.798286	0.0142036	0.062981	0.0624969
ENSG00000126698	21.5975	20.1764	13.6201	17.3601
ENSG00000130770	33.1699	20.323	25.6807	12.0023
ENSG00000130766	11.2077	51.7285	23.8989	15.6212
ENSG00000130772	9.42159	6.05848	4.52982	3.78745
ENSG00000204138	8.92044	11.062	10.4957	11.6621
ENSG00000180198	56.0776	42.3392	17.5169	41.9531
ENSG00000180098	9.51196	6.24075	7.59215	7.06338
ENSG00000120656	8.35221	6.64987	6.2778	6.98884
ENSG00000188060	4.2945	0.766536	0.0874016	1.81683
ENSG00000162419	6.77335	3.87298	4.42488	4.65671
ENSG00000198492	22.9056	23.8164	21.1103	23.9211
ENSG00000116329	2.42692	0.143054	0.158581	0.461596
ENSG00000159023	12.464	28.1148	36.9712	22.7331
ENSG00000253304	10.0401	0.341935	0.657821	0.245185
ENSG00000116350	16.5868	18.3453	17.514	18.8577
ENSG00000116353	12.7816	8.90061	7.01189	10.8435
ENSG00000060656	18.7197	13.2844	7.16987	8.13696
ENSG00000162510	0.0517852	0.279355	0.289568	0.0681107
ENSG00000162511	0.103209	1.15861	0.142258	0.0239552
ENSG00000162512	29.1895	36.7361	84.0863	41.0597
ENSG00000134644	37.3971	52.09	46.4212	48.6319
ENSG00000084628	23.5102	30.3217	59.1104	31.1604
ENSG00000060688	10.1612	9.66203	5.66768	8.06827
ENSG00000121766	10.968	7.43751	11.8361	8.42065
ENSG00000121769	5.32763	0.293166	1.32058	0.745309
ENSG00000168528	13.6769	12.308	11.7336	15.3312
ENSG00000142910	3.35736	0.253141	0.00400882	0.0556922
ENSG00000121764	0.209803	0.0653264	0.223458	0.0536558
ENSG00000162517	28.2579	28.4161	17.311	19.2992
ENSG00000084636	5.00514	0.10817	0.0776568	0.437881
ENSG00000121753	5.17168	3.87168	12.9819	7.713
ENSG00000134668	1.1222	0.03302	0.0119524	0.193721
ENSG00000184007	5.40771	6.23677	7.84059	6.85804
ENSG00000121774	88.7259	93.7939	117.382	76.1397
ENSG00000121775	12.8002	13.8839	19.8343	17.5215
ENSG00000025800	20.1479	15.522	12.592	13.2271
ENSG00000084652	38.41	44.6759	34.102	43.9254
ENSG00000160050	7.67426	7.97573	12.2456	4.82182
ENSG00000160051	6.49729	9.52862	7.12522	7.34287
ENSG00000222046	0.116985	0.143054	0.305835	0.157362
ENSG00000160055	6.3566	4.7029	9.08836	7.56072
ENSG00000084623	134.979	105.378	55.4731	107.369
ENSG00000183615	6.45574	3.51706	1.10829	4.2315
ENSG00000182866	18.4184	0.0600557	0.0063404	0.0822111
ENSG00000116478	25.2988	25.0046	18.7133	28.419
ENSG00000175130	288.467	321.601	628.29	376.337
ENSG00000162526	0.934423	0.999121	0.715027	1.35131
ENSG00000225828	3.61208	3.33622	17.0183	5.45146
ENSG00000160058	16.5107	15.8151	39.9274	11.9595
ENSG00000254553	0.00576643	0	0	0
ENSG00000273274	0.89364	0.332022	1.09532	1.15194
ENSG00000160062	1.52272	1.19276	2.11856	1.92886
ENSG00000176261	3.86167	3.22757	4.71857	3.7038
ENSG00000162521	13.4017	13.079	15.7673	15.6341
ENSG00000162520	0.102605	0.00479222	0.00607129	0.00562299
ENSG00000162522	37.9311	13.2815	18.3774	19.3805
ENSG00000134684	32.2794	30.9832	9.78096	12.4014
ENSG00000116497	2.57055	1.81209	1.63258	2.07718
ENSG00000160097	1.32977	40.1552	93.6727	12.7114
ENSG00000121905	1.41764	9.28267	10.8777	1.01434
ENSG00000121900	12.8071	6.69835	2.12154	2.17245
ENSG00000116514	8.45339	18.2727	17.3988	9.2102
ENSG00000004455	13.5185	8.29543	4.53946	10.7606
ENSG00000142920	0.6364	2.59867	4.68019	2.59777
ENSG00000116525	6.5693	11.0639	13.7266	7.08252
ENSG00000160094	24.3881	34.645	58.7133	40.186
ENSG00000184389	0.03886	0.40837	2.91794	0.977493
ENSG00000134686	11.0514	87.3018	87.6638	55.7781
ENSG00000121903	2.70368	4.43262	4.25566	4.23693
ENSG00000121904	4.59127	5.75668	4.12872	9.24376
ENSG00000176256	0	0	0	0
ENSG00000142698	1.79787	0.025948	0	0.966667
ENSG00000163866	4.72172	3.99226	4.07922	2.83532
ENSG00000189280	0.220039	0.0123325	0	0
ENSG00000189433	0.0839869	0	0	0
ENSG00000188910	0.216506	0.00700062	0	0.00821422
ENSG00000187513	2.91729	0.963505	0.02466	0.0570977
ENSG00000116544	2.72889	1.10927	12.1157	1.47906
ENSG00000271741	0	0	0	0
ENSG00000243749	0.0646754	0.0181242	0.0459232	0.127597
ENSG00000163867	0.205173	0.346719	0.375248	0.451801
ENSG00000197056	0.625785	0.837601	0.368337	0.714767
ENSG00000116560	69.2747	75.582	113.191	118.732
ENSG00000146463	6.45668	8.17933	8.7761	8.94344
ENSG00000142687	13.6469	10.2252	11.1866	12.3908
ENSG00000020129	21.9952	10.8005	30.2769	13.8093
ENSG00000116819	0.354134	0.801554	4.50685	2.45428
ENSG00000126067	23.4968	26.2372	19.3346	20.1701
ENSG00000142686	7.06564	3.4259	2.86436	5.8298
ENSG00000092853	5.79666	4.95045	2.98525	6.67469
ENSG00000134698	3.04157	2.97556	7.57737	4.11736
ENSG00000092847	23.6945	32.3812	43.8933	18.0033
ENSG00000126070	1.70143	2.52509	3.81745	3.09165
ENSG00000092850	1.04509	4.80701	7.4065	7.95991
ENSG00000116863	27.8491	24.3845	20.3202	25.8963
ENSG00000171812	1.67698	0.0465174	0.0271999	0.319092
ENSG00000054116	10.4767	6.73252	6.1465	5.31461
ENSG00000116871	35.2701	71.5625	133.141	57.3341
ENSG00000054118	76.9684	65.7481	52.2381	64.6637
ENSG00000214193	15.3631	6.55496	4.27765	8.01123
ENSG00000142694	9.84817	10.9425	2.46495	5.37543
ENSG00000196182	11.7306	30.6678	28.8284	23.0763
ENSG00000181817	30.1077	20.6647	16.9393	15.1642
ENSG00000116885	0.677297	1.42051	2.9083	1.86368
ENSG00000116898	15.1531	11.6217	7.15851	12.3992
ENSG00000119535	0.0165071	0.019825	0	0.00697853
ENSG00000163873	0.918061	5.55804	7.04361	83.5625
ENSG00000163874	7.20593	3.35067	1.73875	3.42201
ENSG00000163875	5.67178	8.82728	11.1226	7.23678
ENSG00000163877	4.59511	5.01862	5.42692	4.82161
ENSG00000163879	4.65251	7.86773	9.4213	8.10079
ENSG00000134697	10.383	10.4626	5.11485	9.77125
ENSG00000169218	0.276694	0.00540967	0.185046	0.304679
ENSG00000116922	8.48153	8.10274	4.33534	7.31849
ENSG00000134690	29.6664	55.4918	13.2649	33.6398
ENSG00000183317	0.168242	0.0163989	2.16588	0.11064
ENSG00000185090	4.63663	4.39079	29.4971	1.52675
ENSG00000196449	12.2679	8.39185	6.59697	5.98099
ENSG00000197982	20.456	12.3362	16.5398	10.5024
ENSG00000188786	2.58865	3.63407	3.8811	5.22439
ENSG00000204084	4.12229	2.91358	2.30435	3.00148
ENSG00000183431	15.2641	14.1405	9.29899	15.2929
ENSG00000183386	14.9771	11.6573	7.10969	14.8621
ENSG00000183520	6.66478	6.60027	6.26049	5.5086
ENSG00000185668	5.35147	2.63205	9.17005	3.65393
ENSG00000116954	0.56934	0.514219	0.58591	0.531262
ENSG00000214114	0.405518	0.159462	0.0487641	0.251624
ENSG00000274944	0	0	0	0
ENSG00000131233	0	0	0	0.00953201
ENSG00000158315	0.170678	0.0119574	0	0.0140303
ENSG00000174574	57.4117	39.0054	50.6982	23.1626
ENSG00000168653	93.8349	71.355	38.478	50.056
ENSG00000127603	17.697	31.9877	33.4333	16.3916
ENSG00000183682	0.505146	0.148143	0.487975	0.0811179
ENSG00000090621	30.3136	26.4283	19.4163	32.7242
ENSG00000163909	1.33019	22.9547	1.74639	5.93951
ENSG00000116981	0.0179556	0.0150953	0.13387	0
ENSG00000116983	0.0240349	0.0673538	2.84152	0.0434665
ENSG00000084072	4.94521	7.24238	3.59357	5.99809
ENSG00000116985	0.284427	0.232186	0.219521	0.243974
ENSG00000198754	1.80699	0.228785	0.220286	0.30066
ENSG00000043514	5.57568	9.68242	7.68756	10.124
ENSG00000116990	9.48893	18.6644	13.9075	6.80429
ENSG00000168389	3.74025	4.34131	8.54855	1.91816
ENSG00000131236	31.6185	24.1413	19.0447	20.2911
ENSG00000131238	11.5678	10.1547	3.92546	11.3101
ENSG00000117000	3.24599	3.69471	2.98612	3.96793
ENSG00000188800	0	0.0751878	0.023814	0.0220555
ENSG00000084073	3.96202	2.88644	3.26568	3.0959
ENSG00000049089	63.1023	2.25839	0.923122	5.03055
ENSG00000084070	4.89395	7.93414	20.1503	7.60318
ENSG00000187801	6.05637	7.76694	8.26949	5.7195
ENSG00000187815	1.9216	1.43541	1.22539	1.92572
ENSG00000164002	3.92781	3.38858	3.66994	3.89991
ENSG00000117010	0.97455	0.692834	0.417978	0.896815
ENSG00000117016	10.9701	24.2146	52.6178	14.5856
ENSG00000066136	10.2636	13.4939	15.6783	10.1932
ENSG00000117013	2.9984	3.43158	1.33107	1.05466
ENSG00000179862	9.34939	6.43785	6.08092	8.16476
ENSG00000171793	23.7526	29.5233	12.4574	28.8115
ENSG00000171790	0.0922362	0.263646	2.53458	0.591405
ENSG00000010803	7.63877	21.3174	19.4044	18.9769
ENSG00000204060	2.49497	2.05571	2.07468	1.23466
ENSG00000127129	0.0363824	0.0509777	0.0258336	0.011963
ENSG00000127124	0.26003	0.78863	7.10253	0.650912
ENSG00000044012	0	0	0	0
ENSG00000197273	0.523996	0	0	0
ENSG00000198815	9.30837	8.14554	10.4824	10.2631
ENSG00000177181	1.87902	0.295843	3.54533	0.550167
ENSG00000066185	0.153944	0.0380649	0.115739	0.116126
ENSG00000127125	5.61772	3.65824	3.17968	2.75563
ENSG00000186409	0.0956752	0.139832	0.873225	0.185852
ENSG00000171960	4.39109	4.03875	1.97925	4.58953
ENSG00000065978	386.055	491.773	526.863	514.383
ENSG00000164007	8.39884	0.24124	0.0470197	0.95805
ENSG00000117385	18.1407	16.5228	12.7286	16.4225
ENSG00000164008	0.809703	0.889323	2.40638	0.953314
ENSG00000283580	0	0.0371895	0	0
ENSG00000274386	0.440901	1.08907	0.803641	0.816039
ENSG00000177868	9.379	13.1	18.3841	10.2582
ENSG00000164010	1.49366	1.21964	1.14287	1.91374
ENSG00000164011	15.8937	11.827	9.71186	13.0202
ENSG00000117394	64.2056	294.314	34.8518	131.636
ENSG00000186973	4.76291	7.07668	3.54099	13.467
ENSG00000117395	17.5046	9.78415	7.61571	11.0398
ENSG00000243710	0.0931083	0.208736	0.326888	0.329964
ENSG00000179178	7.08354	0.08642	0	0.0737465
ENSG00000253313	4.01209	0.0771592	0.0418943	0.129336
ENSG00000066056	0.486975	5.28475	0.433279	0.357349
ENSG00000117400	0.214835	0.125643	0.0795887	0.0552839
ENSG00000117399	127.678	139.809	32.3065	74.7831
ENSG00000066322	10.5053	7.74535	4.54319	6.21773
ENSG00000159479	5.22651	10.3699	8.22866	4.61904
ENSG00000198198	6.48932	5.10217	12.4887	9.33775
ENSG00000178922	12.9272	9.41032	4.24185	10.8628
ENSG00000142949	79.2478	81.6586	57.2468	76.416
ENSG00000066135	41.6946	24.9268	42.0792	32.7206
ENSG00000126091	7.34143	11.0651	9.90153	14.8059
ENSG00000117407	6.78267	0.257761	1.38589	1.33519
ENSG00000117408	9.56891	10.7075	18.6258	10.9436
ENSG00000132768	31.8912	10.916	8.2298	12.0187
ENSG00000117410	27.6027	21.2675	38.3766	18.5701
ENSG00000117411	39.7116	41.5857	27.1255	34.9107
ENSG00000159214	7.03577	0.794618	2.15638	1.09788
ENSG00000196517	6.74636	11.1263	5.72045	25.5857
ENSG00000171872	0.0126968	0	0.00676161	0
ENSG00000283039	0.00629215	0	0	0
ENSG00000178028	11.9531	11.5293	13.8541	9.2066
ENSG00000117419	33.073	32.4912	31.4274	37.3668
ENSG00000187147	18.4693	43.214	42.5379	26.5115
ENSG00000126106	3.39575	2.95134	2.99359	3.00988
ENSG00000198520	0.351581	1.4462	2.44739	2.52059
ENSG00000142945	38.549	54.3755	10.835	31.1696
ENSG00000142937	584.187	1047.59	277.419	895.726
ENSG00000142959	1.26233	0.187758	0.372321	0.239465
ENSG00000173846	4.14792	20.6011	18.1767	9.36126
ENSG00000188396	0	0.153307	0.221972	0.102791
ENSG00000222009	0.677622	1.82771	2.30351	1.6488
ENSG00000117425	0.629236	7.25343	4.02525	1.81641
ENSG00000070785	4.72011	6.09435	2.6502	4.34569
ENSG00000126107	16.9954	10.3844	13.7148	9.46575
ENSG00000126088	39.5692	23.4567	14.7495	23.1809
ENSG00000162415	3.6361	4.90314	16.44	6.86874
ENSG00000186603	4.07544	4.31867	0.805757	5.15159
ENSG00000132781	19.2972	17.5911	8.84952	21.2074
ENSG00000132773	10.6489	8.89154	7.67454	10.5617
ENSG00000070759	6.39627	1.75556	0.669149	3.34069
ENSG00000280670	0.569559	0.448522	0.291797	0.448046
ENSG00000132763	3.34034	3.9883	2.6823	4.59825
ENSG00000117450	39.6493	23.3639	7.76163	15.588
ENSG00000117448	75.75	72.4692	21.6997	61.9695
ENSG00000132780	122.648	77.9279	46.1883	91.8127
ENSG00000159588	2.97286	1.6092	3.7907	4.30146
ENSG00000159592	15.7026	10.9575	7.46226	11.393
ENSG00000159596	5.2239	5.67293	3.61957	3.73818
ENSG00000197429	1.50217	2.04765	1.43423	1.46592
ENSG00000086015	21.4111	25.3447	21.012	21.0038
ENSG00000117461	2.93191	16.2121	31.8873	22.2772
ENSG00000278139	0	0	0	0
ENSG00000117472	0.00840106	0.00706276	0.268435	0.00828713
ENSG00000250719	0	0	0.160789	0
ENSG00000085998	20.2682	15.907	14.7764	16.1623
ENSG00000171357	6.00381	3.02844	1.25608	1.68154
ENSG00000085999	32.8786	16.7313	6.2154	24.6679
ENSG00000132128	14.7264	22.2386	17.0895	19.8443
ENSG00000173660	123.031	88.6439	63.602	94.4439
ENSG00000117481	3.48339	3.40998	2.58757	4.41559
ENSG00000117480	7.26767	3.66595	8.37368	4.17433
ENSG00000197587	0.624585	0.0057702	0.00731029	0.040623
ENSG00000282881	0	0	0	0
ENSG00000162456	0	0	0.015068	0
ENSG00000079277	2.44336	1.89261	2.63911	3.10268
ENSG00000142961	1.31706	0.807843	0.39006	1.12686
ENSG00000123472	2.25134	3.11427	5.3663	2.17936
ENSG00000186118	0.0533608	0.0224302	0.0852508	0
ENSG00000159658	8.05512	4.7353	3.40549	4.2584
ENSG00000142973	0.0114895	0	0	0
ENSG00000187048	0.020439	0.034366	0.0326539	0
ENSG00000186377	0.850307	0.131166	0.589919	0.00769519
ENSG00000186160	0	0	0.0106065	0
ENSG00000162365	0.0566587	0.0389724	0.0329162	0.00508094
ENSG00000162366	0	0.0813445	0	0
ENSG00000162367	0.129025	0.170037	0.025999	0.0584781
ENSG00000123473	1.65754	1.45996	0.464586	1.36076
ENSG00000162368	4.60726	4.60799	4.90713	4.90184
ENSG00000186790	0.0903039	0.067483	0.106868	0.0890793
ENSG00000186564	0.106294	0.0929353	0.00452847	0.0209704
ENSG00000269113	6.41746	2.11435	0.0993219	4.64399
ENSG00000279096	0.120466	0.0253189	0.0160383	0.0668433
ENSG00000117834	5.28151	0.0552717	0.0233413	0.129707
ENSG00000132122	0.592391	0.860988	1.13	1.38661
ENSG00000186094	0.0479475	0.0335912	0.360314	0.0499249
ENSG00000162373	2.81698	9.3166	19.6259	6.16284
ENSG00000162374	0.0314011	4.7638	21.876	0.974313
ENSG00000142700	0.0862873	0.373071	0.223194	0.231032
ENSG00000185104	4.63663	5.84922	4.18642	5.53528
ENSG00000123080	0.0658969	3.97365	2.36718	1.05778
ENSG00000204006	0	0	0	0
ENSG00000123091	10.747	9.27587	21.0825	6.11081
ENSG00000085831	1.42675	0.0464081	0.0655787	0.0376984
ENSG00000085832	1.1301	1.57222	1.69308	1.8685
ENSG00000117859	3.25403	5.38006	5.51552	5.02383
ENSG00000078618	17.488	15.6387	11.6846	14.4272
ENSG00000169213	13.5706	1.50269	3.58503	5.30028
ENSG00000117862	7.73721	6.1594	3.75589	5.77958
ENSG00000198841	6.07672	4.39698	3.94015	3.29458
ENSG00000134717	1.8616	3.19392	3.20969	2.53964
ENSG00000157077	4.05134	5.92591	7.21965	5.76508
ENSG00000154222	11.2631	6.896	9.73933	8.48388
ENSG00000085840	25.8456	14.7203	4.21803	21.129
ENSG00000134748	9.13747	8.3198	7.00823	8.719
ENSG00000134744	3.4934	5.97076	9.62276	5.90073
ENSG00000116157	8.67484	1.41313	0.212833	2.50455
ENSG00000182183	1.28391	0.273178	0.506474	0.211084
ENSG00000162377	15.8299	10.7565	7.57364	10.1544
ENSG00000162378	3.11319	3.83416	6.0196	3.42495
ENSG00000203995	0.550489	0.0355997	0	0.162907
ENSG00000121310	4.94174	0.103971	0.129892	0.211797
ENSG00000116171	1.18472	1.19116	0.650031	1.10491
ENSG00000279054	0	0	0	0
ENSG00000174348	1.436	0.815062	0.250591	0.192072
ENSG00000162383	0.312472	0.0185432	0	0
ENSG00000157184	3.6285	1.92653	1.52521	2.04665
ENSG00000162384	7.47322	6.59928	4.0152	5.72446
ENSG00000162385	10.9235	16.0023	8.26276	12.6382
ENSG00000157193	17.5381	15.347	16.8118	16.1936
ENSG00000143006	0.00814627	0.00684856	0	0
ENSG00000174332	0.242635	0.772987	0.0544057	0.365315
ENSG00000058804	5.55856	5.36948	1.64912	4.6966
ENSG00000058799	3.13241	2.31128	3.51993	3.03323
ENSG00000211452	0.0348412	0.0732274	0.00927721	0
ENSG00000081870	2.77638	2.57164	1.32153	3.10834
ENSG00000116212	13.2485	11.7618	6.49782	11.6213
ENSG00000203985	0	0	0	0
ENSG00000116209	3.74769	4.18082	11.3223	2.91678
ENSG00000116205	1.38748	2.30966	1.83467	2.12279
ENSG00000256407	0.00502958	0.0295985	0.0589263	0.0595365
ENSG00000157211	0.049246	0.041401	0.0065564	0.0850118
ENSG00000215883	3.23562	2.66963	1.39224	3.71455
ENSG00000116221	42.6702	29.2253	15.498	25.4765
ENSG00000157216	37.3277	46.9633	111.151	19.0297
ENSG00000162390	2.19159	0.13857	0.0628529	0.459673
ENSG00000162391	0.0396547	0	0.0211178	0.00977923
ENSG00000184313	0.168411	0.00735497	0.0116476	0.107875
ENSG00000271723	0	0	0	0
ENSG00000243725	0.811532	1.16078	0.76231	0.783849
ENSG00000162396	7.30034	7.63257	3.22024	5.9482
ENSG00000006555	0.295445	0.00275978	0.0139855	0.00323821
ENSG00000162398	0.156599	0	0	0.011034
ENSG00000116133	148.927	109.342	58.7596	82.4616
ENSG00000143001	0.634176	0	0	0
ENSG00000162399	0.30342	0.0529422	0	0
ENSG00000169174	35.2565	9.8297	0.301769	7.91616
ENSG00000162402	3.88859	4.85615	5.9113	5.38486
ENSG00000162407	6.95278	9.63556	5.45886	8.30883
ENSG00000162409	0.667238	1.47561	1.14521	1.4673
ENSG00000187889	0.265998	0.0108205	0.0411257	0.0253926
ENSG00000157131	0.00843671	0	0	0
ENSG00000021852	0	0	0	0
ENSG00000173406	2.96257	0.854564	1.76422	1.75084
ENSG00000162600	0.299383	0.323603	0.113882	0.23204
ENSG00000184292	0.574917	0.078186	0	0.00834001
ENSG00000162601	3.81837	2.0846	1.75277	2.80795
ENSG00000177606	16.5697	25.3018	85.5795	16.1401
ENSG00000172456	1.12006	2.05209	0.605173	1.21117
ENSG00000134709	1.85886	0.28436	0.604606	0.681818
ENSG00000134716	0.152899	0	0.0212414	0
ENSG00000162598	0	0	0	0
ENSG00000162599	0.380279	0.0430366	1.76227	0.328232
ENSG00000162604	3.24315	3.52023	4.09518	3.26671
ENSG00000132849	4.6045	0.333731	2.29956	0.917004
ENSG00000240563	91.6641	2.88711	0.0275014	0.845628
ENSG00000132854	0.309122	0.575645	0.485012	0.0983647
ENSG00000162607	8.2529	9.07062	4.81218	8.09959
ENSG00000116641	0.896666	1.35783	1.7645	1.53803
ENSG00000132855	0	0	0	0
ENSG00000125703	0.850041	1.40776	0.578618	1.2294
ENSG00000187140	9.70023	0.10414	4.93237	0.281985
ENSG00000088035	0.646501	0.425358	0.337874	0.724878
ENSG00000142856	0.61535	0.560179	0.255955	0.743492
ENSG00000203965	0.135904	0.307609	0.553019	0.402185
ENSG00000079739	55.1402	6.5126	3.26617	11.122
ENSG00000185483	12.3938	1.87884	1.08139	4.4383
ENSG00000177414	0	0	0	0
ENSG00000158966	20.9357	18.1037	17.2601	26.0813
ENSG00000162437	2.83581	2.75296	1.70551	4.01515
ENSG00000162434	5.13835	5.60543	8.85432	2.60107
ENSG00000162433	9.69189	0.597591	0.564326	1.24454
ENSG00000116675	1.38058	0.862678	5.93654	1.37877
ENSG00000213625	2.97565	2.6516	2.4255	2.92781
ENSG00000116678	0.118877	0.0749547	0.119166	0.213836
ENSG00000184588	0.0942796	1.00912	3.45333	0.222295
ENSG00000118473	0.0379439	0.135572	4.50408	0.0917019
ENSG00000152760	0.109002	0.00539048	0.0751215	0.0505996
ENSG00000172410	0	0	0	0
ENSG00000152763	0.163071	0.466119	0.461054	0.286623
ENSG00000198160	1.25177	1.51895	1.25903	1.58319
ENSG00000116704	0.374184	1.25559	1.04101	0.913228
ENSG00000203963	0	0	0	0
ENSG00000162594	0	0	0	0
ENSG00000081985	0.709051	0.0434244	0	0.157489
ENSG00000142864	117.477	91.7749	43.6816	92.6317
ENSG00000116717	10.7598	34.5194	14.2331	10.4907
ENSG00000172380	2.33103	0.707472	0.255445	1.02104
ENSG00000162595	0.130968	0.177861	0.236064	1.06335
ENSG00000116729	4.97256	3.60085	5.09724	22.2705
ENSG00000116745	0	0.00640248	0	0
ENSG00000024526	2.78425	2.7681	0.727919	2.02915
ENSG00000033122	0.100388	0.0330743	2.85511	0.163261
ENSG00000066557	8.50489	10.2673	6.56259	7.1318
ENSG00000116754	12.8134	12.1369	12.483	16.157
ENSG00000118454	7.53549	8.13886	10.2098	8.01789
ENSG00000197568	3.3345	2.81699	1.16075	2.61538
ENSG00000279230	0	0	0	0
ENSG00000116761	3.26067	5.45479	2.5082	2.70474
ENSG00000050628	0.0329463	0.00865559	0.366258	0.00203122
ENSG00000132485	4.25166	7.13534	6.0124	8.11312
ENSG00000172260	0.0845131	0.168277	4.6365	0.26619
ENSG00000162620	0.00453862	0.0171703	0.0120851	0.0268625
ENSG00000254685	0.0570629	0.0639636	0.0607769	0.150104
ENSG00000259030	0	0.0124998	0.0022623	0.0440003
ENSG00000116783	0	0	0	0.00415498
ENSG00000162621	0	0.00433026	0	0.0152428
ENSG00000178965	0	0.00951731	0.0506416	0.0111672
ENSG00000116791	0.467119	0.396797	0.233214	0.412786
ENSG00000162623	0.943033	1.10052	0.330217	1.24457
ENSG00000162624	0.00999593	0	0	0
ENSG00000137968	0.612179	1.16992	3.7777	0.918268
ENSG00000117054	2.87993	3.35747	3.50114	1.91441
ENSG00000137955	3.7078	2.80628	1.50017	4.01564
ENSG00000057468	0.669461	0.521883	0.829711	0.318184
ENSG00000154007	0	0	0	0
ENSG00000184005	0.780025	0.600349	0.491455	1.89111
ENSG00000117069	2.27071	7.35371	7.55845	7.17511
ENSG00000142892	0.782385	0.915394	0.433934	0.729096
ENSG00000154027	0.519977	0.437144	0.373293	0.0708461
ENSG00000036549	2.19334	2.70284	2.85079	3.70903
ENSG00000077254	2.96516	4.21506	7.86171	4.10683
ENSG00000180488	0.783142	1.00151	1.50052	1.42447
ENSG00000162614	0.766219	0.403071	0.171808	0.711629
ENSG00000162613	37.3262	57.6875	45.1996	49.4163
ENSG00000162616	2.46425	2.34998	2.28887	2.32199
ENSG00000137960	0.245147	0	0.0373003	0
ENSG00000122420	0	0	0	0
ENSG00000137959	0	0	0	0
ENSG00000137965	0	0	0	0
ENSG00000162618	0.0281782	0	0	0
ENSG00000117114	2.75826	5.62691	6.93219	10.6558
ENSG00000137941	0.111234	1.06352	1.8012	1.0303
ENSG00000142875	1.59488	2.08571	2.13279	2.25499
ENSG00000203943	0.126568	0.125752	0.00612753	0.136202
ENSG00000137976	0	0	0	0
ENSG00000117133	8.65013	11.6722	6.07675	9.59943
ENSG00000174021	28.7786	28.6423	13.2697	31.6856
ENSG00000117151	0.295045	0.262494	0.0793249	0.248659
ENSG00000117155	0.658038	1.35208	1.11992	1.35951
ENSG00000171517	2.73777	0.731054	0	5.65586
ENSG00000153898	0.398462	0.0291293	0	0.165199
ENSG00000162643	0	0.123529	0.0161896	0.0399844
ENSG00000055732	0.114045	0.0126155	0.0191792	0.011842
ENSG00000097096	2.53584	2.72248	0.813875	1.42853
ENSG00000162642	5.48068	7.37802	6.22119	5.71021
ENSG00000142867	3.0249	1.86133	1.98263	2.70566
ENSG00000153904	6.11697	3.28216	2.25042	3.10493
ENSG00000142871	19.4478	10.1692	5.19995	11.1574
ENSG00000117174	3.69504	5.68701	6.97602	6.30903
ENSG00000171502	0.353164	0.00873249	0.236753	0.0430345
ENSG00000122417	1.99535	1.61462	3.60161	2.35152
ENSG00000137975	0	0	0	0
ENSG00000016490	0	0	0	0
ENSG00000016602	0	0	0	0
ENSG00000097033	3.31041	4.27173	7.39017	3.86391
ENSG00000183291	9.96208	7.85862	6.09045	6.24676
ENSG00000153936	1.9612	2.75322	1.63004	3.32024
ENSG00000267561	0.0197485	0.00830128	0.0420678	0.0584422
ENSG00000143013	6.06905	5.82418	5.87246	3.62701
ENSG00000065243	3.01742	4.75608	4.02109	5.62606
ENSG00000137947	1.51868	1.65227	2.97816	1.30422
ENSG00000137944	1.78427	3.09427	1.50563	2.34676
ENSG00000213516	5.2867	4.08975	3.37098	4.45955
ENSG00000117226	0	0	0	0
ENSG00000117228	0	0	0	0.00392776
ENSG00000162645	0	0.0026626	0.00674653	0
ENSG00000213512	0	0	0	0
ENSG00000162654	0.126522	0.182733	0.314432	0.169608
ENSG00000154451	0.00244098	0.00205213	0	0.00240788
ENSG00000183347	0	0	0	0.00656423
ENSG00000197147	2.27172	1.74905	0.949663	2.35054
ENSG00000171488	0.0745977	0.118302	0.0234747	0.18062
ENSG00000271949	0	0	0	0
ENSG00000171492	5.66565	7.23937	7.31721	5.42314
ENSG00000162664	3.60839	3.9905	5.07678	4.55553
ENSG00000143032	0	0.0591073	0.139069	0.069354
ENSG00000122482	3.96806	4.14026	4.68014	5.38403
ENSG00000162669	0.238782	0.656719	1.00639	1.09696
ENSG00000097046	5.78369	9.14684	3.5949	9.32135
ENSG00000069702	0.810603	2.50897	1.05306	2.03394
ENSG00000137948	0.119243	0	0	0.00452408
ENSG00000172031	0.167775	0.0371179	0.0470249	0.121947
ENSG00000230667	0	0	0.02329	0
ENSG00000189195	0.390083	0.259925	0.224663	0.253679
ENSG00000069712	0	0	0	0
ENSG00000203910	0.0187341	0	0	0
ENSG00000174842	1.15436	1.49303	1.09127	1.63732
ENSG00000122484	0.99141	1.47979	5.44394	2.11035
ENSG00000162676	0.126451	0.0455602	0.0897875	0.148496
ENSG00000067208	1.79651	1.79502	1.41206	2.60373
ENSG00000122406	62.8633	126.832	45.5131	128.771
ENSG00000154511	0.366543	0.135154	1.06846	0.539186
ENSG00000143033	11.5144	12.067	12.3104	9.76884
ENSG00000117500	1.39853	3.18143	1.33678	2.46366
ENSG00000122483	1.74668	2.29313	1.22145	2.34606
ENSG00000117505	4.70735	4.73125	4.35826	3.51174
ENSG00000137942	17.388	11.0615	27.2757	12.668
ENSG00000137936	10.3958	27.4586	15.2838	3.35604
ENSG00000067334	2.89734	2.92917	1.88365	2.69898
ENSG00000023909	1.1222	0.579626	0.812451	0.596903
ENSG00000198691	0.142999	0.052978	0.0129073	0.0717255
ENSG00000137962	0.485271	0.0581272	0.0081824	0.147775
ENSG00000117528	1.30327	1.94685	2.32007	1.93492
ENSG00000117525	7.07272	4.01633	0.176729	4.56255
ENSG00000143036	0.762098	0.704764	0.08117	0.0751763
ENSG00000117519	29.7243	36.053	22.9684	26.3228
ENSG00000172339	0.278561	0.249799	0.27911	0.173012
ENSG00000152078	0.574663	0.108363	0.140146	0.140393
ENSG00000271092	0.0101361	0	0.0431833	0.0199973
ENSG00000122481	1.02293	0.649196	0.59816	0.84088
ENSG00000117569	1.42121	1.6301	2.99141	1.82175
ENSG00000188641	0.265313	0.54206	3.56841	0.118685
ENSG00000162627	2.57717	1.6088	0.583805	1.62209
ENSG00000117598	0.117409	0.175477	1.48208	0.0600532
ENSG00000117600	0.139928	0.0120653	0.382141	0.0106177
ENSG00000099260	0	0.00202699	0.005136	0
ENSG00000156869	0.210691	0.22033	0.060206	0.385253
ENSG00000162688	1.20195	0.618173	0.444297	0.660243
ENSG00000283495	0	0	0	0
ENSG00000117620	2.25064	0.999332	1.02734	1.10546
ENSG00000156875	8.13177	9.53912	8.54593	9.76703
ENSG00000156876	2.0017	2.40224	1.46574	1.86596
ENSG00000122435	0.663685	1.3949	1.06545	1.3663
ENSG00000122477	0.00998337	0.0503581	0.0744321	0.0886319
ENSG00000137992	2.24391	1.91898	1.59393	1.75725
ENSG00000137996	10.3606	9.21635	11.2371	8.2768
ENSG00000079335	1.67452	2.56693	1.74935	2.23873
ENSG00000181656	0.0170813	0.00957347	0.297153	0
ENSG00000162692	0.134725	0.0248627	0.024499	0.0356556
ENSG00000162694	0.670239	1.08546	1.44086	1.38314
ENSG00000162695	1.73709	2.20253	2.39104	2.10915
ENSG00000117543	4.17616	6.20595	1.53968	5.53231
ENSG00000170989	0.323623	10.0829	6.90061	7.92339
ENSG00000118733	0.0133015	0.0260927	0.779199	0.0787268
ENSG00000060718	2.59473	8.00513	3.88592	13.1765
ENSG00000185946	1.18677	1.84699	2.5311	1.99015
ENSG00000240038	0.00530687	0.0200767	0.214787	0.0444967
ENSG00000243480	0	0	0	0
ENSG00000237763	0	0	0	0
ENSG00000174876	0	0	0	0
ENSG00000187733	0	0	0	0
ENSG00000198890	20.2644	13.2675	12.9403	12.4045
ENSG00000162631	0.0195767	0.0128008	2.46041	0.00858278
ENSG00000134215	0.647892	0.344736	1.19669	0.188766
ENSG00000085491	3.56072	2.552	1.79439	3.26689
ENSG00000196427	0.0461181	0.0193857	0.0163732	0.00758212
ENSG00000186086	0	0.024183	0.0153188	0
ENSG00000162636	2.4392	3.03486	1.86473	1.80669
ENSG00000162639	1.60588	0.0206642	0.157078	0.0889039
ENSG00000134186	11.7614	11.6344	12.4068	11.7233
ENSG00000143107	0.0894818	0	0.0317686	0.0176537
ENSG00000116266	1.31164	1.70648	0.797264	1.69964
ENSG00000162641	0.00404413	0.0135996	0.0387661	0
ENSG00000274068	0	0	0	0
ENSG00000121957	1.75478	2.11692	1.70431	1.83509
ENSG00000121940	8.14857	10.035	7.26727	11.6957
ENSG00000085433	0.489844	2.41798	9.50595	1.86631
ENSG00000197780	4.00378	1.79041	2.40438	1.91872
ENSG00000215717	2.63345	4.11369	3.6426	3.00069
ENSG00000179902	0	0.0270615	0.462839	0.0317528
ENSG00000116299	0.170984	0.199448	2.4221	0.360522
ENSG00000031698	36.5774	93.9899	48.8922	35.3812
ENSG00000143126	19.6178	123.729	112.614	80.1442
ENSG00000134222	36.8645	44.7876	12.8729	21.2144
ENSG00000221986	0.0333319	0.233517	0.520686	0.306879
ENSG00000134243	4.38767	6.21718	9.41352	5.13302
ENSG00000143106	4.06289	3.29305	2.43736	3.2953
ENSG00000143028	0.631968	0.0463829	0.080131	0.0049476
ENSG00000162650	4.04224	5.51906	11.2084	8.12476
ENSG00000174151	2.49771	3.60054	4.29365	3.856
ENSG00000181754	1.06649	2.28697	3.44063	1.84486
ENSG00000156097	0.227973	0.0330443	0.226065	0.0348954
ENSG00000065135	2.15563	2.17936	1.94379	1.89767
ENSG00000134183	0.129538	0.0484011	0.0306598	0
ENSG00000116337	12.9988	18.0624	15.4707	20.7971
ENSG00000168765	3.94626	3.95114	1.31832	3.35767
ENSG00000213366	0.558193	1.0302	0.550399	1.77232
ENSG00000134184	3.48954	1.52337	0.337112	3.09097
ENSG00000134201	0.0132226	0.0361278	0.0281664	0.0847815
ENSG00000134202	0.866214	3.22952	4.97843	2.87299
ENSG00000198758	0	0	0.00608876	0
ENSG00000184371	4.17129	5.17846	0.523599	4.31738
ENSG00000168710	27.6131	38.3299	19.5806	26.9012
ENSG00000143093	15.4592	19.2198	35.0904	19.0233
ENSG00000156150	0.352844	0.107868	0.284704	0.210945
ENSG00000186150	0.026897	0.169592	0.114591	0.0663307
ENSG00000197106	0.10471	0.00503025	1.78121	0.0560716
ENSG00000116396	2.46219	1.6896	0.940935	1.42189
ENSG00000162775	32.3266	42.4954	21.5287	35.8013
ENSG00000168679	0.05021	0.047488	0.0401085	0.0185734
ENSG00000134248	11.753	12.3089	6.82637	7.10233
ENSG00000143125	0.0594227	0.0124892	0.0158226	0.0586169
ENSG00000143105	0	0	0	0
ENSG00000177301	0.0386459	0.0284284	1.04104	0.179491
ENSG00000177272	0.487444	0.279701	0.453244	1.45014
ENSG00000143119	0.0573372	0	0	0
ENSG00000121931	0.938677	2.57049	2.34449	1.53242
ENSG00000156171	2.22966	4.31874	2.19262	3.6303
ENSG00000134255	0.748957	1.25334	1.47965	1.45663
ENSG00000162777	0.219853	0.0787802	0.00383873	0.0177764
ENSG00000064886	0.0120649	0.0355003	0.0385504	0.0357038
ENSG00000134216	0	0	0	0.00423302
ENSG00000173947	0.699727	0.411782	0.0149054	0.556792
ENSG00000085465	1.719	2.68201	2.02057	2.87198
ENSG00000116455	9.82153	5.47484	2.95105	6.29113
ENSG00000116459	10.288	14.3247	9.13659	9.67327
ENSG00000143110	0.129257	0.144889	0.0994284	0.368346
ENSG00000121933	0	0	0	0
ENSG00000282608	0	0	0	0
ENSG00000116473	0.732988	1.04214	1.40449	1.24761
ENSG00000197852	2.07838	11.4904	3.57377	4.92192
ENSG00000064703	3.65241	3.27047	2.55356	2.86993
ENSG00000171385	0.0227511	0.652438	1.33006	0.0174554
ENSG00000143079	6.16388	9.33927	16.3955	9.4038
ENSG00000134245	0.0807039	0.76628	2.71353	0.85229
ENSG00000007341	1.33803	2.36102	2.36998	2.08378
ENSG00000116489	2.79624	3.66983	3.7779	3.42298
ENSG00000155363	21.0098	13.0187	4.13069	20.3544
ENSG00000155366	10.1605	9.10199	1.8816	3.04235
ENSG00000271810	0.0184387	0	0	0
ENSG00000155367	4.9796	0.366305	0.434609	0.566253
ENSG00000184599	0.0310092	0.22159	0.346788	0.0611774
ENSG00000155380	44.6557	22.5302	7.11798	22.874
ENSG00000198799	2.6011	2.29407	3.08823	2.665
ENSG00000081026	3.93164	5.26237	7.08879	5.25899
ENSG00000116793	4.61299	5.26485	7.32556	10.0881
ENSG00000081019	2.04336	3.99444	5.95161	3.18019
ENSG00000134242	0	0	0.00470144	0
ENSG00000188761	0.00935163	0.0511024	0.134464	0.0691861
ENSG00000134262	1.66597	1.64957	2.13717	2.52715
ENSG00000118655	3.90475	5.57299	3.56246	7.09647
ENSG00000163349	8.23992	8.44168	7.40971	6.49494
ENSG00000116774	54.931	1.14918	0.292681	2.23111
ENSG00000134207	16.3681	0.58932	2.14858	1.53663
ENSG00000197323	4.8187	5.79648	10.6096	5.95348
ENSG00000116752	12.6698	11.5906	14.4723	8.98104
ENSG00000175984	0.785638	0.00450843	0.0257029	0.0476099
ENSG00000116748	0	0	0	0.00778997
ENSG00000213281	5.2049	3.45928	2.63621	4.45562
ENSG00000009307	41.178	52.9397	43.6273	49.5376
ENSG00000052723	3.87825	4.22157	3.18242	3.78242
ENSG00000198765	0	0	0	0
ENSG00000134200	0	0	0	0
ENSG00000134198	1.46308	0.181316	1.73214	0.620995
ENSG00000134259	0.436646	0.111722	0.545947	0.280908
ENSG00000173218	6.47502	1.14145	1.01391	0.807056
ENSG00000118729	0	0.0603484	0.0611646	0.00708102
ENSG00000177551	0.305758	0.680297	1.20718	0.026001
ENSG00000163393	0.691109	0.233669	0.780096	0.0259357
ENSG00000173212	0.0671517	0.0461899	0.299093	0.114416
ENSG00000163399	53.1702	23.9806	14.2343	29.1856
ENSG00000116815	0.624288	0.702909	0.249345	0.813766
ENSG00000143061	25.5714	9.05528	20.1121	10.6595
ENSG00000116824	0	0.00995264	0	0
ENSG00000134247	18.8662	21.6405	10.4786	17.8787
ENSG00000134256	0.555598	0.257555	0.851691	0.875877
ENSG00000116830	10.7633	6.18621	1.35578	7.40885
ENSG00000134253	8.13642	8.04919	2.59786	7.93631
ENSG00000134258	0.0262661	0.160094	0.139878	0.0518199
ENSG00000198162	1.12678	2.9905	3.66385	2.22502
ENSG00000183508	0.286869	0.110415	0.165654	0.102281
ENSG00000196505	0.702585	1.07625	1.45629	1.16568
ENSG00000065183	2.16276	2.07682	1.40107	2.79751
ENSG00000155761	0.0561847	0.0507333	0.141847	0.0533701
ENSG00000092607	0.130563	0.263434	0.400495	0.345164
ENSG00000116874	1.9324	2.9972	1.54638	2.77775
ENSG00000116882	0.0529486	0.0801249	0	0.156692
ENSG00000203859	0.0510537	0	0.00906276	0.0251807
ENSG00000203857	0	0	0	0
ENSG00000143067	7.28675	14.8475	35.9619	4.88531
ENSG00000092621	139.092	159.84	36.6249	62.1492
ENSG00000134240	0.0309248	0	0.0164688	0
ENSG00000134193	0	0	0	0
ENSG00000134249	0	0.00563972	0	0
ENSG00000134250	12.1409	14.6878	4.77737	20.8652
ENSG00000265808	2.15183	2.93183	3.51984	2.53936
ENSG00000273136	2.8372	4.43249	2.00756	6.1273
ENSG00000263353	0	0	0	0
ENSG00000281741	0.127884	0.0767945	0.0972914	0.0540644
ENSG00000198019	0	0	0	0
ENSG00000188610	3.46027	6.56188	1.27736	3.34224
ENSG00000171943	1.57688	3.20907	2.1631	3.60447
ENSG00000203818	0	0	0	0
ENSG00000263513	0.0692273	0.203698	0	0.128041
ENSG00000271567	0	0	0	0
ENSG00000266338	5.75404	14.0682	6.49961	17.8373
ENSG00000279782	0	0	0	0
ENSG00000196369	2.43032	4.54627	2.65877	6.35137
ENSG00000215784	0.165848	0.292799	0.070657	0.106339
ENSG00000281571	3.17884	3.67078	2.89928	2.66718
ENSG00000256374	0	0	0	0
ENSG00000162825	0.358925	1.04776	1.20704	1.22217
ENSG00000117262	1.06234	1.44942	1.4515	1.64777
ENSG00000174827	2.70101	0.067381	0.119511	0.0553433
ENSG00000117281	0	0.033665	0.0053313	0.0839398
ENSG00000265491	2.14773	2.00235	3.94228	2.55192
ENSG00000186141	4.31271	5.00178	4.99514	5.86185
ENSG00000186364	2.32717	2.95484	6.17103	3.68008
ENSG00000131788	16.2945	10.381	7.07596	13.5395
ENSG00000198483	2.97296	0.327949	0.119608	1.13691
ENSG00000143127	0.113223	0.0766779	0.341677	0.0682534
ENSG00000131779	2.69279	3.14572	4.16962	3.01898
ENSG00000265241	49.1637	44.5184	45.188	33.3027
ENSG00000280778	0	0	0	0
ENSG00000271601	5.85056	8.25645	8.96355	5.99812
ENSG00000272031	0.605443	0.608976	1.64667	0.133311
ENSG00000121851	0.629785	1.10536	1.72989	0.926418
ENSG00000265972	4.77594	7.26042	5.25615	15.7129
ENSG00000168509	0.0822039	0	0	0
ENSG00000271425	0.324551	0.858786	0.524088	1.01356
ENSG00000213240	0	0	0	0
ENSG00000264343	0.459671	0.809199	0.335155	2.31892
ENSG00000270339	0	0	0	0
ENSG00000268043	5.15783	2.88849	4.63762	3.72356
ENSG00000131791	4.69619	7.63296	3.02049	4.04716
ENSG00000131781	0.544573	0.0865394	0.0884172	0.042582
ENSG00000131778	27.9254	20.9723	10.6229	30.2125
ENSG00000116128	30.3974	20.1307	37.5828	41.5358
ENSG00000162836	2.80038	2.22434	0.918691	2.30993
ENSG00000265107	2.75934	1.55836	0.0385855	0.16677
ENSG00000121634	0	0.0513379	0.813003	0
ENSG00000188092	0.892779	2.1477	1.56835	1.12086
ENSG00000263956	7.1359	3.81304	5.83464	5.23896
ENSG00000280649	3.17504	4.84888	3.92196	3.02079
ENSG00000236334	0.12887	0.00866726	0.0274515	0.0406792
ENSG00000270629	1.21237	2.67566	1.05539	4.22377
ENSG00000178104	1.50752	1.15969	5.57948	2.21819
ENSG00000269713	2.96198	8.28689	5.06915	11.2386
ENSG00000271383	0.985115	1.43932	0.626609	2.77227
ENSG00000263464	0	0	0	0
ENSG00000272058	0	0	0.0374259	0
ENSG00000150337	0	0	0	0
ENSG00000203814	130.276	222.235	88.8225	192.57
ENSG00000183598	680.022	179.384	166.068	358.657
ENSG00000270882	0.0741675	0.017815	0.0902798	0.0104517
ENSG00000203811	0	0.191727	0	0.0236804
ENSG00000203812	0.181028	0.669637	0.0385621	0.142859
ENSG00000272196	290.858	341.854	97.2572	212.517
ENSG00000203852	0.0720177	0.131181	0	0
ENSG00000270276	0.257606	0.866277	0.636545	0.772503
ENSG00000184678	162.259	332.344	106.528	248.202
ENSG00000184260	678.974	1521.17	631.59	815.163
ENSG00000184270	730.337	726.247	185.041	421.932
ENSG00000178096	6.48958	5.03259	3.01402	3.0733
ENSG00000159164	21.7805	28.1868	75.8438	16.4858
ENSG00000143368	44.7651	38.0433	33.9107	36.9177
ENSG00000014914	1.7881	1.31398	0.908432	0.866977
ENSG00000264522	7.2802	11.6892	8.45816	8.47768
ENSG00000136631	1.76169	1.96672	3.1712	1.56871
ENSG00000023902	9.22845	15.8934	27.4686	16.3639
ENSG00000143401	34.99	46.1497	18.3576	30.4635
ENSG00000118298	11.3464	22.4957	9.72091	20.4002
ENSG00000117362	37.3615	31.2943	21.6644	31.1753
ENSG00000118292	1.94208	4.95996	1.36332	8.05483
ENSG00000159208	2.25606	2.34294	0.651766	5.94184
ENSG00000266472	16.3763	13.7472	15.4683	24.5421
ENSG00000278939	0	0	0	0
ENSG00000117360	14.7421	16.3093	13.0972	18.2973
ENSG00000163125	7.52037	12.5109	16.3565	13.2189
ENSG00000143374	19.5356	15.3497	14.794	15.6734
ENSG00000143369	1.36654	0.934991	2.4636	0.922013
ENSG00000143382	3.36844	2.11999	0.345602	0.128033
ENSG00000143384	38.9625	34.262	37.1878	35.9177
ENSG00000143420	41.1144	28.0485	26.3852	27.5781
ENSG00000143457	6.6933	2.92145	2.13042	3.90498
ENSG00000143452	0	0	0	0
ENSG00000163131	0.00470125	0	0.170246	0.009275
ENSG00000143387	5.62494	0.469346	2.32237	1.01829
ENSG00000143437	5.7593	5.86508	6.80344	6.60199
ENSG00000283324	0	0.0135968	0	0
ENSG00000143379	13.9976	16.8895	16.6935	14.7394
ENSG00000143418	22.5049	19.3948	9.07637	18.231
ENSG00000143412	1.55662	0.0457571	0.127534	0.214757
ENSG00000143409	6.26395	9.16609	15.6993	9.71578
ENSG00000143363	9.54584	6.05571	6.75966	5.15949
ENSG00000163141	2.24062	0.398694	0.600273	0.657646
ENSG00000143443	3.90546	3.51271	4.55926	2.70852
ENSG00000197622	26.4044	27.1865	26.7365	22.9862
ENSG00000213190	8.12148	14.1188	55.2358	11.0619
ENSG00000143458	1.26326	2.0113	1.64038	2.09964
ENSG00000143434	12.941	9.72309	48.3983	15.1215
ENSG00000163154	0.0506203	0	0.179717	0
ENSG00000163156	8.00555	11.1216	8.80542	7.44059
ENSG00000163155	5.65081	8.9549	13.0164	6.25434
ENSG00000163157	0	0	0	0
ENSG00000163159	21.1189	27.7368	26.5226	24.0638
ENSG00000143398	18.5971	19.3044	15.9181	17.8552
ENSG00000159352	77.577	75.6195	77.5906	53.7178
ENSG00000143373	29.7011	17.508	18.0595	15.7069
ENSG00000143393	14.8676	18.9831	24.364	18.0261
ENSG00000143390	21.6193	20.6276	19.0702	24.9859
ENSG00000143416	10.4773	9.96716	1.90318	22.1086
ENSG00000159377	93.204	60.0122	36.4943	53.743
ENSG00000143442	17.0459	22.0155	27.8112	23.278
ENSG00000143375	24.1311	3.6068	2.03194	6.41032
ENSG00000143367	5.83801	4.15823	8.45077	5.20773
ENSG00000143376	7.65315	6.12964	9.48098	6.40187
ENSG00000159409	0.1209	13.0175	125.602	4.4524
ENSG00000178796	0.0527472	0.229113	1.11424	0.121408
ENSG00000143436	16.6847	17.4851	9.17159	12.2167
ENSG00000143450	0.253127	0.0685299	0.228476	0.105803
ENSG00000182134	2.53341	1.99528	2.39895	1.68272
ENSG00000213171	0	0.00494539	0	0
ENSG00000143365	0.0813427	0	0.00346548	0.0192575
ENSG00000225556	0.95029	0.0285324	0.0481972	0.0334787
ENSG00000196407	0	0	0	0
ENSG00000159445	1.58472	1.27517	2.56073	1.04513
ENSG00000197747	19.3616	0.595643	0.0274408	1.00388
ENSG00000163191	115.286	2.82604	0.466999	3.46012
ENSG00000182898	0	0	0	0
ENSG00000159450	0	0.00477784	0.0998756	0
ENSG00000215853	0	0	0	0
ENSG00000197915	0	0	0	0
ENSG00000143631	0	0.00786561	0	0
ENSG00000143520	0	0	0	0
ENSG00000143536	0	0	0	0
ENSG00000186207	0	0	0	0
ENSG00000279850	0	0	0	0
ENSG00000169509	0	0	0	0
ENSG00000185966	0	0	0	0
ENSG00000163202	0	0	0	0
ENSG00000244057	0	0	0	0
ENSG00000187238	0	0	0	0
ENSG00000185962	0	0	0	0
ENSG00000187223	0	0	0	0
ENSG00000187180	0	0	0	0
ENSG00000159455	0	0	0	0
ENSG00000187173	0	0	0	0
ENSG00000187170	0	0	0	0
ENSG00000198854	0	0	0	0
ENSG00000203786	0	0	0	0
ENSG00000240386	0	0	0	0
ENSG00000186226	0	0	0	0
ENSG00000172155	0	0	0	0
ENSG00000197084	0	0	0	0
ENSG00000196734	0	0	0	0
ENSG00000186844	0	0	0	0
ENSG00000235942	0	0	0	0
ENSG00000163206	0	0	0	0
ENSG00000163207	0	0	0	0
ENSG00000283227	0	0	0	0
ENSG00000184148	0	0	0	0
ENSG00000169474	0	0	0	0
ENSG00000163209	0.206907	0.0579823	0	0.0136068
ENSG00000169469	0	0.0269524	0	0
ENSG00000163216	0.0752201	0	0	0
ENSG00000241794	0	0	0	0
ENSG00000196805	0	0	0	0
ENSG00000203785	0	0	0	0
ENSG00000244094	0	0	0	0
ENSG00000159516	0	0	0	0
ENSG00000203784	0	0	0	0
ENSG00000203783	0	0	0	0
ENSG00000203782	0	0	0	0
ENSG00000159527	0	0	0	0
ENSG00000163218	0	0	0	0
ENSG00000163220	0	0	0	0
ENSG00000163221	0	0	0	0
ENSG00000143546	0	0	0	0
ENSG00000184330	0	0	0	0
ENSG00000197364	0	0	0	0
ENSG00000143556	0	0	0	0
ENSG00000197956	0.75741	0.189305	0.130817	0.54521
ENSG00000196420	0	0.106572	0.0270033	0.175066
ENSG00000196154	10.5881	4.23876	0.433739	7.84294
ENSG00000188015	0	0.0174979	0	0
ENSG00000196754	0.241009	0.063984	0	0.0500507
ENSG00000188643	40.3381	1.61112	0.224028	1.97111
ENSG00000189334	16.4992	0.88983	0.116049	0.921254
ENSG00000189171	18.1727	6.89986	3.35329	4.49483
ENSG00000160678	0.150881	0.1103	0.013974	0.0517686
ENSG00000160679	29.0256	30.9137	25.3897	28.2241
ENSG00000143553	11.5863	12.7493	9.11817	11.6958
ENSG00000143621	52.8337	54.1681	29.8022	43.8049
ENSG00000169418	4.92651	0.557796	0.220042	0.188118
ENSG00000143624	19.4109	14.3374	14.3292	18.8362
ENSG00000279767	1.6592	0.66222	1.16028	0.628229
ENSG00000143554	10.251	5.97545	4.65986	3.92864
ENSG00000143614	8.19624	12.5035	15.9896	13.0065
ENSG00000198837	25.2917	14.4983	25.9273	8.01978
ENSG00000160741	14.1923	12.3108	15.3446	12.8056
ENSG00000143570	105.861	43.6061	19.7834	39.5214
ENSG00000143578	11.0131	6.38727	4.25016	4.88833
ENSG00000143543	33.7349	28.2045	29.619	21.4423
ENSG00000143545	39.7827	27.5957	7.25695	21.7456
ENSG00000177954	32.0005	82.7575	38.022	71.7347
ENSG00000143552	0.0303773	0.0482388	0.0215696	0.0432833
ENSG00000143549	39.6377	19.9952	12.4793	19.8364
ENSG00000163263	0.0513615	0.259077	0.820566	0.10133
ENSG00000143612	50.7469	65.9682	51.4014	48.0388
ENSG00000143569	44.7952	40.294	46.2943	47.5066
ENSG00000143575	34.4594	44.75	23.047	22.0458
ENSG00000143595	0	0.00729079	0.0184735	0
ENSG00000143515	17.3017	16.0948	21.3272	17.6523
ENSG00000160712	0.917917	0.0517914	0.0688955	0.0698852
ENSG00000169291	0.289641	0.0197968	0	0.00232287
ENSG00000163239	0.029382	0.0494028	0	0
ENSG00000160714	11.2449	10.5138	13.0453	10.9794
ENSG00000160716	1.03905	3.91386	25.9171	4.15974
ENSG00000160710	52.699	29.4053	30.859	35.3172
ENSG00000143603	0.42537	0.696782	1.55533	2.22345
ENSG00000163344	47.658	38.2122	30.8628	40.0878
ENSG00000163346	29.9366	13.916	7.40504	15.7785
ENSG00000163348	22.2205	25.0151	18.342	24.7117
ENSG00000160691	82.8219	14.0319	5.25608	23.4593
ENSG00000173207	44.6763	40.8185	5.23379	25.1927
ENSG00000160688	35.8269	25.8869	18.7686	24.6812
ENSG00000163352	0.353972	1.12166	1.13103	2.7128
ENSG00000160685	14.9435	6.66788	2.05654	5.80976
ENSG00000163354	0.524269	0.761794	0.413623	1.14286
ENSG00000163357	0.0249006	0.0209339	0	0.0736888
ENSG00000143537	8.22066	10.0887	4.58525	18.0498
ENSG00000243364	20.5694	22.6643	7.96202	19.5608
ENSG00000251246	0	0	0	0
ENSG00000143590	2.45728	7.6856	25.662	5.00198
ENSG00000169242	2.45819	0.743712	0.733759	0.59463
ENSG00000169241	10.2018	5.96293	3.14845	5.91572
ENSG00000179085	30.2947	48.3315	20.8643	31.3655
ENSG00000163463	0.924749	0.842949	1.07347	0.717467
ENSG00000273088	0	0	0	0
ENSG00000163462	7.08605	3.03391	17.9668	5.38521
ENSG00000185499	1.25995	0.542019	1.56636	1.20961
ENSG00000279986	0	0.1103	0.48909	0
ENSG00000279487	2.03361	0.2206	1.11792	0.517686
ENSG00000169231	5.37446	20.7589	16.5454	16.3331
ENSG00000173171	11.6545	9.05364	7.13652	10.5155
ENSG00000177628	6.90897	4.00355	6.16315	5.58444
ENSG00000160767	17.2877	17.4847	15.0251	20.9765
ENSG00000116521	20.7641	23.745	21.8295	23.4774
ENSG00000176444	27.0315	18.9917	19.2958	28.2089
ENSG00000143630	2.87952	4.41585	16.9221	6.98937
ENSG00000143627	1.81458	0.0446804	0.105125	0.0224683
ENSG00000160752	57.813	67.8487	33.0257	55.6684
ENSG00000160753	12.3576	8.67701	21.4086	9.45503
ENSG00000116539	3.76989	6.0754	8.20681	6.23422
ENSG00000125459	9.59363	8.57365	6.55544	10.3069
ENSG00000163374	7.73057	9.44288	10.2869	8.60983
ENSG00000132676	11.4418	11.3783	7.7521	11.7439
ENSG00000116580	9.62037	9.23287	11.1948	10.9006
ENSG00000132718	1.15316	12.316	50.2681	5.59408
ENSG00000143622	4.69154	5.27879	4.26761	4.93311
ENSG00000132680	11.0866	9.63485	8.23907	9.86109
ENSG00000173080	0	0.0269524	0.273169	0.158124
ENSG00000116584	20.0531	20.7788	23.3444	17.6048
ENSG00000163479	18.5978	18.6476	14.2793	19.2241
ENSG00000160803	31.107	40.3758	40.8399	41.5809
ENSG00000116586	42.4492	22.6835	21.7595	26.7794
ENSG00000132698	28.8736	0.698319	0.386279	1.52335
ENSG00000254726	46.797	66.2198	102.299	73.4091
ENSG00000160789	14.8202	16.543	35.0944	20.8284
ENSG00000196189	4.83374	0.426213	2.61607	0.939842
ENSG00000160785	7.28247	4.74071	10.2761	5.07592
ENSG00000260238	0.0394775	0	0.0210234	0
ENSG00000160783	15.0102	7.32078	6.10755	7.22049
ENSG00000242252	1.23604	1.22169	1.24533	1.66415
ENSG00000160781	15.4109	9.16713	13.9141	16.5766
ENSG00000198952	62.5388	47.4188	39.7308	46.6155
ENSG00000163472	1.52949	2.63162	2.73347	2.10969
ENSG00000198715	16.4868	5.32463	2.37262	13.9528
ENSG00000189030	0.0588074	1.45846	2.12959	0.17403
ENSG00000163468	130.822	118.928	56.6991	90.9658
ENSG00000163467	1.06961	0.194831	0.0189871	0.0175851
ENSG00000132677	1.29849	0.00493955	0	0.0115917
ENSG00000125462	1.55283	0.115348	0.510611	0.00636913
ENSG00000116604	8.61229	5.6659	14.2174	7.6438
ENSG00000183856	20.3339	23.006	5.53915	18.1561
ENSG00000187862	0.0351306	0	0	0.0207925
ENSG00000163382	38.1394	25.7357	23.8648	23.0663
ENSG00000160818	21.3821	13.1364	5.84494	14.932
ENSG00000280316	0.797354	1.54017	3.18469	2.48135
ENSG00000132702	0.76279	1.47643	3.23086	2.73856
ENSG00000132692	1.26171	0.369386	0.334883	0.974204
ENSG00000132688	127.726	499.303	350.435	543.746
ENSG00000143320	271.663	1247.13	316.289	511.948
ENSG00000143319	10.8224	8.45686	10.0381	9.75151
ENSG00000143303	16.6341	16.3625	13.4813	19.3537
ENSG00000143314	18.4931	19.5005	8.93037	16.4841
ENSG00000143321	147.137	126.344	77.0452	115.78
ENSG00000143294	29.0315	19.5742	26.3396	19.6312
ENSG00000027869	3.9643	0.419093	0.00842779	0.788353
ENSG00000198400	0.228155	3.18021	1.20531	1.76448
ENSG00000027644	0.14028	0.0950018	0.356925	0.0807203
ENSG00000187800	0.675743	0.057414	0.00765664	0.134734
ENSG00000160838	0.0831037	0	0.0241398	0
ENSG00000132694	24.2876	22.2053	33.5063	27.7701
ENSG00000253831	0.553254	0.0253702	0.0214277	0.00992275
ENSG00000117036	10.2719	8.77506	7.705	8.27619
ENSG00000143297	0.0496162	0.00134556	0	0
ENSG00000163518	0	0	0	0
ENSG00000160856	0	0.0025559	0	0
ENSG00000132704	0	0	0.00418557	0
ENSG00000163534	0	0	0	0
ENSG00000073754	0	0	0	0
ENSG00000183853	16.3747	22.9663	14.8748	26.0784
ENSG00000158473	2.17914	0.014834	0	0.0174056
ENSG00000158477	0	0	0	0
ENSG00000158481	0	0	0	0
ENSG00000158485	0	0	0	0
ENSG00000158488	0	0	0	0
ENSG00000186306	0	0	0	0
ENSG00000180708	0	0	0	0
ENSG00000173285	0	0	0	0
ENSG00000198965	0	0	0	0
ENSG00000197532	0	0	0	0
ENSG00000186440	0	0	0	0
ENSG00000198967	0	0	0	0
ENSG00000163554	0	0	0	0
ENSG00000196171	0	0	0	0
ENSG00000203757	0	0	0	0
ENSG00000180433	0	0	0	0
ENSG00000197403	0	0	0	0
ENSG00000188340	0	0	0	0
ENSG00000163563	0	0	0	0
ENSG00000163564	0	0	0	0.00563592
ENSG00000163565	0.225277	0.719681	0.0879776	0.844442
ENSG00000163568	0.257242	1.47225	0.969485	1.70796
ENSG00000162706	2.14941	43.1945	173.954	4.75531
ENSG00000213088	0.0377529	2.96758	19.5421	0.186205
ENSG00000179639	0	0	0	0
ENSG00000196266	0	0	0	0
ENSG00000196184	0	0	0	0
ENSG00000184155	0	0	0	0
ENSG00000132703	0	0	0	0
ENSG00000132693	0	0	0.0105065	0
ENSG00000158716	22.4549	9.51991	2.33518	7.15371
ENSG00000181036	0	0.00625627	0	0
ENSG00000158714	0	0	0	0
ENSG00000188004	0.0158952	0	0.0253946	0.00783981
ENSG00000243284	0.0109334	0	0.011645	0.0323554
ENSG00000256029	0	0	0	0
ENSG00000213085	0.128727	0.0127318	0.00806499	0.0149389
ENSG00000158710	44.1815	6.6721	1.50671	4.62787
ENSG00000085552	8.60692	13.859	19.4905	15.0073
ENSG00000162723	0	0	0.0183137	0
ENSG00000177807	0.103613	0.118016	0.566021	0.0197821
ENSG00000143315	2.00656	4.84794	8.10257	2.97356
ENSG00000162728	0.0953328	0.589075	5.15811	0.032914
ENSG00000162729	45.9883	12.2814	19.7903	20.0537
ENSG00000018625	20.7701	7.16391	0.689104	177.229
ENSG00000132681	0.0822405	0.117005	0.0101069	1.36041
ENSG00000143318	0.429326	0.13823	0.0291874	1.30656
ENSG00000162734	35.3406	40.5554	36.0112	46.7753
ENSG00000132716	6.72257	7.42909	6.93967	6.62624
ENSG00000258465	0.0276548	0.0116247	0.0147274	0.0136399
ENSG00000162735	5.64983	5.95599	3.03251	4.09201
ENSG00000122218	22.2818	23.6499	19.0984	14.2745
ENSG00000162736	18.1582	24.9437	16.2215	23.1437
ENSG00000171786	0.488585	47.2301	27.8448	12.508
ENSG00000162738	45.1399	154.009	133.89	119.014
ENSG00000162739	0.00723849	0	0	0
ENSG00000066294	0	0	0	0
ENSG00000117090	0.0186244	0	0	0
ENSG00000117091	0.042498	0	0	0
ENSG00000026751	0	0	0	0
ENSG00000122224	0	0	0	0
ENSG00000122223	0	0	0	0
ENSG00000179914	0	0	0	0
ENSG00000158764	5.61316	0.653711	0.659964	0.0359548
ENSG00000158769	9.45192	2.29909	0.137906	2.36093
ENSG00000270149	0.0846226	0.0395234	0.020029	0.05565
ENSG00000215845	23.9508	2.5411	1.18975	4.55344
ENSG00000158773	31.6533	39.7089	57.2676	34.5899
ENSG00000186517	0.105979	0.0395983	0.0292643	0.00774382
ENSG00000278883	0	0	0	0
ENSG00000143217	0.238387	0.176553	0.0302264	0.0279945
ENSG00000162755	2.94687	2.46771	3.96333	1.12856
ENSG00000143256	58.5737	84.0461	64.7314	56.7078
ENSG00000158793	11.4293	10.8995	7.57967	9.77008
ENSG00000158796	13.7609	9.91019	11.4221	9.32062
ENSG00000143222	17.5518	13.4551	8.68609	17.7708
ENSG00000143258	13.4291	17.4963	13.6113	13.9919
ENSG00000143224	8.7498	7.8166	8.42321	8.68648
ENSG00000158850	15.4774	15.4733	14.6942	14.9853
ENSG00000158859	1.6157	0.0436601	0.0491673	0.383267
ENSG00000158864	33.0865	29.5106	23.1731	29.6576
ENSG00000158869	0.927864	0.884061	1.51532	0.528829
ENSG00000158874	43.2244	0.778054	4.77179	0.684701
ENSG00000158882	11.1597	6.02095	10.7522	5.83379
ENSG00000143257	0.0180426	0.0252806	0.0256225	0.0118653
ENSG00000248485	0.725842	0.105614	0.773084	0
ENSG00000158887	1.43032	1.22575	1.18925	1.0013
ENSG00000143252	2.93381	4.22129	3.35799	3.56699
ENSG00000188931	0.0770422	0.0431795	0.382931	0
ENSG00000143226	0.0112214	0.0188677	0.00398393	0
ENSG00000173110	0.00838334	18.7826	2.50011	0.0826966
ENSG00000203747	0	0	0	0
ENSG00000162747	0.00646824	0	0	0
ENSG00000072694	0.0149428	0	0	0
ENSG00000132185	0	0.0357171	0.00646431	0.00598698
ENSG00000162746	0.0306742	0.244984	0.212359	0.0983394
ENSG00000081721	8.72011	15.506	18.3591	11.7622
ENSG00000118217	2.13381	4.62556	3.81017	3.68787
ENSG00000162745	4.20238	6.30741	2.99426	6.28124
ENSG00000198929	2.98755	5.5888	6.35581	13.0749
ENSG00000254706	0	0	0	0
ENSG00000239887	4.80229	9.63223	4.02689	20.7546
ENSG00000171722	0.0213271	0	0.0113576	0.0525948
ENSG00000198574	0	0	0	0
ENSG00000152332	2.41851	4.23817	2.69269	2.71441
ENSG00000117143	3.57402	3.5638	3.31387	4.55813
ENSG00000162733	0.0518689	0.113687	0.0512988	0.102331
ENSG00000132196	2.56896	3.68733	1.9302	2.78611
ENSG00000185860	0	0	0	0
ENSG00000117152	0.0534325	0.224603	0.468415	0.0648713
ENSG00000143248	2.70135	0.0416476	0.0310374	0.13223
ENSG00000143228	4.22133	8.90696	2.82737	4.8581
ENSG00000185630	9.71535	26.5328	37.6127	9.11116
ENSG00000162761	0.417961	0.0359365	0.0758803	0.140555
ENSG00000143171	1.03956	0.49586	17.5977	0.101819
ENSG00000162763	0	0	0	0
ENSG00000143198	2.39204	2.18205	3.61621	3.1088
ENSG00000143149	12.4441	5.44051	2.09914	7.8299
ENSG00000143183	3.10755	3.87537	3.37425	3.5289
ENSG00000143179	21.957	19.827	12.5219	25.2318
ENSG00000188859	0.546866	0.747484	1.63247	0.873395
ENSG00000143157	14.3289	19.4382	18.5393	18.4863
ENSG00000152382	1.71734	2.50403	1.45758	2.32932
ENSG00000143195	0.28776	4.49176	1.20918	26.5922
ENSG00000143194	0	0.037158	0.0067251	0.355025
ENSG00000143167	0.130442	0.0522203	0.198474	0.0674003
ENSG00000198842	0.124692	0	0.00983764	0.0182224
ENSG00000143190	9.15046	9.82708	9.99062	10.9768
ENSG00000198821	0.339987	0.132557	0.0419843	0.262468
ENSG00000143162	3.15013	3.48757	3.48118	4.24534
ENSG00000198771	0.337191	0.00292244	0	0.061723
ENSG00000197965	8.29774	9.69203	8.40954	10.5762
ENSG00000143199	0.0388537	0.0408303	0.155184	0.0351329
ENSG00000143158	5.84156	6.10928	5.69084	4.90952
ENSG00000143164	2.41763	1.53431	1.89011	2.32577
ENSG00000143147	5.17819	9.83215	14.6199	11.5925
ENSG00000143155	3.926	5.69298	5.8778	3.83013
ENSG00000213064	4.13977	4.53913	2.3961	5.86071
ENSG00000143178	0.419666	0.57733	0.092879	0.774187
ENSG00000143185	0.0351804	0	0	0
ENSG00000143184	0.785188	0.366726	0.232304	0.889287
ENSG00000143196	0	0	0	0
ENSG00000143153	6.02615	7.26077	17.3039	3.92544
ENSG00000143156	0.270245	0.533034	0.811841	0.851008
ENSG00000117475	0.457897	0.485566	0.770344	0.934172
ENSG00000117477	0.255926	0.531563	0.769646	0.994971
ENSG00000117479	1.88427	2.63107	1.48212	2.09907
ENSG00000198734	0	0.00466904	0	0.0164353
ENSG00000174175	0	0	0	0
ENSG00000000460	0.969361	1.41704	0.741521	1.44582
ENSG00000188404	0	0	0	0
ENSG00000007908	0	0	0	0
ENSG00000171806	0.957316	1.27076	0.872046	1.5159
ENSG00000000457	0.73062	0.937127	1.14419	0.83181
ENSG00000075945	0.547034	1.29239	7.45096	0.961068
ENSG00000203740	0.214618	0.263704	0.0703342	0.618837
ENSG00000120370	0.96408	1.35083	0.914606	1.02896
ENSG00000116132	0.672527	0	0.00770214	0.0879787
ENSG00000117501	0	0	0	0
ENSG00000007933	0	0	0	0
ENSG00000094963	0	0	0	0
ENSG00000010932	0.00551829	0	0	0
ENSG00000076258	0.0157941	0	0	0.0701097
ENSG00000117523	24.5331	28.8919	26.0614	32.9864
ENSG00000283683	0.0450894	0.0126355	0.488245	0.111195
ENSG00000034971	0	0.00797637	0	0
ENSG00000117533	0.281259	0.595993	0.586818	0.680309
ENSG00000010165	23.3412	11.5624	8.15403	14.1458
ENSG00000197959	0.0526354	0.278779	5.08849	0.244032
ENSG00000135845	1.46842	1.71422	2.1515	1.54983
ENSG00000180999	0	0	0	0
ENSG00000094975	2.5356	3.64947	3.11364	2.90856
ENSG00000117560	0	0	0	0
ENSG00000120337	0.00989885	0	0.0105431	0
ENSG00000117586	0.0605081	0.0678254	0	0.149219
ENSG00000117592	31.3311	33.1951	7.96916	28.9182
ENSG00000162753	0.0161732	0.016996	0.0129194	0.00797695
ENSG00000183831	0.116079	0.143512	0.101817	0.0808273
ENSG00000232113	0	0	0	0
ENSG00000076321	2.23346	5.27162	4.65315	3.65967
ENSG00000120334	3.81035	4.11811	1.78791	4.22153
ENSG00000117593	3.96029	3.51967	1.30272	2.1845
ENSG00000185278	2.57754	3.64104	2.78446	3.03015
ENSG00000117601	0.0449704	0.0283549	0.0478973	0.0776309
ENSG00000135870	2.19703	3.57211	4.98359	3.5388
ENSG00000152061	3.99616	1.28414	3.56993	2.02528
ENSG00000203737	0.091346	0.168948	0.155666	0.396472
ENSG00000116161	11.1304	8.64974	6.13389	7.51956
ENSG00000120333	0.965493	1.75222	2.10563	1.57978
ENSG00000120332	0.273863	0.0567249	0.0845471	0.0274064
ENSG00000235750	2.58903	0.0349372	0.150491	0.0204969
ENSG00000116147	0.228523	0.202434	5.58995	0.016642
ENSG00000143207	4.80393	6.9423	10.9079	6.04321
ENSG00000116183	0.267329	0.680345	0.391259	0.22962
ENSG00000152092	1.4474	11.1076	30.3489	3.9935
ENSG00000198797	0.0301698	0.274774	6.79623	0.153764
ENSG00000120341	0.0134722	0.00226521	0.00286981	0.00531581
ENSG00000075391	4.13173	4.31823	6.68344	4.38489
ENSG00000188585	0	0	0	0
ENSG00000240021	0	0	0.00524284	0
ENSG00000116191	2.24368	3.60683	2.42431	3.98214
ENSG00000116194	0	0	0.0248846	0
ENSG00000116199	8.48529	6.61612	6.37327	8.88646
ENSG00000186283	13.5997	7.88383	3.72391	7.84895
ENSG00000143322	4.97035	7.39159	7.46568	9.4672
ENSG00000057252	1.31378	3.1274	1.58364	2.89422
ENSG00000162779	0.0130576	0.0246994	0.0347686	0.0386415
ENSG00000116218	0	0	0	0
ENSG00000162782	0.00934065	0.00392634	0	0.00921398
ENSG00000143340	0.0819948	1.55673	15.9453	0.175246
ENSG00000169905	2.89055	2.31323	2.82746	2.28005
ENSG00000143337	1.33546	1.19919	1.46642	1.20112
ENSG00000135837	1.83466	3.27643	3.90815	3.01219
ENSG00000116260	18.0709	5.6587	14.1289	7.46516
ENSG00000121454	0.06231	4.4168	23.682	0.0711701
ENSG00000230124	8.7742	9.97023	11.0249	9.97073
ENSG00000143324	3.40473	8.94742	30.1758	5.97052
ENSG00000135835	1.162	0.403215	1.25632	0.790449
ENSG00000135823	8.28588	8.37459	11.9369	6.77796
ENSG00000153029	0.0212633	0.0053628	0.0226472	0.0188774
ENSG00000162783	7.60334	25.0897	13.5375	18.0905
ENSG00000198216	1.54913	1.52709	3.35113	1.69803
ENSG00000179930	0.359516	0.0228973	0.0174053	0.198814
ENSG00000135821	34.5447	86.4275	25.453	57.8126
ENSG00000203730	0	0	0	0
ENSG00000121446	0	0	0.00233594	0
ENSG00000135828	0.275843	0.392867	0.158996	0.358534
ENSG00000143333	5.07774	65.2996	9.34228	5.88948
ENSG00000135824	0.737393	1.33734	0.668212	0.190647
ENSG00000135838	0.643252	0.927054	0.63831	0.461118
ENSG00000135829	35.1517	38.9892	32.1441	38.4471
ENSG00000157060	0	0	0	0
ENSG00000135862	36.5923	25.2804	6.30635	17.5594
ENSG00000058085	3.39332	0.186438	0.0355917	0.0299669
ENSG00000157064	2.67984	1.08449	30.9626	0.867485
ENSG00000116698	12.3726	13.7429	19.1444	16.222
ENSG00000116701	0.0135771	0	0	0.013393
ENSG00000162704	3.66331	3.20714	3.97148	3.68376
ENSG00000143344	0.970427	4.86037	5.50715	5.39248
ENSG00000173627	0	0	0	0
ENSG00000198756	1.36833	9.08824	4.20628	19.8543
ENSG00000198860	2.26188	7.72253	2.70374	4.0852
ENSG00000116667	2.09984	5.42546	9.55967	5.56534
ENSG00000116406	2.61069	3.60804	5.09462	3.34159
ENSG00000135842	4.24034	0.866263	0.275633	0.117101
ENSG00000121481	3.18675	3.78273	4.75078	3.49014
ENSG00000121486	3.36038	3.27113	2.7357	2.58524
ENSG00000116668	0.431467	0.399832	0.579659	0.541693
ENSG00000116679	6.8688	8.67242	6.16775	9.72084
ENSG00000143341	1.27848	1.27179	0.0945778	1.89119
ENSG00000116690	0	0	0	0
ENSG00000047410	6.39923	8.53791	6.83116	8.79076
ENSG00000157181	2.25463	3.49554	3.21743	4.11114
ENSG00000279374	0	0	0	0
ENSG00000262180	0.494674	0.586001	1.12559	1.13119
ENSG00000116703	0	0	0	0
ENSG00000073756	0.00754485	0.00634294	0.00401795	0.0186063
ENSG00000116711	0	0.0464987	0.184092	0.190959
ENSG00000162670	0	0.0155918	2.99263	0.0503105
ENSG00000150681	0	0	0	0
ENSG00000253148	0	0	0	0
ENSG00000090104	0.00482801	0	0	0
ENSG00000127074	0.00335588	0	0	0
ENSG00000116741	1.67854	3.61157	3.26245	1.48739
ENSG00000116750	2.21418	2.15247	2.21209	2.05169
ENSG00000116747	4.90699	7.76591	7.75697	6.89338
ENSG00000023572	1.31595	1.23496	1.22232	0.950934
ENSG00000134371	4.29701	3.95594	2.68193	4.10685
ENSG00000162630	0.00607114	0.07656	0.931144	0.029944
ENSG00000162687	1.58455	3.45742	1.64892	3.62046
ENSG00000000971	0	0	0.00259921	0
ENSG00000116785	0.026334	0	0	0
ENSG00000276911	0	0	0	0
ENSG00000244414	0	0	0.00963614	0
ENSG00000134365	0	0	0	0
ENSG00000080910	0	0	0	0
ENSG00000134389	0	0	0	0
ENSG00000143278	0	0	0	0
ENSG00000066279	4.77569	7.7472	2.55294	6.23284
ENSG00000177888	0.299477	0.817764	0.84811	0.625182
ENSG00000134376	0	0.275859	0.762215	0.178795
ENSG00000213047	0.210768	0.227818	0.416902	0.20791
ENSG00000203724	0.74823	0.574337	0.935526	0.192544
ENSG00000143355	0.0380711	0.0112022	0	0
ENSG00000151414	0.485598	0.779924	0.748787	0.564806
ENSG00000151418	0	0	0	0
ENSG00000081237	0	0	0	0
ENSG00000116833	0.249809	0.307284	0.910232	0.0311269
ENSG00000162702	9.40447	8.93388	8.62826	7.57457
ENSG00000118193	2.57578	3.43533	0.989145	3.00429
ENSG00000118197	2.18335	2.75891	1.8992	3.01787
ENSG00000118200	1.55652	3.05116	8.52867	3.81709
ENSG00000170128	0	0	0.155666	0.0320382
ENSG00000163362	19.5758	16.1795	8.97981	20.6469
ENSG00000116852	11.4124	26.9004	115.236	10.6606
ENSG00000081248	0.109568	0.116497	0.0274586	0.082651
ENSG00000232237	0.176596	0.016496	0.0313484	0.00967787
ENSG00000116857	30.2088	30.0831	21.0733	24.4554
ENSG00000163395	0.0459354	21.3653	0.207932	1.64905
ENSG00000081277	0.070406	0	0	0.00315688
ENSG00000118194	0.271086	0.00690611	0	0.0810333
ENSG00000159166	12.1876	0.139174	0	0.0450485
ENSG00000159173	0.137374	0.0355353	0.011255	0.104239
ENSG00000174307	10.0271	36.6587	12.9736	10.4348
ENSG00000159176	0.629942	0.174911	0.121057	0.0266043
ENSG00000134369	7.77973	14.4234	31.6149	14.973
ENSG00000198700	15.6246	18.7441	28.3595	23.2688
ENSG00000198892	3.77957	0.803941	3.18893	1.44865
ENSG00000163431	1.2664	0.218823	0.346535	0.330822
ENSG00000134375	7.01604	4.58076	3.41092	4.18603
ENSG00000176393	28.2413	26.9894	14.7141	16.4625
ENSG00000163435	1.73035	0.260266	0.203139	0.209952
ENSG00000170075	0.117668	0.0126825	0.0257081	0.080358
ENSG00000143862	24.2146	17.4804	34.8377	14.3556
ENSG00000143851	0.0504831	0	0	0.00663981
ENSG00000133067	0.589845	0.12397	0	0.0385045
ENSG00000077152	6.383	10.3872	3.1408	5.56002
ENSG00000077157	2.23873	2.39764	4.88143	3.34653
ENSG00000143858	3.34179	1.99477	6.94158	1.28883
ENSG00000117139	22.1026	17.0712	29.6304	17.3048
ENSG00000183155	2.87929	2.0699	3.80722	2.47714
ENSG00000117153	10.0392	12.8104	6.62177	9.33447
ENSG00000159346	21.7818	14.7008	11.5036	11.3849
ENSG00000159348	4.48819	3.11652	5.09993	3.46524
ENSG00000163444	24.6857	16.7561	9.97532	14.2307
ENSG00000143847	7.02971	1.56139	1.16245	5.94866
ENSG00000122180	0.0260169	0.0109362	0.0138551	0.12832
ENSG00000163485	2.16744	1.53508	2.20243	0.968438
ENSG00000133055	0.0110121	0.0462894	0.0117289	0
ENSG00000133048	0.0816539	0	0.00621203	0.03452
ENSG00000133063	0.00514279	0.00216177	0.0136938	0.0177557
ENSG00000159388	8.46408	62.8113	23.2209	42.5715
ENSG00000122176	0.456388	0.0151455	0	0.93594
ENSG00000188783	0.238647	0.093046	0.0442052	0.450352
ENSG00000188770	0.628923	0	0.0155781	0.144278
ENSG00000058668	10.5202	6.61818	4.9981	12.7294
ENSG00000122188	0	0	0.00661995	0.00613113
ENSG00000058673	7.86879	12.2124	12.1	12.4173
ENSG00000257315	1.37034	1.84405	2.5056	2.66199
ENSG00000182004	9.30465	13.0374	8.84742	13.5948
ENSG00000143842	30.7369	55.5184	36.0243	45.9214
ENSG00000143845	6.84491	3.09772	6.47143	4.61685
ENSG00000143839	0.0802412	0.12528	0.0854638	0
ENSG00000170498	0.280351	0.0235691	0.0298598	0.0276549
ENSG00000174567	3.37697	0.0735497	0.76408	0
ENSG00000143850	6.01535	9.84888	82.4296	0.520423
ENSG00000158615	16.2567	20.5436	15.0831	13.4742
ENSG00000133056	9.6893	39.9337	44.0976	41.3454
ENSG00000198625	4.91867	6.61103	6.62735	9.52581
ENSG00000170382	6.64429	0.188254	1.05462	0.742049
ENSG00000163531	2.91552	11.2042	40.7746	2.18187
ENSG00000184144	0.156671	7.96475	7.72499	1.38182
ENSG00000174529	2.98452	4.11489	3.90989	4.32775
ENSG00000117222	7.31167	7.93786	8.34037	9.34956
ENSG00000133059	5.0604	5.64497	5.40499	6.34611
ENSG00000133069	4.60084	5.55445	12.9523	5.96436
ENSG00000163545	10.2533	19.1192	6.18937	24.8326
ENSG00000162873	0.620643	43.7191	51.7697	32.6843
ENSG00000186007	9.15657	9.11136	19.919	6.83895
ENSG00000117266	17.8837	1.58518	0.827485	12.3655
ENSG00000174514	0.0343297	0.0115444	0.098723	0.0440234
ENSG00000158711	1.67796	2.19788	0.882254	3.23936
ENSG00000158715	7.93036	5.81391	1.39536	21.3817
ENSG00000069275	45.9695	48.4032	24.4856	52.6877
ENSG00000117280	2.3246	2.32879	0.643517	3.23254
ENSG00000133065	10.3496	7.04748	6.49405	8.13349
ENSG00000162877	0.015208	0.0383561	0.0242968	0.0900108
ENSG00000174502	0.0317861	0	0	0.0139356
ENSG00000276600	0.0539254	0	0.0287176	0.0744718
ENSG00000196188	0.186044	0	0	0
ENSG00000263961	0.00558811	0.0375833	0.00595181	1.55999
ENSG00000198049	0.279833	0.0735173	0.102453	0.0258786
ENSG00000196550	0.46763	0.640502	0.408526	0.37836
ENSG00000266028	8.83714	12.7725	8.91259	21.1834
ENSG00000263528	6.95246	0.348227	0.117273	1.31371
ENSG00000266094	0.256439	0.22517	5.20768	0.126481
ENSG00000143486	7.407	11.1486	4.17426	8.63171
ENSG00000143479	0.612612	2.41268	1.00382	2.09647
ENSG00000162889	32.1916	52.6729	27.6051	38.9436
ENSG00000136634	0	0	0	0
ENSG00000142224	0	0	0	0
ENSG00000162891	0	0	0	0
ENSG00000162892	0	0	0	0
ENSG00000162894	0.0169309	0	0	0.050104
ENSG00000162896	0	0	0.0387031	0.00896131
ENSG00000162897	0	0.0188766	0	0
ENSG00000182795	0.946519	0.145784	0.0538692	0.0855283
ENSG00000123836	2.20465	1.02423	0.782712	0.996039
ENSG00000180667	1.76792	3.27496	2.30828	1.79205
ENSG00000123843	0	0	0	0
ENSG00000123838	0	0	0	0
ENSG00000196352	1.89559	0.69627	0.228132	0.947266
ENSG00000117322	0.561517	0	0	0
ENSG00000203710	0.0225381	0	0.00184654	0.00171019
ENSG00000197721	0	0	0	0
ENSG00000117335	4.86879	5.16973	6.8875	4.21283
ENSG00000174059	0.832247	0.0199388	0.0160749	0.00425368
ENSG00000076356	8.34683	71.5552	55.8108	31.7764
ENSG00000008118	0.735356	0.249783	1.24207	1.88307
ENSG00000196878	0.171605	0.0738935	0.0445791	0.0536735
ENSG00000123689	0.229525	2.85583	1.34455	2.30941
ENSG00000117594	0	0	0	0
ENSG00000009790	0.00256476	0.0172495	0	0.0101199
ENSG00000162757	1.61256	1.23438	0.343503	0.883252
ENSG00000117595	3.11398	0.0543983	0.00861469	0.0159572
ENSG00000117597	1.43866	1.18532	0.987526	1.22263
ENSG00000143469	0.476726	0.185992	1.25266	0.36748
ENSG00000283619	0	0	0	0
ENSG00000082497	0.20724	0.0855851	0.360136	0.168565
ENSG00000054392	0.535757	3.41205	0.707706	2.16121
ENSG00000143473	0.203526	0.251502	0.694718	0.0943359
ENSG00000117625	2.87703	3.08038	5.44167	3.43107
ENSG00000082512	2.58431	0.483422	0.0586638	1.37351
ENSG00000198570	0.0559125	0.0156685	0.0347385	0.0735391
ENSG00000170385	4.35011	3.91356	2.5216	2.36406
ENSG00000117650	3.5772	8.15817	2.5309	2.51506
ENSG00000123684	1.11368	1.13568	3.50558	0.492468
ENSG00000143493	3.67522	4.74161	3.99415	4.94337
ENSG00000143476	3.63493	5.09201	0.981875	5.71948
ENSG00000066027	6.34502	3.59548	1.54421	2.69633
ENSG00000065600	6.93031	10.6204	6.69119	9.49416
ENSG00000117691	14.0686	12.0851	2.56267	16.6746
ENSG00000162772	3.09962	7.17227	4.82627	4.04766
ENSG00000162771	0.00862338	0.463979	2.71865	0.187142
ENSG00000123685	0.410286	0.0307971	0.101444	0.202361
ENSG00000117697	5.68467	5.69406	6.12193	6.20668
ENSG00000203705	1.55846	1.47783	1.37486	1.12323
ENSG00000185523	0.314259	0.198148	0.0418391	0.503746
ENSG00000162769	9.81503	6.53426	8.14355	9.06102
ENSG00000143494	19.6538	3.86037	9.48553	2.35219
ENSG00000174606	3.36563	3.31178	2.99985	4.25778
ENSG00000136643	1.57667	2.0193	3.0918	2.04626
ENSG00000117707	0.387386	9.81516	15.3373	4.13318
ENSG00000143499	3.35415	10.4898	9.7041	8.88327
ENSG00000152104	10.9611	5.07747	1.01699	8.50217
ENSG00000117724	17.4029	38.6786	11.9454	23.4651
ENSG00000082482	0.0203344	0.653889	4.10417	0.391144
ENSG00000136636	3.56889	5.08536	7.117	4.6741
ENSG00000042781	0.0126012	0.0146683	0.017551	0.00860559
ENSG00000196482	0.287807	1.24502	3.63579	0.501324
ENSG00000092978	1.35243	1.91642	2.66041	2.0755
ENSG00000162814	0.00305094	0.0615582	0.0649903	0.0240766
ENSG00000067533	2.30464	2.37843	1.4368	2.35298
ENSG00000092969	0.189083	9.53124	11.3888	0.319747
ENSG00000143353	1.10576	2.41699	1.71306	1.32875
ENSG00000215817	0.193271	0.408013	0.118936	0.1271
ENSG00000196660	0.303149	0.150597	0.172447	0.163111
ENSG00000136628	10.5694	12.0959	5.92777	8.10557
ENSG00000162813	1.56436	2.27065	2.25784	1.59353
ENSG00000067704	12.747	12.9391	5.93692	9.90489
ENSG00000118873	4.01227	3.04033	3.06384	2.90774
ENSG00000116141	3.71339	3.78816	9.77045	4.28922
ENSG00000162817	6.6101	0.587535	0.223306	1.54538
ENSG00000117791	2.18133	0.302423	0.66846	0.0151
ENSG00000186205	3.01224	1.17865	1.04961	2.02893
ENSG00000136630	1.50657	0.191905	0.0486251	0.207852
ENSG00000143507	2.66708	2.9877	6.01553	2.22046
ENSG00000143512	0.114825	0.0457265	0.167357	0.137114
ENSG00000143498	0.87884	1.62776	1.30168	1.58484
ENSG00000154305	6.5214	6.81004	7.41419	7.02865
ENSG00000186063	4.96922	3.3879	2.36118	3.09029
ENSG00000162819	1.74821	1.17108	2.53792	1.48039
ENSG00000197520	0.0381807	0	0.0975979	0.0602608
ENSG00000154309	0.590915	1.67043	1.066	1.48276
ENSG00000187554	0.0215678	0.0145056	0.00459432	0.0468058
ENSG00000143502	0.168806	0.276734	3.52843	0.507876
ENSG00000178395	0.0193543	0	0	0
ENSG00000203697	0.0153135	0.00321851	0	0.0641997
ENSG00000162909	11.8466	17.7083	10.2554	18.4232
ENSG00000143514	7.01713	8.38453	5.5515	9.81513
ENSG00000143756	2.42377	2.05702	2.88276	2.27412
ENSG00000143753	8.55932	5.46828	5.72406	6.27591
ENSG00000143748	4.63368	5.39194	5.02324	5.21043
ENSG00000143771	2.76436	4.10059	2.55808	3.3884
ENSG00000162923	4.11344	4.61886	8.08163	4.5029
ENSG00000143786	1.31039	1.18277	1.34927	1.28341
ENSG00000185842	0.536968	0.648292	0.464414	1.13504
ENSG00000143815	6.48069	9.94619	10.3094	9.4997
ENSG00000154380	18.7406	16.5105	24.3862	21.3278
ENSG00000143742	57.0656	63.6024	62.3602	46.8171
ENSG00000143819	27.1524	6.0299	6.97246	5.33964
ENSG00000196187	19.923	4.93928	1.44564	7.86646
ENSG00000243709	47.795	0.98089	0.279886	1.19241
ENSG00000255835	0	0	0	0
ENSG00000143811	17.3937	10.4475	7.24691	8.69321
ENSG00000143768	109.772	6.14068	0.00885059	7.00848
ENSG00000143751	9.36589	9.40832	8.40966	8.79001
ENSG00000163041	100.648	85.4062	98.0335	75.7058
ENSG00000182827	8.14408	6.59452	8.43747	4.67442
ENSG00000185155	14.3027	0.0823582	0	0.27058
ENSG00000183814	0.532497	0.872767	0.710135	1.15649
ENSG00000143799	141.573	92.9135	53.9114	90.5483
ENSG00000203685	0.545971	0.433259	1.01628	0.387567
ENSG00000143772	10.7408	16.4184	4.35989	4.89069
ENSG00000143801	11.2682	5.78097	17.0008	10.6503
ENSG00000163050	7.60202	3.13764	5.07204	3.60109
ENSG00000143776	4.32611	5.46197	9.24548	5.25653
ENSG00000181450	1.74355	2.55671	1.66468	1.68911
ENSG00000143740	11.8083	14.3563	9.09242	9.46696
ENSG00000081692	11.6175	11.6373	11.1225	10.0331
ENSG00000185888	0	0	0	0
ENSG00000143816	1.59676	1.3466	0.741051	0.414761
ENSG00000154342	0.338965	0.0113987	0.0144411	0.274182
ENSG00000143761	153.878	129.533	120.3	102.626
ENSG00000143793	12.8406	10.2443	10.1774	9.53059
ENSG00000162910	21.9953	14.7258	12.0446	14.1181
ENSG00000143774	22.9478	19.7873	24.3787	17.74
ENSG00000198835	1.03682	0.163901	2.35963	0.708068
ENSG00000181873	5.24008	4.01941	4.87676	5.3206
ENSG00000162913	0.768479	0.421542	1.23065	0.666661
ENSG00000154358	20.4075	10.1443	8.18501	28.4419
ENSG00000154370	11.6504	10.009	11.8952	8.98295
ENSG00000162931	2.60506	0.428595	0.179007	1.08316
ENSG00000168148	0.413241	0.416894	0.176055	0.244582
ENSG00000181218	82.0616	96.8275	85.4394	57.5295
ENSG00000196890	29.8658	36.5383	33.4664	21.9131
ENSG00000168159	33.2008	31.5643	41.0458	21.5412
ENSG00000116574	5.65573	28.2267	12.5222	6.16654
ENSG00000177800	0	0	0	0
ENSG00000168118	7.79463	8.75912	7.80306	9.07507
ENSG00000213029	0	0	0	0
ENSG00000154429	1.08858	1.65958	3.27886	1.64673
ENSG00000143632	28.6653	1.03952	0.184092	1.95418
ENSG00000069248	5.49557	5.46664	3.61084	4.72769
ENSG00000135776	2.55467	3.19996	2.59658	3.13275
ENSG00000135801	4.68403	3.40881	4.45071	5.43697
ENSG00000135763	11.3081	7.26785	4.06761	9.78244
ENSG00000143641	32.6815	28.0429	23.2978	28.8172
ENSG00000177614	2.95586	3.40744	14.1624	3.12392
ENSG00000135775	1.92627	2.37259	1.98196	2.38415
ENSG00000135744	0.0520565	0.437638	0.914836	0.11126
ENSG00000135773	0.107318	0.0193334	0.2531	0.0680548
ENSG00000119280	18.3749	27.1849	21.146	26.0925
ENSG00000143643	0.660676	1.69406	2.13616	1.51757
ENSG00000173409	1.95068	2.84255	3.57993	3.32545
ENSG00000182118	2.19194	2.12895	0.999281	3.23513
ENSG00000119283	0.0149194	0.11826	15.2185	0.206039
ENSG00000143633	0.833559	1.43242	0.907367	0.999747
ENSG00000116906	3.95283	8.12615	4.47699	8.36696
ENSG00000116903	3.81169	3.7615	5.45039	3.24098
ENSG00000010072	3.06601	3.80555	3.58818	2.72896
ENSG00000135766	3.30233	5.0902	9.31915	3.23865
ENSG00000270106	0	0	0	0
ENSG00000116918	1.88545	1.51281	2.32704	1.67453
ENSG00000162946	0.260282	0.103583	0.116466	0.303849
ENSG00000116991	8.70411	13.7647	14.316	14.3366
ENSG00000212916	0.887563	0.37071	0.258912	0.027883
ENSG00000135778	4.36304	6.92283	2.5612	4.99769
ENSG00000135749	13.0815	1.6523	8.31806	5.16618
ENSG00000143674	5.4438	0.386309	0.673951	0.743078
ENSG00000135750	4.35681	0.0322507	0.175108	0.0864951
ENSG00000183780	1.90992	0.188287	0.901159	0.441856
ENSG00000168275	19.1179	11.0207	3.80633	7.3937
ENSG00000059588	3.29356	4.61626	4.49496	7.11567
ENSG00000168264	12.5472	28.7269	21.314	12.9208
ENSG00000279261	0	0	0	0
ENSG00000173726	29.3327	46.1732	30.0525	54.316
ENSG00000188739	0.638513	0.445541	0.38084	0.655048
ENSG00000054267	3.25986	5.21099	7.95547	4.42861
ENSG00000152904	5.6724	7.2826	11.4218	6.69708
ENSG00000116957	9.14895	7.09285	5.66363	7.88723
ENSG00000162885	5.086	3.83913	2.36508	5.76667
ENSG00000168243	4.27274	10.7763	28.2575	10.684
ENSG00000143669	0.0415495	0.298189	1.76152	0.296899
ENSG00000116962	20.3413	53.3544	6.1194	12.9802
ENSG00000077585	0.740326	1.4619	2.19133	1.83421
ENSG00000086619	0.307738	0.2743	0.572605	0.109722
ENSG00000186197	1.75807	1.46905	0.510682	1.25075
ENSG00000116977	0.325482	0.166933	0.198406	0.276643
ENSG00000119285	5.60349	4.23441	2.05881	4.79512
ENSG00000077522	0.815923	0.670837	0.754179	0.907682
ENSG00000116984	7.4534	9.43803	6.34709	11.3483
ENSG00000244020	0	0	0	0
ENSG00000198626	3.04018	0.0423003	0.378706	0.0474274
ENSG00000116996	0	0	0	0
ENSG00000270188	0	0	0	0
ENSG00000133019	0.824801	0.491566	6.65561	0.626726
ENSG00000155816	3.00276	6.09206	23.0799	4.05258
ENSG00000180875	1.25839	0.757382	4.02597	0.159868
ENSG00000182901	0.748761	1.42769	7.90095	0.0380725
ENSG00000091483	10.4767	16.4296	10.5853	11.076
ENSG00000117009	0	0.00281037	0	0.00659514
ENSG00000054277	0.855841	0.813939	0.507046	1.794
ENSG00000203668	1.2376	1.9653	0.975489	1.38974
ENSG00000162843	0.00804896	0	0.00857283	0.0119097
ENSG00000174371	4.82039	3.42282	1.41137	4.38087
ENSG00000196289	0.0460113	0.0902573	0.0326707	0.0605165
ENSG00000197769	1.73208	1.06031	0.0537325	0.464472
ENSG00000180287	0.293624	0.339637	0.319389	0.18077
ENSG00000143702	2.82554	5.44592	12.0262	4.34305
ENSG00000054282	1.41924	3.79613	7.20803	3.88684
ENSG00000117020	1.78105	2.7019	7.10528	1.90383
ENSG00000179456	5.65367	14.6313	15.7668	14.1809
ENSG00000173728	0	0	0.0183932	0
ENSG00000035687	10.2258	7.77179	5.7402	6.1293
ENSG00000179397	0.0183493	0.0501353	0.0146577	0.0497763
ENSG00000121644	15.1374	11.2855	5.42953	7.91363
ENSG00000203667	3.63701	3.20536	10.0151	3.16846
ENSG00000153187	72.7227	75.8883	60.4823	78.1793
ENSG00000203666	1.31635	2.17448	4.56028	2.10494
ENSG00000162849	3.27348	3.60593	25.9433	1.73707
ENSG00000185420	3.13097	3.86569	2.34948	5.09738
ENSG00000162851	5.72214	2.92072	1.69548	1.88859
ENSG00000162852	3.08793	5.32185	5.45173	2.80767
ENSG00000143653	9.00535	18.0524	13.1608	10.7555
ENSG00000153207	3.94683	4.88846	3.92832	5.3482
ENSG00000197472	1.1325	0.969884	0.70456	1.22676
ENSG00000135747	0.882865	0.789266	0.695312	1.31247
ENSG00000277462	0.66788	0.896701	0.923692	0.747321
ENSG00000188295	5.05957	6.54916	9.74062	6.70413
[truncated: 17,959 more rows]
